# Supplementary material
Source: publisher figshare collection journal article supplement (https://frontiersin.figshare.com/ndownloader/files/30422418)
Supplement: Supplementary file 1 [file 30422418]

## Sheet: Search Result Classification
Search parameters					Found item
Database	Search strategy/phrase	Date	Timeframe	Number of Results	Author(s)	Title	Year	Abbrev	Publisher	Final Pool	Reason for Final Pool Exclusion	Status by In-/Exclusion Parameters	Basis for status definition	Ex-/Inclusion criteria	Reason	Quality Indicator	Q: Is Journal / High Quality Conference?	Q: Is Journal?	Q: Venue	Q:Core Ranking	Q: Rebuttal	Q: Is HQ Conference?	Q: Practical Evaluation? Common Data?	Sequence
ACM	Advanced Search - Show Search Query: content.ftsec:(+("Application Intrusion Detection" "Intrusion Detection" "Anomaly Detection") +("Host-Based" "Application Based" "Application Specific" "Application Aware" "Application Sensitive") +("Program Behavior" "Application Behavior" "Software Behavior"))	43185		136 (140 with duplicate)	Nicholas S. Samaras, Konstantinos Kokkinos, Costas Chaikalis, Vasileios Vlachos	On Intrusion Detection in Opportunistic Networks	2013		ACM		In-/Exclusion Parameter	Excluded	Fulltext	Concern	Network	0								1
					Yingbing Yu	A Survey of Anomaly Intrusion Detection Techniques	2012		Consortium for Computing Sciences in Colleges		In-/Exclusion Parameter	Excluded	Title	Form	Survey	0								2
					M. Otey, S. Parthasarathy, A. Ghoting, G. Li, S. Narravula, D. Panda	Towards NIC-based Intrusion Detection	2003		ACM		In-/Exclusion Parameter	Excluded	Fulltext	Network		0								3
					Varun Chandola, Arindam Banerjee, Vipin Kumar	Anomaly Detection: A Survey	2009		ACM		In-/Exclusion Parameter	Excluded	Title	Form	Survey	0								4
					Gaurav Tandon, Philip Chan, Debasis Mitra	MORPHEUS: Motif Oriented Representations to Purge Hostile Events from Unlabeled Sequences	2004		ACM		Timeframe: too old	Included	Abstract	Novel	Introduces a method for cleaning datasets for anomaly detection while also providing an ADS using unsupervised learning	0								5
					Timothy Hollebeek, Rand Waltzman	The Role of Suspicion in Model-based Intrusion Detection	2004		ACM		Timeframe: too old	Included	Fulltext	Exclusive	Introduces prototypical IDS that detects malicious behavior in applications, uses system events.	0								6
					M. El-Ghali, W. Masri	Intrusion Detection Using Signatures Extracted from Execution Profiles	2009	EM9	IEEE Computer Society		Timeframe: too old	Included	Abstract	Exclusive	a system that operates on signatures extracted from execution profiles	0								7
					Christian Wressnegger, Guido Schwenk, Daniel Arp, Konrad Rieck	A Close Look on N-grams in Intrusion Detection: Anomaly Detection vs. Classification	2013		ACM		Insufficient Quality	Included	Fulltext	Novel	Presents, discusses and analyzes approaches for anomaly detection. Application level HTTP requests	0.5	No	No	ACM workshop on Artificial intelligence and security.	N/A			Partly	8
					Khaled Labib	Computer Security and Intrusion Detection	2004		ACM		Timeframe: too old					0								9
					C. C. Michael, Anup Ghosh	Simple, State-based Approaches to Program-based Anomaly Detection	2002	MG2	ACM		Timeframe: too old	Included	Abstract	Exclusive	This article describes variants of two state-based intrusion detection algorithms from Michael and Ghosh [2] and Ghosh et al. [2]; strong focus on evaluation	0								10
					Xiaokui Shu, Danfeng (Daphne) Yao, Naren Ramakrishnan, Trent Jaeger	Long-Span Program Behavior Modeling and Attack Detection	2017	SYRJ17	ACM	Yes		Included	Abstract	Exclusive	Host-based syscall analysis	1.5	Yes	Yes					Partly	11
					Darren Mutz, Fredrik Valeur, Giovanni Vigna, Christopher Kruegel	Anomalous System Call Detection	2006	MKVV6	ACM		Timeframe: too old	Included	Fulltext	exlusively host based …	2 Contributions: Multiple Models for system call arguments. Method to combine anomaly scores.	0								12
					Matthew V. Mahoney, Philip K. Chan	Learning Nonstationary Models of Normal Network Traffic for Detecting Novel Attacks	2002		ACM		In-/Exclusion Parameter	Excluded	Fulltext	Network		0								13
					David Wagner, Paolo Soto	Mimicry Attacks on Host-based Intrusion Detection Systems	2002	WS2	ACM		In-/Exclusion Parameter	Excluded	Abstract	Concern	Focusses on evaluation of IDS	0								14
					Rajeshwar Katipally, Wade Gasior, Xiaohui Cui, Li Yang	Multistage Attack Detection System for Network Administrators Using Data Mining	2010		ACM		Timeframe: too old					0								15
					Christopher Kr&#252;gel, Thomas Toth, Engin Kirda	Service Specific Anomaly Detection for Network Intrusion Detection	2002		ACM		In-/Exclusion Parameter	Excluded	Title	Network		0								16
					Fatemeh Azmandian, Micha Moffie, Malak Alshawabkeh, Jennifer Dy, Javed Aslam, David Kaeli	Virtual Machine Monitor-based Lightweight Intrusion Detection	2011	AMAJ+11	ACM		Timeframe: too old	Included	Abstract	Exclusive		0								17
					Tsung-Hsuan Ho, Daniel Dean, Xiaohui Gu, William Enck	PREC: Practical Root Exploit Containment for Android Devices	2014		ACM		Insufficient Quality	Included	Fulltext	Novel	Monitoring of classified system call to identify malware on Android devices. Executes suspicious threats in isolated environment	0.5	No	No	ACM Conference on Data and Application Security and Privacy	N/A			Partly	18
					Michael D. Bond, Varun Srivastava, Kathryn S. McKinley, Vitaly Shmatikov	Efficient, Context-sensitive Detection of Real-world Semantic Attacks	2010		ACM		Timeframe: too old	Included	Abstract	Exclusive	Adds history and context information to anomaly detection	0								19
					Marco Caselli, Emmanuele Zambon, Frank Kargl	Sequence-aware Intrusion Detection in Industrial Control Systems	2015		ACM		Insufficient Quality	Included	Abstract	Novel	Capture event sequences in SCADA event sequence aware IDS	0.5	No	No	ACM Workshop on Cyber-Physical System Security	N/A			Partly	20
					Gaurav Tandon, Philip K. Chan	Weighting Versus Pruning in Rule Validation for Detecting Network and Host Anomalies	2007		ACM		Timeframe: too old	Included	Fulltext	Novel	New algorithm for improving learning rules, network based and host based	0								21
					Maja Pusara, Carla E. Brodley	User Re-authentication via Mouse Movements	2004		ACM		In-/Exclusion Parameter	Excluded	Abstract	User		0								22
					R. Sekar, Y. Guang, S. Verma, T. Shanbhag	A High-performance Network Intrusion Detection System	1999		ACM		In-/Exclusion Parameter	Excluded	Abstract	Network	NIDS only	0								23
					Mohammad Mehdi Zeinali Zadeh, Mahmoud Salem, Neeraj Kumar, Greta Cutulenco, Sebastian Fischmeister	SiPTA: Signal Processing for Trace-based Anomaly Detection	2014		ACM		Insufficient Quality	Included	Fulltext	Exclusive	Anomaly detection using signal processing methods, based on appl specific qnx traces	0.5	No	No	International Conference on Embedded Software	N/A			Partly	24
					Jafar Haadi Jafarian, Ali Abbasi, Siavash Safaei Sheikhabadi	A Gray-box DPDA-based Intrusion Detection Technique Using System-call Monitoring	2011		ACM		Timeframe: too old					0								25
					Suresh N. Chari, Pau-Chen Cheng	BlueBoX: A Policy-driven, Host-based Intrusion Detection System	2003	CC3	ACM		Timeframe: too old	Included	Fulltext	Exclusive	we describe our experiences with building BlueBox, a host-based intrusion detection system.	0								26
					Prahlad Fogla, Wenke Lee	Evading Network Anomaly Detection Systems: Formal Reasoning and Practical Techniques	2006		ACM		Timeframe: too old					0								27
					Kun Zhang, Tao Zhang, Santosh Pande	Memory Protection Through Dynamic Access Control	2006		IEEE Computer Society		Timeframe: too old					0								28
					Sirish A. Kondi, Yoginder S. Dandass	Scanning Workstation Memory for Malicious Codes Using Dedicated Coprocessors	2006		ACM		Timeframe: too old					0								29
					Antonio Pecchia, Domenico Cotroneo, Rajeshwari Ganesan, Santonu Sarkar	Filtering Security Alerts for the Analysis of a Production SaaS Cloud	2014		IEEE Computer Society		In-/Exclusion Parameter	Excluded	Abstract	Concern	Focus is on filtering alert log information from many sources, among which could be an IDS - but no new IDS approach discussed	0								30
					Alberto Bartoli, Giorgio Davanzo, Eric Medvet	A Framework for Large-Scale Detection of Web Site Defacements	2010		ACM		Timeframe: too old					0								31
					Jeffrey Shirley, David Evans	The User is Not the Enemy: Fighting Malware by Tracking User Intentions	2008		ACM		In-/Exclusion Parameter	Excluded	Fulltext	Concern	Focuses on access policies and user behavior, not really intrusion detection.	0								32
					Chetan Parampalli, R. Sekar, Rob Johnson	A Practical Mimicry Attack Against Powerful System-call Monitors	2008		ACM		In-/Exclusion Parameter	Excluded	Abstract	Concern	Introduces an attack against specific monitors that could be used in IDS. Does not present an IDS	0								33
					Robert Erbacher, Steve Hutchinson, Joshua Edwards	Web Traffic Profiling and Characterization	2011		ACM		Timeframe: too old					0								34
					Salvatore J. Stolfo, Shlomo Hershkop, Chia-Wei Hu, Wei-Jen Li, Olivier Nimeskern, Ke Wang	Behavior-based Modeling and Its Application to Email Analysis	2006		ACM		In-/Exclusion Parameter	Excluded	Abstract	Concern	Not concerned with appl based IDS but Email Spam detection	0								35
					Stefan Marschalek, Robert Luh, Manfred Kaiser, Sebastian Schrittwieser	Classifying Malicious System Behavior Using Event Propagation Trees	2015		ACM		Insufficient Quality	Included	Abstract	Exclusive	Monitoring kernel data in real time to build event propagation trees. Then clsutering and finding anomalies in the trees.	0.5	No	No	International Conference on Information Integration and Web-based Applications & Services	N/A			Partly	36
					Cornel Barna, Mark Shtern, Michael Smit, Vassilios Tzerpos, Marin Litoiu	Mitigating DoS Attacks Using Performance Model-Driven Adaptive Algorithms	2014		ACM		In-/Exclusion Parameter	Excluded	Abstract	Concern	Network request monitoring to detect dos attacls	0								37
					Abhijit Bose, Xin Hu, Kang G. Shin, Taejoon Park	Behavioral Detection of Malware on Mobile Handsets	2008	BHSP8	ACM		Timeframe: too old	Included	Fulltext	Exclusive	Constructs signatures at runtime from observed behavior in Symbian OS	0								38
					R. K. Shyamasundar	Security and Protection of SCADA: A Bigdata Algorithmic Approach	2013		ACM		In-/Exclusion Parameter	Excluded	Fullltext	Concern	Exclude? No detail on what type of data is monitored exactly.	0								39
					Martín Abadi, Mihai Budiu, Úlfar Erlingsson, Jay Ligatti	Control-flow Integrity Principles, Implementations, and Applications	2009		ACM		Timeframe: too old					0								40
					Urko Zurutuza, Roberto Uribeetxeberria, Diego Zamboni	A Data Mining Approach for Analysis of Worm Activity Through Automatic Signature Generation	2008		ACM		Timeframe: too old					0								41
					Najwa Aaraj, Anand Raghunathan, Niraj K. Jha	A Framework for Defending Embedded Systems Against Software Attacks	2011		ACM		Timeframe: too old					0								42
					Xiaowei Li, Yuan Xue	A Survey on Server-side Approaches to Securing Web Applications	2014		ACM		In-/Exclusion Parameter	Excluded	Title	Form	Survey	0								43
					Michael E. Locasto	Self-healing: Science, Engineering, and Fiction	2008		ACM		In-/Exclusion Parameter	Excluded	Fulltext	Concern	Discussion/Position paper, does not introduce new research, survey-like	0								44
					Dimitrios Damopoulos, Georgios Kambourakis, Georgios Portokalidis	The Best of Both Worlds: A Framework for the Synergistic Operation of Host and Cloud Anomaly-based IDS for Smartphones	2014		ACM		Insufficient Quality	Included	Fulltext	Novel	Framework for local/cloud assisted AD on smartphone, with implementations of different approaches	0.5	No	No	European Workshop on System Security	N/A			Partly	45
					Shufu Mao, Tilman Wolf	Hardware Support for Secure Processing in Embedded Systems	2007		ACM		Timeframe: too old					0								46
					Jian Chang, Krishna K. Venkatasubramanian, Andrew G. West, Insup Lee	Analyzing and Defending Against Web-based Malware	2013		ACM		In-/Exclusion Parameter	Excluded	Abstract	Form	Survey	0								47
					Battista Biggio, Konrad Rieck, Davide Ariu, Christian Wressnegger, Igino Corona, Giorgio Giacinto, Fabio Roli	Poisoning Behavioral Malware Clustering	2014		ACM		In-/Exclusion Parameter	Excluded	Abstract	Concern	Focusses on poisoning of Clustering Approches employed in HIDS	0								48
					Hassen Saïdi	Logical Foundation for Static Analysis: Application to Binary Static Analysis for Security	2008		ACM		Timeframe: too old					0								49
					Meng Zhang, Anand Raghunathan, Niraj K. Jha	Towards Trustworthy Medical Devices and Body Area Networks	2013		ACM		In-/Exclusion Parameter	Excluded	Abstract	Concern	No IDS approach, discusses threats to medical implants/wearables,	0								50
					Naeem Esfahani, Eric Yuan, Kyle R. Canavera, Sam Malek	Inferring Software Component Interaction Dependencies for Adaptation Support	2016	EYCM16	ACM	Yes		Included	Fulltext	Novel	Not just IDS, but demonstrate approach to identifying abnormal behavior to possibly complement existing IDS	1.5	Yes	Yes					Partly	51
					Claudio A. Ardagna, Rasool Asal, Ernesto Damiani, Quang Hieu Vu	From Security to Assurance in the Cloud: A Survey	2015		ACM		In-/Exclusion Parameter	Excluded	Title	Form	Survey	0								52
					Xiaowei Li, Yuan Xue	BLOCK: A Black-box Approach for Detection of State Violation Attacks Towards Web Applications	2011		ACM		Timeframe: too old					0								53
					Konstantin Berlin, David Slater, Joshua Saxe	Malicious Behavior Detection Using Windows Audit Logs	2015		ACM		In-/Exclusion Parameter	Excluded	Fulltext	Concern	Malware detection using windows audit logs, not application specific!	0								54
					Charles V. Wright, Fabian Monrose, Gerald M. Masson	On Inferring Application Protocol Behaviors in Encrypted Network Traffic	2006		JMLR.org		Timeframe: too old					0								55
					Todd Warszawski, Peter Bailis	ACIDRain: Concurrency-Related Attacks on Database-Backed Web Applications	2017		ACM		In-/Exclusion Parameter	Excluded	Abstract	Concern	Monitors database accesses not application behavior	0								56
					Juan Carlos Martinez Santos, Yunsi Fei	Leveraging Speculative Architectures for Runtime Program Validation	2008		ACM		In-/Exclusion Parameter	Excluded	Abstract	Exclusive	Hardware assisted control flow validation (Excluded based on timeframe)	1.5	Yes	Yes					Partly	57
					Hassen Sa&#239;di	Guarded Models for Intrusion Detection	2007		ACM		Timeframe: too old	Included	Abstract	Exclusive	Introduces new model for appl behavior, thwarting mimicry attacks	0								58
					Lanjia Wang, Zhichun Li, Yan Chen, Zhi Fu, Xing Li	Thwarting Zero-day Polymorphic Worms with Network-level Length-based Signature Generation	2010		IEEE Press		Timeframe: too old					0								59
					Christof Fetzer, Martin Süßkraut	Switchblade: Enforcing Dynamic Personalized System Call Models	2008		ACM		Timeframe: too old					0								60
					He Yan, Lee Breslau, Zihui Ge, Dan Massey, Dan Pei, Jennifer Yates	G-RCA: A Generic Root Cause Analysis Platform for Service Quality Management in Large IP Networks	2010		ACM		Timeframe: too old					0								61
					Yi Han, Sriharsha Etigowni, Hua Liu, Saman Zonouz, Athina Petropulu	Watch Me, but Don'T Touch Me! Contactless Control Flow Monitoring via Electromagnetic Emanations	2017		ACM	Yes		Included	Fulltext	Novel	Contactless monitoring using electromagnetic sensor, build EM profiles of different applications, recognize deviation from regular execution	1.5	Yes	No	ACM SIGSAC Conference on Computer and Communications Security	A*	Yes	Yes	Partly	62
					Andrea Lanzi, Davide Balzarotti, Christopher Kruegel, Mihai Christodorescu, Engin Kirda	AccessMiner: Using System-centric Models for Malware Protection	2010		ACM		Timeframe: too old	Included	Abstract	Novel	Novel approach to characterize behavior of benign applications to recogniza malware deviating from it.	0								63
					Ludmila Cherkasova, Kivanc Ozonat, Ningfang Mi, Julie Symons, Evgenia Smirni	Automated Anomaly Detection and Performance Modeling of Enterprise Applications	2009		ACM		Timeframe: too old					0								64
					Jayanthkumar Kannan, Jaeyeon Jung, Vern Paxson, Can Emre Koksal	Semi-automated Discovery of Application Session Structure	2006	KJPK6	ACM		Timeframe: too old	Included	Abstract	0	mine a large corpus of network connection logs to extract the apparent structure of application sessions	0								65
					Michael E. Locasto, Angelos Stavrou, Angelos D. Keromytis	Dark Application Communities	2007		ACM		Timeframe: too old					0								66
					Manuel Costa, Jon Crowcroft, Miguel Castro, Antony Rowstron, Lidong Zhou, Lintao Zhang, Paul Barham	Vigilante: End-to-end Containment of Internet Worm Epidemics	2008		ACM		Timeframe: too old					0								67
					Xiwei Xu, Liming Zhu, Min Fu, Daniel Sun, An Binh Tran, Paul Rimba, Srini Dwarakanathan, Len Bass	Crying Wolf and Meaning It: Reducing False Alarms in Monitoring of Sporadic Operations Through POD-monitor	2015		IEEE Press		In-/Exclusion Parameter	Excluded	Fulltext	Concern	Not really focused on security, but cloud performance anomaly detection? Interesting way of reducing false alarms perhaps	0								68
					Liang Xie, Xinwen Zhang, Jean-Pierre Seifert, Sencun Zhu	pBMDS: A Behavior-based Malware Detection System for Cellphone Devices	2010	XSZZ1	ACM		Timeframe: too old	Included	Abstract	Exclusive	In this work we devise a novel behavior-based malware detection system named pBMDS, which adopts a probabilistic approach through correlating user inputs with system calls to detect anomalous activities in cellphones.	0								69
					Changhee Jung, Sangho Lee, Easwaran Raman, Santosh Pande	Automated Memory Leak Detection for Production Use	2014		ACM		In-/Exclusion Parameter	Excluded	Abstract	Concern	Memory leak detection	0								70
					David P. Lytle, Veronica Resendez, Robert August	Security in the Residential Network	2005		ACM		Timeframe: too old					0								71
					Alberto Avritzer, Rajanikanth Tanikella, Kiran James, Robert G. Cole, Elaine Weyuker	Monitoring for Security Intrusion Using Performance Signatures	2010		ACM		Timeframe: too old					0								72
					R. Sekar, C. R. Ramakrishnan, I. V. Ramakrishnan, S. A. Smolka	Model-Carrying Code (MCC): A New Paradigm for Mobile-code Security	2001		ACM		Timeframe: too old					0								73
					Man-Lap Li, Pradeep Ramachandran, Swarup Kumar Sahoo, Sarita V. Adve, Vikram S. Adve, Yuanyuan Zhou	Understanding the Propagation of Hard Errors to Software and Implications for Resilient System Design	2008		ACM		Timeframe: too old					0								74
					Weiming Gu, Jeffrey Vetter, Karsten Schwan	An Annotated Bibliography of Interactive Program Steering	1994		ACM		Timeframe: too old					0								75
					Kai Shen, Ming Zhong, Sandhya Dwarkadas, Chuanpeng Li, Christopher Stewart, Xiao Zhang	Hardware Counter Driven On-the-fly Request Signatures	2008		ACM		Timeframe: too old					0								76
					Marko Jahnke, Jens Toelle, Alexander Finkenbrink, Alexander Wenzel, Elmar Gerhards-Padilla, Nils Aschenbruck, Peter Martini	Methodologies and Frameworks for Testing Ids in Adhoc Networks	2007		ACM		Timeframe: too old					0								77
					Paul Dourish, David Redmiles	An Approach to Usable Security Based on Event Monitoring and Visualization	2002		ACM		Timeframe: too old					0								78
					Jeongmin Kim, Hyunwoo Choi, Hun Namkung, Woohyun Choi, Byungkwon Choi, Hyunwook Hong, Yongdae Kim, Jonghyup Lee, Dongsu Han	Enabling Automatic Protocol Behavior Analysis for Android Applications	2016		ACM		In-/Exclusion Parameter	Excluded	Abstract	Concern	Network messages monitored	0								79
					Lee W. Lerner, Mohammed M. Farag, Cameron D. Patterson	Run-time Prediction and Preemption of Configuration Attacks on Embedded Process Controllers	2012		ACM		Insufficient Quality	Included	Fulltext	Novel	Predictive control system for industrial/embedded systems, Tentative include? Although focus not only on security but fault detection	0.5	No	No	International Conference on Security of Internet of Things	N/A			Partly	80
					Mohamed Azab, Mohamed Eltoweissy	Towards a Cooperative Autonomous Resilient Defense Platform for Cyber-physical Systems	2011		ACM		Timeframe: too old					0								81
					Mark Hempstead, Gu-Yeon Wei, David Brooks	An Accelerator-based Wireless Sensor Network Processor in 130Nm CMOS	2009		ACM		Timeframe: too old					0								82
					Mihai Christodorescu, Somesh Jha, Christopher Kruegel	Mining Specifications of Malicious Behavior	2007	CHK8	ACM		Timeframe: too old	Included	Abstract	Exclusive	we mine the malicious behavior present in a known malware	0								83
					Nathan Farrington, Nikhil Handigol, Christoph Mayer, Kok-Kiong Yap, Jeffrey C. Mogul	Report on WREN 2009 -- Workshop: Research on Enterprise Networking	2010		ACM		Timeframe: too old					0								84
					Sadia Noreen, Shafaq Murtaza, M. Zubair Shafiq, Muddassar Farooq	Evolvable Malware	2009		ACM		Timeframe: too old					0								85
					Edward Amoroso, Carol Taylor, John Watson, Jonathan Weiss	A Process-oriented Methodology for Assessing and Improving Software Trustworthiness	1994		ACM		Timeframe: too old					0								86
					Divya Arora, Srivaths Ravi, Anand Raghunathan, Niraj K. Jha	Secure Embedded Processing Through Hardware-Assisted Run-Time Monitoring	2005		IEEE Computer Society		Timeframe: too old					0								87
					Kexin Pei, Zhongshu Gu, Brendan Saltaformaggio, Shiqing Ma, Fei Wang, Zhiwei Zhang, Luo Si, Xiangyu Zhang, Dongyan Xu	HERCULE: Attack Story Reconstruction via Community Discovery on Correlated Log Graph	2016		ACM		In-/Exclusion Parameter	Excluded	Fulltext	Concern	Not sure: intrusion analysis system combining different types of logs. Could beincluded, but not really application behavior?	0								88
					Partha Pal, Rick Schantz, Aaron Paulos, John Regehr, Mike Hibler	Advanced Adaptive Application (A3) Environment: Initial Experience	2011		ACM		Timeframe: too old					0								89
					Philip Tricca	A Pipeline Development Toolkit in Support of Secure Information Flow Goals	2009		ACM		Timeframe: too old					0								90
					Rui Abreu, Alberto Gonz&#225;lez, Peter Zoeteweij, Arjan J. C. van Gemund	Automatic Software Fault Localization Using Generic Program Invariants	2008		ACM		Timeframe: too old					0								91
					Ashvin Goel, Kenneth Po, Kamran Farhadi, Zheng Li, Eyal de Lara	The Taser Intrusion Recovery System	2005		ACM		Timeframe: too old					0								92
					Martina Maggio, Henry Hoffmann, Alessandro V. Papadopoulos, Jacopo Panerati, Marco D. Santambrogio, Anant Agarwal, Alberto Leva	Comparison of Decision-Making Strategies for Self-Optimization in Autonomic Computing Systems	2012		ACM		In-/Exclusion Parameter	Excluded	Abstract	Concern	Focus not on IDS	0								93
					William G. J. Halfond, Alessandro Orso	Combining Static Analysis and Runtime Monitoring to Counter SQL-injection Attacks	2005		ACM		Timeframe: too old					0								94
					Jinyong Lee, Ingoo Heo, Yongje Lee, Yunheung Paek	Efficient Security Monitoring with the Core Debug Interface in an Embedded Processor	2016	LHLP16	ACM		In-/Exclusion Parameter	Excluded	Fulltext	Concern	Hardware based approach, CDI monitoring	1.5	Yes	Yes					Partly	95
					Wai Kit Sze, Abhinav Srivastava, R. Sekar	Hardening OpenStack Cloud Platforms Against Compute Node Compromises	2016		ACM		In-/Exclusion Parameter	Excluded	Abstract	Concern	Access Control, not IDS	0								96
					Yunsi Fei, Z. Jerry Shi	Microarchitectural Support for Program Code Integrity Monitoring in Application-specific Instruction Set Processors	2007		EDA Consortium		Timeframe: too old					0								97
					Tobias Wüchner, Martín Ochoa, Alexander Pretschner	Malware Detection with Quantitative Data Flow Graphs	2014		ACM		Insufficient Quality	Included	Fulltext	Exclusive	Malware dertection using data flow graphs	0.5	No	No	Symposium on Information, Computer and Communications Security	N/A			Partly	98
					Joongi Kim, Keon Jang, Keunhong Lee, Sangwook Ma, Junhyun Shim, Sue Moon	NBA (Network Balancing Act): A High-performance Packet Processing Framework for Heterogeneous Processors	2015		ACM		In-/Exclusion Parameter	Excluded	Abstract	Concern	Network packet processing, no IDS approach	0								99
					Gianpaolo Cugola, Alessandro Margara, Mauro Pezzè, Matteo Pradella	Efficient Analysis of Event Processing Applications	2015		ACM		In-/Exclusion Parameter	Excluded	Abstract	Concern	Focus not on A/IDS	0								100
					Soudeh Ghorbani, P. Brighten Godfrey	COCONUT: Seamless Scale-out of Network Elements	2017		ACM		In-/Exclusion Parameter	Excluded	Abstract	Concern	Network scaling	0								101
					Edward G. Okie, James D. Arthur	Implicit-specification Errors and Automatic, Trace-based Debugging	1993		ACM		Timeframe: too old					0								102
					Sergey Bratus, Michael E. Locasto, Ashwin Ramaswamy, Sean W. Smith	VM-based Security Overkill: A Lament for Applied Systems Security Research	2010		ACM		Timeframe: too old					0								103
					Peter Desnoyers, Timothy Wood, Prashant Shenoy, Rahul Singh, Sangameshwar Patil, Harrick Vin	Modellus: Automated Modeling of Complex Internet Data Center Applications	2012		ACM		In-/Exclusion Parameter	Excluded	Abstract	Concern	Automated aproach for modeling, no IDS approach	0								104
					Mahendra Kutare, Greg Eisenhauer, Chengwei Wang, Karsten Schwan, Vanish Talwar, Matthew Wolf	Monalytics: Online Monitoring and Analytics for Managing Large Scale Data Centers	2010		ACM		Timeframe: too old					0								105
					Bridget Beamon, Mohan Kumar	Adaptive Context Reasoning in Pervasive Systems	2010		ACM		Timeframe: too old					0								106
					Krutartha Patel, Sridevan Parameswaran, Seng Lin Shee	Ensuring Secure Program Execution in Multiprocessor Embedded Systems: A Case Study	2007		ACM		Timeframe: too old					0								107
					Kimberly Tam, Ali Feizollah, Nor Badrul Anuar, Rosli Salleh, Lorenzo Cavallaro	The Evolution of Android Malware and Android Analysis Techniques	2017		ACM		In-/Exclusion Parameter	Excluded	Abstract	Form	Survey	0								108
					Brandon Lucia, Joseph Devietti, Karin Strauss, Luis Ceze	Atom-Aid: Detecting and Surviving Atomicity Violations	2008		ACM		Timeframe: too old					0								109
						[]	1989		ACM		Timeframe: too old					0								110
					Pradeep Ramachandran, Siva Kumar Sastry Hari, Manlap Li, Sarita V. Adve	Hardware Fault Recovery for I/O Intensive Applications	2014		ACM		In-/Exclusion Parameter	Excluded	Abstract	Concern	Reliability, Fault Recovery not seucrity	0								111
					Kashi Venkatesh Vishwanath, Amin Vahdat	Realistic and Responsive Network Traffic Generation	2006		ACM		Timeframe: too old					0								112
					Jason Flinn, Z. Morley Mao	Can Deterministic Replay Be an Enabling Tool for Mobile Computing?	2011		ACM		Timeframe: too old					0								113
					Kashi Venkatesh Vishwanath, Amin Vahdat	Swing: Realistic and Responsive Network Traffic Generation	2009		IEEE Press		Timeframe: too old					0								114
					Laurent Bernaille, Renata Teixeira, Kave Salamatian	Early Application Identification	2006		ACM		Timeframe: too old					0								115
					Marguerite Doman, Teresa Dahlberg, Jamie Payton	Simulation Environment Scenarios Using Cellular Automata for Wireless Sensor Network Analysis	2009		Society for Computer Simulation International		Timeframe: too old					0								116
					Gustavo Grieco, Guillermo Luis Grinblat, Lucas Uzal, Sanjay Rawat, Josselin Feist, Laurent Mounier	Toward Large-Scale Vulnerability Discovery Using Machine Learning	2016		ACM		In-/Exclusion Parameter	Excluded	Abstract	Concern	Program vulnerability analysis, no IDS approach	0								117
					Georgios Kornaros, Dionisios Pnevmatikatos	A Survey and Taxonomy of On-chip Monitoring of Multicore Systems-on-chip	2013		ACM		In-/Exclusion Parameter	Excluded	Title	Form	Survey	0								118
					Milena Milenković, Aleksandar Milenković, Emil Jovanov	Hardware Support for Code Integrity in Embedded Processors	2005		ACM		Timeframe: too old					0								119
					Daya Shanker Khudia, Scott Mahlke	Harnessing Soft Computations for Low-Budget Fault Tolerance	2014		IEEE Computer Society		In-/Exclusion Parameter	Excluded	Abstract	Concern	Fault detection/compiler optimization	0								120
					Kun-chan Lan, John Heidemann	A Tool for RApid Model Parameterization and Its Applications	2003		ACM		Timeframe: too old					0								121
					Yang Yu, Tzi-cker Chiueh	Display-only File Server: A Solution Against Information Theft Due to Insider Attack	2004		ACM		Timeframe: too old					0								122
					Douglas Herbert, Vinaitheerthan Sundaram, Yung-Hsiang Lu, Saurabh Bagchi, Zhiyuan Li	Adaptive Correctness Monitoring for Wireless Sensor Networks Using Hierarchical Distributed Run-time Invariant Checking	2007		ACM		Timeframe: too old					0								123
					Catello Di Martino, Saurabh Jha, William Kramer, Zbigniew Kalbarczyk, Ravishankar K. Iyer	LogDiver: A Tool for Measuring Resilience of Extreme-Scale Systems and Applications	2015		ACM		In-/Exclusion Parameter	Excluded	Abstract	Concern	Log Analysis and reliability, not security	0								124
					Brandon Lucia, Luis Ceze	Data Provenance Tracking for Concurrent Programs	2015		IEEE		In-/Exclusion Parameter	Excluded	Fulltext	Concern	Only mentions anomaly detection, no real new approach	0								125
					Thomas Pasquier, Xueyuan Han, Mark Goldstein, Thomas Moyer, David Eyers, Margo Seltzer, Jean Bacon	Practical Whole-system Provenance Capture	2017		ACM		Insufficient Quality	Included	Fulltext	Novel	Authors illustrate use of their tracing system as intrusion detection system, tentative include	0.5	No	No	Symposium on Cloud Computing	N/A			Partly	126
					Georgios Chatzopoulos, Aleksandar Dragojević, Rachid Guerraoui	ESTIMA: Extrapolating ScalabiliTy of In-Memory Applications	2017		ACM		In-/Exclusion Parameter	Excluded	Abstract	Concern	Not IDS, scalability	0								127
					Shashidhar Mysore, Banit Agrawal, Rodolfo Neuber, Timothy Sherwood, Nisheeth Shrivastava, Subhash Suri	Formulating and Implementing Profiling over Adaptive Ranges	2008		ACM		Timeframe: too old					0								128
						Summary of ACM/ONR Workshop on Parallel and Distributed Debugging	1992		ACM		Timeframe: too old					0								129
					Qi Gao, Wenbin Zhang, Zhezhe Chen, Mai Zheng, Feng Qin	2ndStrike: Toward Manifesting Hidden Concurrency Typestate Bugs	2011		ACM		Timeframe: too old					0								130
					Gregor Maier, Anja Feldmann, Vern Paxson, Mark Allman	On Dominant Characteristics of Residential Broadband Internet Traffic	2009		ACM		Timeframe: too old					0								131
					Mark Meiss, Filippo Menczer, Alessandro Vespignani	Properties and Evolution of Internet Traffic Networks from Anonymized Flow Data	2011		ACM		Timeframe: too old					0								132
					David Hovemeyer, William Pugh	Finding Bugs is Easy	2004		ACM		Timeframe: too old					0								133
					Kai Shen	Request Behavior Variations	2010		ACM		Timeframe: too old					0								134
					Yang Hu, Mingcong Song, Tao Li	Towards Full Containerization in Containerized Network Function Virtualization	2017		ACM		In-/Exclusion Parameter	Excluded	Abstract	Concern	Network management, no IDS approach	0								135
					Luca Mottola, Gian Pietro Picco	Programming Wireless Sensor Networks: Fundamental Concepts and State of the Art	2011		ACM		Timeframe: too old					0								136
IEEE	Advanced Search - Command Search - Full Text & Metadata: ("Intrusion Detection" OR "Anomaly Detection" OR "Application Intrusion Detection") AND ("Host-Based" OR "Application Based" OR "Application Specific" OR "Application Aware" OR "Application Sensitive") AND ("Program Behavior" OR "Application Behavior" OR "Software Behavior")	43185		254 (259 but duplicates removed in export)	G. Florez, Z. Liu, S. Bridges, R. Vaughn, A. Skjellum	Detecting anomalies in high-performance parallel programs	2004		IEEE		Timeframe: too old					0								137
					M. Patil, D. Pramod	Study of an effective way of detecting unexpected permission authorization to mobile apps	2017		IEEE		In-/Exclusion Parameter	Excluded	Abstract	Concern	Android permission vulnerability analysis, no Ids	0								138
					V. Snasel, J. Platos, P. Kromer, A. Abraham	Matrix Factorization Approach for Feature Deduction and Design of Intrusion Detection Systems	2008		IEEE		Timeframe: too old					0								139
					A. Aghasaryan, M. Bouzid, D. Kostadinov	Stimulus-based sandbox for learning resource dependencies in virtualized distributed applications	2017		IEEE		In-/Exclusion Parameter	Excluded	Abstract	Concern	Performance analysis	0								140
					C. C. Michael, A. Ghosh	Two state-based approaches to program-based anomaly detection	2000	MG	IEEE		Timeframe: too old	Included	Abstract	Exclusive	See MG2	0								141
					E. Pontes, A. E. Guelfi	IFS â€” Intrusion forecasting system based on collaborative architecture	2009		IEEE		Timeframe: too old					0								142
					A. Volynkin, V. A. Skormin, D. H. Summerville, J. Moronski	Evaluation of Run-Time Detection of Self-Replication in Binary Executable Malware	2006		IEEE		Timeframe: too old					0								143
					Mingjun Wei, Guangli Xu, Xuebin Chen, Chaochun Xu	Study on ontology-based intrusion detection	2010		IEEE		Timeframe: too old					0								144
					J. Lim, T. Reps, B. Liblit	Extracting Output Formats from Executables	2006		IEEE		Timeframe: too old					0								145
					C. Ko, M. Ruschitzka, K. Levitt	Execution monitoring of security-critical programs in distributed systems: a specification-based approach	1997	KRL97	IEEE		Timeframe: too old	Included	Abstract	Exclusive	The approach utilizes security specifications that describe the intended behavior of programs and scans audit trails for operations that are in violation of the specifications	0								146
					P. Jianjing, P. Xinguang	Detection of Programs Behaviors on Context Dependency	2009		IEEE		Timeframe: too old					0								147
					S. Naval, V. Laxmi, M. Rajarajan, M. S. Gaur, M. Conti	Employing Program Semantics for Malware Detection	2015	NLRG+15	IEEE		In-/Exclusion Parameter	Excluded	Fulltext	Novel	NO live monitoring, post mortem analysis, application behavior unsure?	1.5	Yes	Yes					Partly	148
					H. Qiao, J. Peng, C. Feng, J. W. Rozenblit	Behavior Analysis-Based Learning Framework for Host Level Intrusion Detection	2007		IEEE		Timeframe: too old	Included	Fulltext	Novel	Host Based intrusion detection, learning user behavior	0								149
					S. Wei, C. Ko, J. Mirkovic, A. Hussain	Tools for worm experimentation on the DETER testbed	2009		IEEE		Timeframe: too old					0								150
					K. Huang, Q. Zhang, C. Zhou, N. Xiong, Y. Qin	An Efficient Intrusion Detection Approach for Visual Sensor Networks Based on Traffic Pattern Learning	2017		IEEE		In-/Exclusion Parameter	Excluded	Abstract	Concern	Network traffic based	0								151
					F. Guo, Y. Yang, L. Duan	Anomaly Detection by Clustering in the Network	2009		IEEE		In-/Exclusion Parameter	Excluded	Abstract	Network		0								152
					Zhen Liu, S. M. Bridges	Detecting anomalies in cluster-based parallel programs using a wavelet based approach	2005		IEEE		Timeframe: too old					0								153
					Wang Chunlei, W. Yan, Dai Yiqi	A software vulnerability analysis environment based on virtualization technology	2010		IEEE		Timeframe: too old					0								154
					G. Jiang, G. Cybenko	Temporal and spatial distributed event correlation for network security	2004		IEEE		Timeframe: too old					0								155
					D. J. Wu, C. H. Mao, T. E. Wei, H. M. Lee, K. P. Wu	DroidMat: Android Malware Detection through Manifest and API Calls Tracing	2012		IEEE		In-/Exclusion Parameter	Excluded	Abstract	Concern	Focusses on static analysis for malware detection	0								156
					Z. Gu, K. Pei, Q. Wang, L. Si, X. Zhang, D. Xu	LEAPS: Detecting Camouflaged Attacks with Statistical Learning Guided by Program Analysis	2015		IEEE	Yes		Included	Abstract	Novel	Improves learning application behavior model and behavior classification, using machine learning techniques	1.5	Yes	No	International Conference on Dependable Systems and Networks	A	Yes	Yes	Partly	157
					Meng-Kai Tsai, Shun-Chieh Lin, Shian-Shyong Tseng	Protocol based foresight anomaly intrusion detection system	2003		IEEE		Timeframe: too old					0								158
					M. S. Islam, W. Khreich, A. Hamou-Lhadj	Anomaly Detection Techniques Based on Kappa-Pruned Ensembles	2018	IKHL18	IEEE	Yes		Included	Fulltext	Novel	Combining different detectors, at least one being sys call based	2	Yes	Yes					Yes	159
					M. Azab, M. Eltoweissy	Defense as a service cloud for Cyber-Physical Systems	2011		IEEE		Timeframe: too old					0								160
					H. Govada, J. B. Liu	Post intrusion assessment detection	2015	GL15	IEEE		In-/Exclusion Parameter	Excluded	Fulltext	Concern	Not application behavioral, monitors files for changes	0	No	No					No	161
					W. Haider, J. Hu, M. Xie	Towards reliable data feature retrieval and decision engine in host-based anomaly detection systems	2015	HHX15	IEEE		Insufficient Quality	Included	Abstract	Exclusive	in this paper, at DFR a character data zero watermark inspired statistical based strategy is developed for integer data to extract hidden reliable or representative features from system calls of the trace	1	No	No	Conference on Industrial Electronics and Applications	N/A			Yes	162
					D. Wagner, R. Dean	Intrusion detection via static analysis	2001		IEEE		Timeframe: too old					0								163
					Sang-Jun Han, Sung-Bae Cho	Rule-based integration of multiple measure-models for effective intrusion detection	2003		IEEE		Timeframe: too old	Included	Abstract	Novel	Multiple indicators (syslog, file access, resource usage) for anomaly detection using markov chains as models	0								164
					M. Knysz, X. Hu, K. G. Shin	Good guys vs. Bot Guise: Mimicry attacks against fast-flux detection systems	2011		IEEE		Timeframe: too old					0								165
					Y. Li, Y. Ma, M. Chen, Z. Dai	An abnormal behavior detection technology for run-time mobile application	2017		IEEE		Insufficient Quality	Included	Abstract	Exclusive	Monitor API calls on Android	0.5	No	No	International Conference on Electronics Instrumentation & Information Systems	N/A			Partly	166
					S. S. Yau, Xinyu Zhang	Computer network intrusion detection, assessment and prevention based on security dependency relation	1999		IEEE		Timeframe: too old					0								167
					S. Das, Y. Liu, W. Zhang, M. Chandramohan	Semantics-Based Online Malware Detection: Towards Efficient Real-Time Protection Against Malware	2016	DLZC16	IEEE		In-/Exclusion Parameter	Excluded	Abstract	Concern	Hardware based approach using an FPGA,	1.5	Yes	Yes					Partly	168
					S. Sparks, S. Embleton, R. Cunningham, C. Zou	Automated Vulnerability Analysis: Leveraging Control Flow for Evolutionary Input Crafting	2007		IEEE		Timeframe: too old					0								169
					M. Al-Subaie, M. Zulkernine	Efficacy of Hidden Markov Models Over Neural Networks in Anomaly Intrusion Detection	2006		IEEE		In-/Exclusion Parameter	Excluded	Abstract	Concern	Focusses on evaluation of IDS	0								170
					V. Frias-Martinez, S. J. Stolfo, A. D. Keromytis	Behavior-Profile Clustering for False Alert Reduction in Anomaly Detection Sensors	2008	FSK8	IEEE		In-/Exclusion Parameter	Excluded	Fulltext	Nework based	We present a cluster-based AD sensor that relies on clusters of behavior profiles to identify anomalous behavior	0								171
					V. Casola, A. D. Benedictis, M. Rak, U. Villano	DoS Protection in the Cloud through the SPECS Services	2015	CBRV15	IEEE		In-/Exclusion Parameter	Excluded	Fulltext	Concern	No new approach, but integrating ossec into an sla based cloud security approach	0								172
					R. Koch, M. Golling, G. Dreo	An architecture for supervising COTS products	2013		IEEE		Insufficient Quality	Included	Fulltext	Novel	Introduces approache for system call monitoring, however very lacking in detail and no evaluation details	0	No	No					No	173
					Xun Wang, Wei Yu, A. Champion, Xinwen Fu, Dong Xuan	Detecting worms via mining dynamic program execution	2007		IEEE		Timeframe: too old	Included	Abstract	Exclusive	Analysis of application behavior using system calls and classifiers	0								174
					B. Subba, S. Biswas, S. Karmakar	Host based intrusion detection system using frequency analysis of n-gram terms	2017		IEEE		In-/Exclusion Parameter	Excluded	Fulltext	Exclusive	Host based system call based Ids/AD	0								175
					M. Rahmatian, H. Kooti, I. G. Harris, E. Bozorgzadeh	Hardware-Assisted Detection of Malicious Software in Embedded Systems	2012		IEEE		In-/Exclusion Parameter	Excluded	Abstract	Concern	Hardware based approach, therefore excluded. Novel approach to do behavioral intrusion detection in real time in Hardware using an FPGA	1.5	Yes	Yes					Partly	176
					A. Sallam, E. Bertino, S. R. Hussain, D. Landers, R. M. Lefler, D. Steiner	DBSAFE An Anomaly Detection System to Protect Databases From Exfiltration Attempts	2017	SBHL+17	IEEE		In-/Exclusion Parameter	Excluded	Abstract	Novel	Introduces an ADS to protect DBMS from data exfiltration, learning application and user behavior, build user profiles not really application behavior	1.5	Yes	Yes					Partly	177
					Z. Li, L. Wang, Y. Chen, Z. Fu	Network-based and Attack-resilient Length Signature Generation for Zero-day Polymorphic Worms	2007		IEEE		Timeframe: too old					0								178
					Y. Fang, H. Li, X. Li	RSAK: Random stream attack for phase change memory in video applications	2013		IEEE		In-/Exclusion Parameter	Excluded	Abstract	Concern	Attack description, anomaly detection only mentionend	0								179
					K. Borders, Xin Zhao, A. Prakash	Siren: catching evasive malware	2006		IEEE		In-/Exclusion Parameter	Excluded	Abstract	network based		0								180
					D. Arora, S. Ravi, A. Raghunathan, N. K. Jha	Hardware-Assisted Run-Time Monitoring for Secure Program Execution on Embedded Processors	2006		IEEE		Timeframe: too old					0								181
					K. B. Hein, L. B. Hörmann, R. Weiss	Using a leaky bucket counter as an advanced threshold mechanism for event detection in wireless sensor networks	2012		IEEE		In-/Exclusion Parameter	Excluded	Abstract	Concern	Event detection in wireless sensor networks, no IDS approach	0								182
					R. Hofstede, A. Pras, A. Sperotto, G. D. Rodosek	Flow-Based Compromise Detection: Lessons Learned	2018		IEEE		In-/Exclusion Parameter	Excluded	Fulltext	Concern	Network based monitoring	0								183
					N. Wu, J. Zhang	Factor analysis based anomaly detection	2003		IEEE		In-/Exclusion Parameter	Excluded	Abstract	Network		0								184
					M. Burnside, A. D. Keromytis	Arachne: Integrated Enterprise Security Management	2007		IEEE		Timeframe: too old					0								185
					C. C. Michael	Finding the vocabulary of program behavior data for anomaly detection	2003		IEEE		Timeframe: too old	Included	Abstract	Novel	Introduces improvement to existing anomaly based IDS, focus on application behavior	0								186
					B. Cowen, K. Shafi	Fractal methods for the representation and analysis of polymorphism in malware	2013	CS13	IEEE		Insufficient Quality	Included	Fulltext	Exclusive	Malware mutates codewise to evade signature-based detection; The paper visualizes these mutations to faciliate a deeper understanding that might be useful for intrusion detection	0.5	No	No	Military Communications and Information Systems Conferenc	N/A			Partly	187
					W. Liu, P. Ren, K. Liu, H. x. Duan	Intrusion Detection Using SVM	2011		IEEE		Timeframe: too old					0								188
					A. Santos, S. Fernandes, R. Antonello, G. Szabo, P. Lopes Jr., D. Sadok	High-Performance Traffic Workload Architecture for Testing DPI Systems	2011		IEEE		Timeframe: too old					0								189
					M. T. Khan, D. Serpanos, H. Shrobe	ARMET: Behavior-Based Secure and Resilient Industrial Control Systems	2018		IEEE		In-/Exclusion Parameter	Excluded	Fulltext	Concern	Anomaly detection for Industrial Control Systems, using sensor data of control units to estimate state of system and correct/detect errors	0								190
					Y. Yao, Y. Wei, F. x. Gao, G. Yu	Anomaly Intrusion Detection Approach Using Hybrid MLP/CNN Neural Network	2006	YWFG6	IEEE		Timeframe: too old	Included	Fulltext	Exclusive	A hybrid MLP/CNN neural network is constructed in order to improve the detection rate of time-delayed attacks. While obtaining a similarly detection rate of real-time attacks as the MLP does, the proposed approach can detect time-delayed attacks efficiently with chaotic neuron.	0								191
					M. Humphrey, R. Emerson, N. Beekwilder	Unified, Multi-level Intrusion Detection in Private Cloud Infrastructures	2016		IEEE		In-/Exclusion Parameter	Excluded	Abstract	Concern	No detailed IDS approach, however requirements and threats to private cloud discussed	0								192
					X. Cui, J. Beaver, T. Potok	Swarm-Based Knowledge Discovery for Intrusion Behavior Discovering	2010		IEEE		Timeframe: too old					0								193
					R. Gopalakrishna, E. H. Spafford, J. Vitek	Efficient intrusion detection using automaton inlining	2005		IEEE		Timeframe: too old	Included	Abstract	Exclusive	We present a static analysis algorithm for constructing a flow- and context-sensitive model of a program that allows for efficient online validation.	0								194
						IEEE Standard for CASE Tool Interconnections-Reference Model for Specifying System Behavior	2009		IEEE		Timeframe: too old					0								195
					H. H. Feng, O. M. Kolesnikov, P. Fogla, W. Lee, Weibo Gong	Anomaly detection using call stack information	2003	FKF3	IEEE		Timeframe: too old	Included	Abstract	Exclusive	In this paper we propose a new method to do anomaly detection using call stack information.	0								196
					N. Antunes, M. Vieira	Penetration Testing for Web Services	2014		IEEE		In-/Exclusion Parameter	Excluded	Abstract	Concern	Penetration testing, anomaly detection mentioned, no approach	0								197
						Multi-task support for security-enabled embedded processors	2015		IEEE		Insufficient Quality	Included	Abstract	Novel	Hardware based approach to monitor concurrent tasks	0.5	No	No	International Conference on Application-specific Systems, Architectures and Processors	N/A			Partly	198
					B. Asfaw, D. Bekele, B. Eshete, A. Villafiorita, K. Weldemariam	Host-based anomaly detection for pervasive medical systems	2010	ABEV+1	IEEE		In-/Exclusion Parameter	Excluded	Fulltext	Concern	User behavior	0								199
					Dae-Ki Kang, D. Fuller, V. Honavar	Learning classifiers for misuse and anomaly detection using a bag of system calls representation	2005	KFH5	IEEE		Timeframe: too old	Included	Fulltext	Exclusive	we propose a "bag of system calls" representation for intrusion detection in system call sequences and describe misuse and anomaly detection results with standard machine learning techniques	0								200
					M. La Polla, F. Martinelli, D. Sgandurra	A Survey on Security for Mobile Devices	2013		IEEE		In-/Exclusion Parameter	Excluded	Title	Form	Survey	0								201
					A. Binun, M. Bloch, S. Dolev, M. R. Kahil, B. Menuhin, R. Yagel, T. Coupaye, M. Lacoste, A. Wailly	Self-Stabilizing Virtual Machine Hypervisor Architecture for Resilient Cloud	2014		IEEE		In-/Exclusion Parameter	Excluded	Abstract	Concern	Resilient Cloud, no IDS approach	0								202
					J. Voas, A. Ghosh, G. McGraw, F. Charron, K. Miller	Defining an adaptive software security metric from a dynamic software failure tolerance measure	1996		IEEE		Timeframe: too old					0								203
					R. Kumar	Analysis of key critical requirements for enhancing security of web applications	2015		IEEE		In-/Exclusion Parameter	Excluded	Fulltext	Concern	No novel approach	0								204
					Y. Sun, G. Petracca, T. Jaeger, H. Vijayakumar, J. Schiffman	Cloud Armor: Protecting Cloud Commands from Compromised Cloud Services	2015		IEEE		Insufficient Quality	Included	Fulltext	Novel	Build state machines from system calls to protect open stack cloud containers, prevent suspicious system calls/potentially malicious argument values	0.5	No	No	International Conference on Cloud Computing	B			Partly	205
					Shuaifu Dai, Tao Wei, Wei Zou	DroidLogger: Reveal suspicious behavior of Android applications via instrumentation	2012		IEEE		Insufficient Quality	Included	Abstract	Novel	Instrumentation of android apps to capture behavior, authors call it malware detection	0.5	No	No	international conference on computing and convergence technology	N/A			Partly	206
					U. Erlingsson	Data-Driven Software Security: Models and Methods	2016		IEEE		Insufficient Quality	Included	Fulltext	Novel	Differentiates itself from IDS,	0	No	No					No	207
					E. N. Yolacan, J. G. Dy, D. R. Kaeli	System Call Anomaly Detection Using Multi-HMMs	2014		IEEE		Insufficient Quality	Included	Abstract	Exclusive	System call traces as basis for AD using HMM, on-line detection, application specific	1	No	No	International Conference on Software Security and Reliability	N/A			Yes	208
					Jian Zhang, R. J. Figueiredo	Autonomic Feature Selection for Application Classification	2006		IEEE		Timeframe: too old					0								209
					Jinxin Zhong, Gengyu Wei, Dongmei Zhang, Yixian Yang	SAB2: A novel system of malicious webpages detection	2010		IEEE		Timeframe: too old					0								210
					G. Vigna, F. Valeur, J. Zhou, R. A. Kemmerer	Composable tools for network discovery and security analysis	2002		IEEE		Timeframe: too old					0								211
					Zhen Liu, S. M. Bridges, R. B. Vaughn	Combining static analysis and dynamic learning to build accurate intrusion detection models	2005		IEEE		Timeframe: too old	Included	Abstract	Exclusive	Combines approaches of static analysis and dynamic learning on system calls/runtime monitoring	0								212
					S. W. Kim, J. K. Lee, P. J. Dae	Method for controlling abnormal Internet traffic according to user's behaviour	2011		IEEE		Timeframe: too old					0								213
					Z. Zhengdao, P. Zhumiao, Z. Zhiping	The Study of Intrusion Prediction Based on HsMM	2008		IEEE		Timeframe: too old	Included	Abstract	Novel	Using markov models for intrusion detection on Solaris BSM data (Syscalls etc)	0								214
					D. Gamayunov	Towards Malware-Resistant Networking Environment	2011		IEEE		Timeframe: too old					0								215
					F. N. Al-Obeidat, E. S. M. El-Alfy	Network Intrusion Detection Using Multi-Criteria PROAFTN Classification	2014		IEEE		In-/Exclusion Parameter	Excluded	Abstract	Concern	Network based	0								216
					J. Rhee, H. Zhang, N. Arora, G. Jiang, K. Yoshihira	Software system performance debugging with kernel events feature guidance	2014		IEEE		In-/Exclusion Parameter	Excluded	Abstract	Concern	Performance monitoring	0								217
					R. Koch	Towards next-generation Intrusion Detection	2011		IEEE		In-/Exclusion Parameter	Excluded	Abstract	Form	Survey	0								218
					P. R. K. Varma, K. P. Raj, K. V. S. Raju	Android mobile security by detecting and classification of malware based on permissions using machine learning algorithms	2017		IEEE		In-/Exclusion Parameter	Excluded	Fulltext	Concern	Also app permission based analysis	0								219
					M. Tomášek, M. Čajkovský, I. Klimek	Cloud-centric application tracing and user monitoring intrusion prevention system	2013	TCK13	IEEE		Insufficient Quality	Included	Abstract	Exclusive	Intrusion Detection and Prevention System based on system calls, deny unknown behavior	0	No	No					No	220
					M. Chaudhry, Q. Ahmad, I. Sarwar, A. H. Akbar	Comparative study of RFID middlewares-defining the roadmap to SOA-based middlewares	2010		IEEE		Timeframe: too old					0								221
					J. B. Voron, C. Démoulins, F. Kordon	Adaptable Intrusion Detection Systems Dedicated to Concurrent Programs: A Petri Net-Based Approach	2010		IEEE		Timeframe: too old					0								222
					C. Roblee, V. Berk, G. Cybenko	Implementing Large-Scale Autonomic Server Monitoring Using Process Query Systems	2005		IEEE		In-/Exclusion Parameter	Excluded	Fulltext	Concern	Not mainly concerned with IDS, does not monitor application behavior but Process metrics and network intrusions	0								223
					G. Noseevich, A. Petukhov	Detecting Insufficient Access Control in Web Applications	2011		IEEE		Timeframe: too old					0								224
					S. K. Sahoo, M. L. Li, P. Ramachandran, S. V. Adve, V. S. Adve, Yuanyuan Zhou	Using likely program invariants to detect hardware errors	2008		IEEE		Timeframe: too old					0								225
					M. Azab, R. Hassan, M. Eltoweissy	ChameleonSoft: A moving target defense system	2011		IEEE		Timeframe: too old					0								226
					N. Harbi, E. Bahri	Real detection intrusion using supervised and unsupervised learning	2013		IEEE		In-/Exclusion Parameter	Excluded	Abstract	Concern	Network based	0								227
					Q. Wu, C. Wang, Y. Tan	System Monitoring and Controlling Mechanism Based on Hypervisor	2009		IEEE		Timeframe: too old					0								228
					D. Bruschi, L. Cavallaro, A. Lanzi	An Efficient Technique for Preventing Mimicry and Impossible Paths Execution Attacks	2007		IEEE		Timeframe: too old					0								229
					Ayumu Tanoue, Makoto Shimamura, Miyuki Hanaoka, K. Kono	FlexBox: Sandboxing internet servers based on layer-7 contexts	2008		IEEE		Timeframe: too old					0								230
					M. T. Elgraini, N. Assem, T. Rachidi	Host intrusion detection for long stealthy system call sequences	2012		IEEE		Insufficient Quality	Included	Abstract	Exclusive	IDS on system calls	1	No	No	Colloquium in Information Science and Technology	N/A			Yes	231
					A. H. Farooqi, A. Munir	Intrusion Detection System for IP Multimedia Subsystem using K-Nearest Neighbor classifier	2008		IEEE		Timeframe: too old					0								232
					R. V. Yampolskiy	Indirect Human Computer Interaction-Based Biometrics for Intrusion Detection Systems	2007		IEEE		In-/Exclusion Parameter	Excluded	Abstract	Concern	Not concerned with application behavior per se but HCI indicators gleaned from low level information. Experimental NIDS for Evaluation.	0								233
					C. Li, D. Srinivasan, T. Reindl	Hardware-assisted malware detection for embedded systems in smart grid	2015		IEEE		In-/Exclusion Parameter	Excluded	Abstract	Concern	Hardware based intrusion detection, using function calls (Is this strictly host based?)	0								234
					S. Miller, K. Curran, T. Lunney	Cloud-based machine learning for the detection of anonymous web proxies	2016		IEEE		In-/Exclusion Parameter	Excluded	Abstract	Concern	Not IDS, detecting proxies	0								235
					K. Rahimunnisa, A. S. A., K. T. S.	Hardware Assisted Address Monitoring System	2010		IEEE		Timeframe: too old					0								236
					Y. Park, D. M. Nicol, H. Zhu, C. W. Lee	Prevention of malware propagation in AMI	2013		IEEE		In-/Exclusion Parameter	Excluded	Fulltext	Concern	Network traffic based	0								237
					X. Wang, C. C. Pan, P. Liu, S. Zhu	SigFree: A Signature-Free Buffer Overflow Attack Blocker	2010		IEEE		Timeframe: too old					0								238
					F. Baiardi, D. Maggiari, D. Sgandurra, F. Tamberi	PsycoTrace: Virtual and Transparent Monitoring of a Process Self	2009		IEEE		Timeframe: too old	Included	Abstract	Exclusive	Build a context free grammar of possible system call sequences, find anomalies that way , same approach as 87	0								239
					M. Moorthy, S. Sathiyabama	A study of Intrusion Detection using data mining	2012		IEEE		In-/Exclusion Parameter	Excluded	Fulltext	Form	Survey	0								240
					J. Wang, C. Y. Sun, L. Feng, T. Zhou	Research on anomaly behavior blocking method for desktop security	2010		IEEE		Timeframe: too old					0								241
					R. P. Goldman, W. Heimerdinger, S. A. Harp, C. W. Geib, V. Thomas, R. L. Carter	Information modeling for intrusion report aggregation	2001		IEEE		Timeframe: too old					0								242
					A. Derhab, A. Bouras, F. B. Muhaya, M. K. Khan, Y. Xiang	Spam Trapping System: Novel security framework to fight against spam botnets	2014		IEEE		In-/Exclusion Parameter	Excluded	Fulltext	Concern	Spam prevention system, no appl aware IDS approach	0								243
					M. F. Raihan, M. Zulkernine	Detecting intrusions specified in a software specification language	2005		IEEE		Timeframe: too old					0								244
					M. Barrere, R. Badonnel, O. Festor	Vulnerability Assessment in Autonomic Networks and Services: A Survey	2014		IEEE		In-/Exclusion Parameter	Excluded	Title	Form	Survey	0								245
					Sang-Jun Han, Sung-Bae Cho	Evolutionary neural networks for anomaly detection based on the behavior of a program	2005	KFB5	IEEE		Timeframe: too old	Included	Abstract	Exclusive	In this paper, a novel intrusion-detection technique based on evolutionary neural networks (ENNs) is proposed	0								246
					W. Enck, P. McDaniel, T. Jaeger	PinUP: Pinning User Files to Known Applications	2008		IEEE		Timeframe: too old					0								247
					N. Jovanovic, E. Kirda, C. Kruegel	Preventing Cross Site Request Forgery Attacks	2006		IEEE		Timeframe: too old					0								248
					H. Gunes Kayacik, A. N. Zincir-Heywood, M. I. Heywood, S. Burschka	Generating mimicry attacks using genetic programming: A benchmarking study	2009		IEEE		Timeframe: too old					0								249
					C. Le Goues, T. Nguyen, S. Forrest, W. Weimer	GenProg: A Generic Method for Automatic Software Repair	2012		IEEE		In-/Exclusion Parameter	Excluded	Abstract	Concern	Software Repair via genetic programming	0								250
					D. Hollingworth, T. Redmond	Enhancing operating system resistance to information warfare	2000		IEEE		Timeframe: too old					0								251
					G. Kaiser, J. Parekh, P. Gross, G. Valetto	Kinesthetics eXtreme: an external infrastructure for monitoring distributed legacy systems	2003		IEEE		Timeframe: too old					0								252
					A. RodrÃ­guez-Mota, P. J. Escamilla-Ambrosio, S. Morales-Ortega, M. Salinas-Rosales, E. Aguirre-Anaya	Towards a 2-hybrid Android malware detection test framework	2016		IEEE		In-/Exclusion Parameter	Excluded	Fulltext	Concern	Presents a framework for malware detection, but does not mention a specific IDS/ADS approach that should be used in this framework. Only mentions what information could be used in the detection process.	0								253
					H. G. Kayacik, A. N. Zincir-Heywood, M. I. Heywood	Automatically Evading IDS Using GP Authored Attacks	2007		IEEE		In-/Exclusion Parameter	Excluded	Abstract	Concern	Is no concerned with IDS itself, but attacks that evade it.	0								254
					S. V. Uma, K. S. Gurumurthy	A novel technique for congestion avoidance/control in high speed multimedia networks using Network Intrusion Detection systems	2013		IEEE		In-/Exclusion Parameter	Excluded	Title	Concern	Network Based IDS	0								255
					J. F. Levine, J. B. Grizzard, H. L. Owen	Detecting and categorizing kernel-level rootkits to aid future detection	2006		IEEE		Timeframe: too old					0								256
					m. kashkoush, M. Azab, M. Eltoweissy, G. Attiya	Towards Online Smart Disguise: Real-Time Diversification Evading Co-Residency Based Cloud Attacks	2017		IEEE		In-/Exclusion Parameter	Excluded	Fulltext	Concern	No new IDS approach, employs IDS to detect attacks (see Smart Moving Target Defense for Linux Container Resiliency)	0								257
					R. K. Iyer, Z. Kalbarczyk, K. Pattabiraman, W. Healey, W. m. W. Hwu, P. Klemperer, R. Farivar	Toward Application-Aware Security and Reliability	2007		IEEE		Timeframe: too old					0								258
					T. Rodrigues, T. Batista, F. C. Delicato, P. F. Pires, A. Y. Zomaya	Model-driven approach for building efficient Wireless Sensor and Actuator Network applications	2013		IEEE		In-/Exclusion Parameter	Excluded	Abstract	Concern	No IDS approach, IDS used to evaluate their model driven software approach	0								259
					F. Azmandian, M. Moffie, J. G. Dy, J. A. Aslam, D. R. Kaeli	Workload Characterization at the Virtualization Layer	2011		IEEE		Timeframe: too old					0								260
					P. R. L. Eswari, N. S. C. Babu	A practical business security framework to combat malware threat	2012		IEEE		In-/Exclusion Parameter	Excluded	Fulltext	Concern	No novel Ids approach	0								261
					M. Dimitrov, H. Zhou	Unified Architectural Support for Soft-Error Protection or Software Bug Detection	2007		IEEE		Timeframe: too old					0								262
					J. E. Just, J. C. Reynolds, L. A. Clough, M. Danforth, K. N. Levitt, R. Maglich, J. Rowe	Learning unknown attacks - a start	2003		IEEE		Timeframe: too old					0								263
					J. Mao, R. Wang, Y. Chen, Y. Xiao, Y. Jia, Z. Liang	A Function-Level Behavior Model for Anomalous Behavior Detection in Hybrid Mobile Applications	2016		IEEE		Insufficient Quality	Included	Abstract	Exclusive	Proposes an approach for function level monitoring of android applications	0.5	No	No	International Conference on Identification, Information and Knowledge in the Internet of Things	N/A			Partly	264
					A. Stavrou, A. K. Ghosh	A security architecture for information assurance and availability in MANETs	2008		IEEE		In-/Exclusion Parameter	Excluded	Fulltext	Concern	Only mentions the possibility to use an IDS in the proposed architecture	0								265
					M. S. Alam, S. T. Vuong	Random Forest Classification for Detecting Android Malware	2013		IEEE		Insufficient Quality	Included	Abstract	Exclusive	Uses a certain machine learning technique to classify benign vs malicious behavior on Android devices. (Ist it actually appl behavior? Sec IIIa)	0.5	No	No	IEEE international conference on green computing and communications and IEEE Internet of Things and IEEE cyber, physical and social computing	N/A			Partly	266
					G. A. Jacoby, R. Marchany, N. J. Davis	Battery-based intrusion detection a first line of defense	2004		IEEE		Timeframe: too old	Included	Title	Exclusive		0								267
						Article Summaries	2000		IEEE		Timeframe: too old					0								268
					M. L. James, A. A. Shapiro, P. L. Springer, H. P. Zima	Introspection-Based Fault Tolerance for COTS-Based High-Capability Computation in Space	2008		IEEE		Timeframe: too old					0								269
					M. Azab, J. A. B. Fortes	Towards proactive SDN-controller attack and failure resilience	2017		IEEE		In-/Exclusion Parameter	Excluded	Fulltext	Concern	No new IDS approach, employs IDS to detect attacks (see Smart Moving Target Defense for Linux Container Resiliency)	0								270
					Jingmin Zhou, A. J. Carlson, M. Bishop	Verify results of network intrusion alerts using lightweight protocol analysis	2005		IEEE		In-/Exclusion Parameter	Excluded	Abstract	Network	NIDS only	0								271
					Zhichun Li, Manan Sanghi, Yan Chen, Ming-Yang Kao, B. Chavez	Hamsa: fast signature generation for zero-day polymorphic worms with provable attack resilience	2006		IEEE		Timeframe: too old					0								272
					O. Sukwong, H. Kim, J. Hoe	Commercial Antivirus Software Effectiveness: An Empirical Study	2011		IEEE		Timeframe: too old					0								273
					A. Schulter, J. A. Reis, F. Koch, C. B. Westphall	A Grid-based Intrusion Detection System	2006		IEEE		Timeframe: too old					0								274
					L. Sassaman, M. L. Patterson, S. Bratus, M. E. Locasto	Security Applications of Formal Language Theory	2013		IEEE		In-/Exclusion Parameter	Excluded	0	Concern	We present a formal language theory approach to improving the security aspects of protocol design and message-based interactions in complex composed systems	0								275
					M. Azab, B. M. Mokhtar, A. S. Abed, M. Eltoweissy	Smart Moving Target Defense for Linux Container Resiliency	2016		IEEE		In-/Exclusion Parameter	Excluded	Fulltext	Concern	No new IDS approach, employs IDS to detect attacks	0								276
					D. Gao, M. K. Reiter, D. Song	Beyond Output Voting: Detecting Compromised Replicas Using HMM-Based Behavioral Distance	2009		IEEE		Timeframe: too old					0								277
					F. Yu, X. Tang, Y. Yu, T. Li, T. Yang	Trusted Computing Dynamic Attestation by Using Static Analysis Based Behavior Model	2011		IEEE		Timeframe: too old					0								278
					M. Berger, F. Erlacher, C. Sommer, F. Dressler	Adaptive load allocation for combining Anomaly Detectors using controlled skips	2014		IEEE		In-/Exclusion Parameter	Excluded	Abstract	Concern	Network Based IDS	0								279
					M. Bahrololum, M. Khaleghi	Anomaly Intrusion Detection System Using Gaussian Mixture Model	2008		IEEE		Timeframe: too old					0								280
					Q. Qian, J. Li, J. Cai, R. Zhang, M. Xin	An Anomaly Intrusion Detection Method Based on PageRank Algorithm	2013		IEEE		Insufficient Quality	Included	Abstract	Exclusive	System call detection based on page rank algo	1	No	No	IEEE International Conference on Green Computing and Communications and IEEE Internet of Things and IEEE Cyber, Physical and Social Computing	N/A			Yes	281
					N. Zhang, R. Zhang, Q. Yan, W. Lou, Y. T. Hou, D. Yao	Black penguin: On the feasibility of detecting intrusion with homogeneous memory	2017		IEEE		In-/Exclusion Parameter	Excluded	Fulltext	Concern	Uses memory of process - does this map back to application behavior? - No, they do not intrepret memory dump for behavioral information, but compare memory snapshots on different machines in corporate environment to find differences	0								282
					W. Wang, J. Bickford	WhatApp: Modeling mobile applications by domain names	2016		IEEE		In-/Exclusion Parameter	Excluded	Abstract	Concern	Network security: identify applications by the domains they communicate with - not host based appl. Aware IDS	0								283
					Zhen Liu, S. M. Bridges, R. B. Vaughn	Classification of anomalous traces of privileged and parallel programs by neural networks	2003		IEEE		Timeframe: too old					0								284
					D. S. Fava, S. R. Byers, S. J. Yang	Projecting Cyberattacks Through Variable-Length Markov Models	2008		IEEE		In-/Exclusion Parameter	Excluded	Abstract	Network		0								285
					R. K. Cunningham, R. P. Lippmann, S. E. Webster	Detecting and displaying novel computer attacks with Macroscope	2001		IEEE		In-/Exclusion Parameter	Excluded	Abstract	Network	NIDS only	0								286
					A. Das, D. Nguyen, J. Zambreno, G. Memik, A. Choudhary	An FPGA-Based Network Intrusion Detection Architecture	2008		IEEE		Timeframe: too old					0								287
					T. A. Syed, S. Jan, S. Musa, J. Ali	Providing efficient, scalable and privacy preserved verification mechanism in remote attestation	2016		IEEE		In-/Exclusion Parameter	Excluded	Abstract	Concern	Np IDS approach	0								288
					M. M. Yasin, A. A. Awan	A study of host-based IDS using system calls	2004		IEEE		In-/Exclusion Parameter	Excluded	Abstract	Form	Evaluates several IDS	0								289
					M. F. Pasha, R. Budiarto, M. Syukur	Connectionist model for distributed adaptive network anomaly detection system	2005		IEEE		Timeframe: too old					0								290
					M. Pendleton, S. Xu	A dataset generator for next generation system call host intrusion detection systems	2017		IEEE		In-/Exclusion Parameter	Excluded	Fulltext	Concern	Does not introduce IDS approach but syscall dataset generator, potentially interesting for Appstacle/Thesis	0								291
					S. Sidiroglou, O. Laadan, A. D. Keromytis, J. Nieh	Using Rescue Points to Navigate Software Recovery	2007		IEEE		Timeframe: too old					0								292
					Q. Zeng, S. Wu	A Fuzzy Clustering Approach for Intrusion Detection	2009		IEEE		Timeframe: too old					0								293
					H. G. Kayacik, A. N. Zincir-Heywood	Mimicry Attacks Demystified: What Can Attackers Do to Evade Detection?	2008		IEEE		In-/Exclusion Parameter	Excluded	Abstract	Concern	Not HIDS concerned, shows techniques for avoiding detection, evaluates differend IDS approaches	0								294
					Q. Fu, J. G. Lou, Y. Wang, J. Li	Execution Anomaly Detection in Distributed Systems through Unstructured Log Analysis	2009		IEEE		Timeframe: too old					0								295
					Kewei Sun, Jie Qiu, Ying Li, Ying Chen, Weixing Ji	A state machine approach for problem detection in large-scale distributed system	2008		IEEE		Timeframe: too old					0								296
					Jidong Long, D. G. Schwartz, S. Stoecklin, M. K. Patel	Application of loop reduction to learning program behaviors for anomaly detection	2005		IEEE		Timeframe: too old					0								297
					L. Liu, O. De Vel, Q. L. Han, J. Zhang, Y. Xiang	Detecting and Preventing Cyber Insider Threats: A Survey	2018		IEEE		In-/Exclusion Parameter	Excluded	Title	Form	Survey	0								298
					P. K. Sujatha, A. Kannan, S. Ragunath, K. S. Bargavi, S. Githanjali	A Behavior Based Approach to Host-Level Intrusion Detection Using Self-Organizing Maps	2008		IEEE		In-/Exclusion Parameter	Excluded	Fulltext	Concern	Focusses on system behavior (user and host) not single user or program activity	0								299
					W. Haider, J. Hu, X. Yu, Y. Xie	Integer Data Zero-Watermark Assisted System Calls Abstraction and Normalization for Host Based Anomaly Detection Systems	2015		IEEE		Insufficient Quality	Included	Abstract	Exclusive	See HHX15	1	No	No	International Conference on Cyber Security and Cloud Computing	N/A			Yes	300
					P. D. Williams, E. H. Spafford	CuPIDS enhances StUPIDS: exploring a co-processing paradigm shift in information system security	2005	WS5	IEEE		Timeframe: too old	Included	Abstract	Exclusive	multi processor IDS	0								301
					S. H. Amer, J. A. Hamilton	Investigating intrusion detection systems that use trails of system calls	2008		IEEE		Timeframe: too old					0								302
					L. Desmet, P. Verbaeten, W. Joosen, F. Piessens	Provable Protection against Web Application Vulnerabilities Related to Session Data Dependencies	2008		IEEE		Timeframe: too old					0								303
					B. Li, J. Li, T. Wo, C. Hu, L. Zhong	A VMM-Based System Call Interposition Framework for Program Monitoring	2010		IEEE		Timeframe: too old					0								304
					Pratibha, M. Ashraf	Dominant behavior identification of load data	2015		IEEE		In-/Exclusion Parameter	Excluded	Abstract	Concern	Performance monitoring of web applications, not security	0								305
					L. Deng, D. y. Gao	Research on Immune Based Adaptive Intrusion Detection System Model	2009		IEEE		Timeframe: too old					0								306
					Y. Ikebe, T. Nakayama, M. Katagiri, S. Kawasaki, H. Abe, T. Shinagawa, K. Kato	Efficient Anomaly Detection System for Mobile Handsets	2008		IEEE		Timeframe: too old					0								307
					S. Alexander, Y. H. Cheng, B. Coan, A. Ghetie, V. Kaul, B. Siegell, S. Bellovin, N. F. Maxemchuk, H. Schulzrinne, S. Schwab, A. Stavrou, J. M. Smith	The dynamic community of interest and its realization in ZODIAC	2009		IEEE		Timeframe: too old					0								308
						2012 International Conference on Devices, Circuits and Systems (ICDCS)	2012		IEEE		In-/Exclusion Parameter	Excluded	Abstract	Concern	Conference proceedings, one paper dealing with intrusion detection, network based: "Massive Stream Data Processing to Attain Anomaly Intrusion Prevention"	0								309
					C. L. Dumitrescu	INTCTD: A Peer-to-Peer Approach for Intrusion Detection	2006		IEEE		Timeframe: too old					0								310
					T. Toth, C. Kruegel	Evaluating the impact of automated intrusion response mechanisms	2002		IEEE		In-/Exclusion Parameter	Excluded	Abstract	Network		0								311
					O. McCusker, S. Brunza, D. Dasgupta	Deriving behavior primitives from aggregate network features using support vector machines	2013		IEEE		In-/Exclusion Parameter	Excluded	Abstract	Concern	Network-Based Approach	0								312
					P. Faruki, A. Bharmal, V. Laxmi, V. Ganmoor, M. S. Gaur, M. Conti, M. Rajarajan	Android Security: A Survey of Issues, Malware Penetration, and Defenses	2015		IEEE		In-/Exclusion Parameter	Excluded	Fulltext	Form	Survey, interesting classification of malware types	0								313
						IEEE Standard for Wireless Access in Vehicular Environments--Security Services for Applications and Management Messages - Redline	2016		IEEE		In-/Exclusion Parameter	Excluded	Title	Form	Standard documentation - add exclusion criterion	0								314
					F. Zhang, Y. Ma	Using IRP with a novel artificial immune algorithm for windows malicious executables detection	2016		IEEE		In-/Exclusion Parameter	Excluded	Abstract	Concern	Malware detection based on I/O Request Package, but not application aware	0								315
					S. Mukkamala, G. Janoski, A. Sung	Intrusion detection using neural networks and support vector machines	2002		IEEE		Timeframe: too old	Included	0	0		0								316
					P. Gupta, C. Raïssi, G. Dray, P. Poncelet, J. Brissaud	SS-IDS: Statistical Signature Based IDS	2009		IEEE		Timeframe: too old	Included	Abstract	Novel	IDS approach using http requests to learn normal request behavior,	0								317
					Zhi-Song Pan, Song-Can Chen, Gen-Bao Hu, Dao-Qiang Zhang	Hybrid neural network and C4.5 for misuse detection	2003		IEEE		Timeframe: too old					0								318
					U. Ahmed, A. Masood	Host based intrusion detection using RBF neural networks	2009		IEEE		Timeframe: too old	Included	Abstract	Exclusive	A novel approach of host based intrusion detection is suggested in this paper that uses Radial basis Functions Neural Networks as profile containers	0								319
					H. Kurniawan, Y. Rosmansyah, B. Dabarsyah	Android anomaly detection system using machine learning classification	2015		IEEE		Insufficient Quality	Included	Fulltext	Novel	Monitors application behavior using metadata (network,battery consumption,temperature etc.) not really application behavior??	0.5	No	No	International Conference on Electrical Engineering and Informatics	N/A			Partly	320
					M. Tavallaee, N. Stakhanova, A. A. Ghorbani	Toward Credible Evaluation of Anomaly-Based Intrusion-Detection Methods	2010		IEEE		In-/Exclusion Parameter	Excluded	Title	Concern	Focusses on evaluation of IDS	0								321
					S. S. Clark, A. Paulos, B. Benyo, P. Pal, R. Schantz	Empirical Evaluation of the A3 Environment: Evaluating Defenses Against Zero-Day Attacks	2015		IEEE		In-/Exclusion Parameter	Excluded	Abstract	Concern	Focusses on evaluation of IDS	0								322
					T. Jia, X. Wang	Notice of Retraction<BR>The Construction and Realization of the Intelligent NIPS Based on the Cloud Security	2009		IEEE		Timeframe: too old					0								323
					X. Zhang, Y. Zhang, F. Wang	Control Strategy Based on Worms Spread in Complex Network	2009		IEEE		Timeframe: too old					0								324
					M. Gupta, J. Gao, C. C. Aggarwal, J. Han	Outlier Detection for Temporal Data: A Survey	2014		IEEE		In-/Exclusion Parameter	Excluded	Title	Form	Survey	0								325
					D. Chasaki, T. Wolf	Attacks and Defenses in the Data Plane of Networks	2012		IEEE		In-/Exclusion Parameter	Excluded	Abstract	Concern	Network based	0								326
					M. F. B. Abbas, S. P. Kadiyala, A. Prakash, T. Srikanthan, Y. L. Aung	Hardware performance counters based runtime anomaly detection using SVM	2017		IEEE		In-/Exclusion Parameter	Excluded	Abstract	Concern	Performance counter to characterize behavior, but ist it really application behavior?	0								327
					R. V. Yampolskiy	Human Computer Interaction Based Intrusion Detection	2007		IEEE		In-/Exclusion Parameter	Excluded	Abstract	Form	Survey	0								328
					S. Bhatkar, A. Chaturvedi, R. Sekar	Dataflow anomaly detection	2006	BCS6	IEEE		Timeframe: too old	Included	Abstract	Exclusive	we develop a new approach for learning dataflow behaviors of programs. The novelty in our approach, as compared to previous system-call argument learning techniques, is that it learns temporal properties involving the arguments of different system calls	0								329
					V. Jyothi, X. Wang, S. K. Addepalli, R. Karri	BRAIN: BehavioR Based Adaptive Intrusion Detection in Networks: Using Hardware Performance Counters to Detect DDoS Attacks	2016		IEEE		Insufficient Quality	Included	Fulltext	Novel	Monitors hardware behavior to classify different application behavior under DdoS attack	0.5	No	No	International Conference on VLSI Design	N/A			Partly	330
					M. Grzywa, W. Yurcik, L. Brumbaugh	Application-level survivability: resumable FTP	2001		IEEE		Timeframe: too old					0								331
					K. Wang, H. S. Kim	PCAD: Cloud Performance Anomaly Detection with Data Packet Counts	2017		IEEE		In-/Exclusion Parameter	Excluded	Abstract	Concern	Not IDS, cloud performance analysis	0								332
					N. Stakhanova, S. Basu, R. R. Lutz, J. Wong	Automated Caching of Behavioral Patterns for Efficient Run-Time Monitoring	2006		IEEE		Timeframe: too old					0								333
					ByungRae Cha, B. Vaidya, Seungjo Han	Anomaly intrusion detection for system call using the soundex algorithm and neural networks	2005		IEEE		Timeframe: too old	Included	Abstract	Exclusive	See Cha5	0								334
					J. Krimmling, S. Peter	Integration and evaluation of intrusion detection for CoAP in smart city applications	2014		IEEE		In-/Exclusion Parameter	Excluded	Fulltext	Concern	Netowrk based, Architecture with differen IDS approaches, could be interesting!	0								335
					J. Hu, X. Yu, D. Qiu, H. H. Chen	A simple and efficient hidden Markov model scheme for host-based anomaly intrusion detection	2009	HYQC9	IEEE		Timeframe: too old	Included	Abstract	Exclusive	This article proposes a simple data preprocessing approach to speed up a hidden Markov model (HMM) training for system-call-based anomaly intrusion detection	0								336
					Y. Park, Q. Zhang, D. Reeves, V. Mulukutla	AntiBot: Clustering Common Semantic Patterns for Bot Detection	2010		IEEE		Timeframe: too old					0								337
					H. H. Feng, J. T. Giffin, Yong Huang, S. Jha, Wenke Lee, B. P. Miller	Formalizing sensitivity in static analysis for intrusion detection	2004	FGHJ4	IEEE		Timeframe: too old	Included	Abstract	Exclusive	we present techniques for determinizing PDA (push down automata) models	0								338
					B. Shah, B. H. Trivedi	Improving Performance of Mobile Agent Based Intrusion Detection System	2015		IEEE		In-/Exclusion Parameter	Excluded	Abstract	Concern	Network based	0								339
					P. Rubel, M. Ihde, S. Harp, C. Payne	Generating policies for defense in depth	2005		IEEE		In-/Exclusion Parameter	Excluded	Abstract	Concern	Not concerned with intrusion detection but with security policy generation for different security mechanisms	0								340
					C. Sun, J. Ren, X. Zheng, Y. Wei, X. Zheng	JVMTI-based Model Enforcement on Java Platform for Model-Carrying Code	2009		IEEE		Timeframe: too old					0								341
					Y. Shi, G. Lee	Augmenting Branch Predictor to Secure Program Execution	2007	SL7	IEEE		Timeframe: too old	Included	Abstract	Exclusive	The proposed scheme, as a behavior-based protection, treats a triplet of the indirect branch's location, its target address, and the execution path preceding it as a behavior signature of program execution and validates it at run-time	0								342
					H. Fu, Z. Zheng, S. Bose, M. Bishop, P. Mohapatra	LeakSemantic: Identifying abnormal sensitive network transmissions in mobile applications	2017		IEEE		Insufficient Quality	Included	Fulltext	Novel	Detection of abnormal information flows/privacy leaks, network based, can also be employed by host based systems…	0.5	No	No	IEEE Conference on Computer Communications	A*	No		Partly	343
					M. Rahmatian, H. Kooti, I. G. Harris, E. Bozorgzadeh	Adaptable intrusion detection using partial runtime reconfiguration	2012		IEEE		Insufficient Quality	Included	Fulltext	Exclusive	Hardware based HIDS, analyzing syscalls	0.5	No	No	International Conference on Computer Design	N/A			Partly	344
					ByungRae Cha	Host anomaly detection performance analysis based on system call of neuro-fuzzy using Soundex algorithm and N-gram technique	2005	Cha5	IEEE		Timeframe: too old	Included	Abstract	Exclusive	this study focuses on neuro-fuzzy learning using the Soundex algorithm which is designed to change feature selection and variable length data into a fixed length learning pattern	0								345
					V. Mavroeidis, S. Bromander	Cyber Threat Intelligence Model: An Evaluation of Taxonomies, Sharing Standards, and Ontologies within Cyber Threat Intelligence	2017		IEEE		In-/Exclusion Parameter	Excluded	Fulltext	Concern	No new IDS approach, but threat intellegence modeling	0								346
					A. Sangpetch, H. S. Kim	VDEP: VM Dependency Discovery in Multi-tier Cloud Applications	2015		IEEE		In-/Exclusion Parameter	Excluded	Abstract	Concern	Automated cloud application dependency discovery system, performance modeling, no IDS approach	0								347
					A. Fedyk, M. Atighetchi, P. Pal	Leveraging ESM platforms for continuous mission-oriented assessment of information assurance	2010		IEEE		Timeframe: too old					0								348
					C. N. Lu, Y. C. Lai, C. Y. Huang, Y. D. Lin	Hardware design for statistical network traffic classifiers	2016		IEEE		In-/Exclusion Parameter	Excluded	Abstract	Concern	Network based	0								349
					H. G. Gotorlar, M. P. Aghababa, J. Bagerzadeh, M. S. Osalu	Improving intrusion detection using a novel normalization method along with the use of harmony search algorithm for feature selection	2015		IEEE		In-/Exclusion Parameter	Excluded	Abstract	Concern	Network	0								350
					F. Adelstein, C. Marceau	Snapshot Filtering Based on Resource-Usage Profiles	2009		IEEE		Timeframe: too old					0								351
					J. Farjo, R. A. Assi, W. Masri, F. Zaraket	Does Principal Component Analysis Improve Cluster-Based Analysis?	2013		IEEE		In-/Exclusion Parameter	Excluded	Fulltext	Concern	Only mentions A/IDS no new approach	0								352
					H. Noguchi, T. Mori, T. Sato	Human daily behavior accumulation in real home environment via distributed sensors in a long term	2011		IEEE		Timeframe: too old					0								353
					J. Bellizzi, M. Vella	WeXpose: Towards on-line dynamic analysis of web attack payloads using just-in-time binary modification	2015		IEEE		In-/Exclusion Parameter	Excluded	Abstract	Concern	Network level	0								354
					B. Sharma, P. Jayachandran, A. Verma, C. R. Das	CloudPD: Problem determination and diagnosis in shared dynamic clouds	2013		IEEE		In-/Exclusion Parameter	Excluded	Fulltext	Concern	Performance monitoring, not security focus	0								355
					I. A. Gul, N. Sommer, M. Rohr, A. van Hoorn, W. Hasselbring	Evaluation of control flow traces in software applications for intrusion detection	2008		IEEE		Timeframe: too old	Included	Abstract	Exclusive	Presents Application Level HIDS using control flow information to detect anomalies.	0								356
					A. Salman, I. H. Elhajj, A. Chehab, A. Kayssi	DAIDS: An Architecture for Modular Mobile IDS	2014		IEEE		Insufficient Quality	Included	Abstract	Exclusive	Introduces HIDS framework for mobile devices (Android) that is modular and uses application behavior	0.5	No	No	International Conference on Advanced Information Networking and Applications Workshops	N/A			Partly	357
					S. S. Murtaza, W. Khreich, A. Hamou-Lhadj, M. Couture	A host-based anomaly detection approach by representing system calls as states of kernel modules	2013		IEEE		Insufficient Quality	Included	Abstract	Exclusive	A novel anomaly detection technique based on semantic interactions of system calls	1	No	No	International Symposium on Software Reliability Engineering	A	No		Yes	358
					T. Ryutov, C. Neuman, K. Dongho, Z. Li	Integrated access control and intrusion detection for Web servers	2003	RNDL3	IEEE		Timeframe: too old	Included	Fulltext	exlusively host based …	Uses dynamic access control as a basis for an intrusion detection framework	0								359
					M. F. B. Abbas, A. Prakash, T. Srikanthan	Power profile based runtime anomaly detection	2017		IEEE		In-/Exclusion Parameter	Excluded	Abstract	Concern	IDS based on power profile for specific applications, is this application behavior?	0								360
					W. Mahoney, W. Sousan	IDEA: A New Intrusion Detection Data Source	2008		IEEE		Timeframe: too old					0								361
					M. Azab, B. Mokhtar, A. S. Abed, M. Eltoweissy	Toward Smart Moving Target Defense for Linux Container Resiliency	2016		IEEE		In-/Exclusion Parameter	Excluded	Fulltext	Concern	No new IDS approach, employs IDS to detect attacks (see Smart Moving Target Defense for Linux Container Resiliency)	0								362
					C. Dartigue, H. I. Jang, W. Zeng	A New Data-Mining Based Approach for Network Intrusion Detection	2009		IEEE		In-/Exclusion Parameter	Excluded	Fulltext	Concern	Only Network IDS	0								363
					A. Pouraghily, T. Wolf, R. Tessier	Hardware support for embedded operating system security	2017		IEEE		In-/Exclusion Parameter	Excluded	Abstract	Concern	Monitors instructions in hardware, not technically host-based	0								364
					K. A. Garcia, R. Monroy, L. A. Trejo, C. Mex-Perera, E. Aguirre	Analyzing Log Files for Postmortem Intrusion Detection	2012	GMTM+12	IEEE		In-/Exclusion Parameter	Excluded	Fulltext	Novel	Log analysis to find cause for intrusion/exploit after it happened. Learning normal behavior from clean logs. No monitoring approach, does not detail application awareness (System call monitoring should allow for identifying malicious process but not detailed here, explicitly not examining individual applications)	1.5	Yes	Yes					Partly	365
					R. Sangeetha	Detection of malicious code in user mode	2013		IEEE		In-/Exclusion Parameter	Excluded	Fulltext	Concern	Malware monitoring using system calls, but no specific approach to identify malicious behavior given	0								366
					L. Zhou, Y. Makris	Hardware-based workload forensics: Process reconstruction via TLB monitoring	2016		IEEE		In-/Exclusion Parameter	Excluded	Fulltext	Concern	Not strictly IDS, workload forensics based on hardware to reconstruct workloads/executions	0								367
					G. A. Jacoby, N. J. Davis	Battery-based intrusion detection	2004		IEEE		Timeframe: too old	Included	Abstract	0	Monitors the power consumption of mobile devices	0								368
					S. Arshad, M. A. Shah, A. Wahid, A. Mehmood, H. Song, H. Yu	SAMADroid: A Novel 3-Level Hybrid Malware Detection Model for Android Operating System	2018	ASW+18	IEEE	Yes		Included	Fulltext	Novel	Describes multiple approaches, malware detection, detection is done on server and communicated to client, monitoring in background	2	Yes	Yes					Yes	369
					D. Hongle, T. Shaohua, Z. Qingfang	Intrusion Detection Based on Fuzzy Support Vector Machines	2009		IEEE		Timeframe: too old					0								370
					J. C. Munson, S. Wimer	Watcher: the missing piece of the security puzzle	2001		IEEE		Timeframe: too old	Included	Fulltext	Novel	Proposes approach called procedural based IDS, using software behavior	0								371
					D. Novikov, R. V. Yampolskiy, L. Reznik	ARTIFICIAL INTELLIGENCE APPROACHES FOR INTRUSION DETECTION	2006		IEEE		Timeframe: too old					0								372
					Lap-chung Lam, Tzi-cker Chiueh	Automatic extraction of accurate application-specific sandboxing policy	2005	LC4	IEEE		Timeframe: too old	Included	Abstract	exlusively host based …	derives an application-specific system call behavior model from the application’s source code	0								373
					R. Kaur, M. Singh	A Survey on Zero-Day Polymorphic Worm Detection Techniques	2014		IEEE		In-/Exclusion Parameter	Excluded	Title	Form	Survey	0								374
					P. Rubel, M. Atighetchi, P. Pal, M. Fong, R. O'Brien	Effective Monitoring of a Survivable Distributed Networked Information System	2008		IEEE		In-/Exclusion Parameter	Excluded	Title	Network		0								375
					A. Mandal, P. Ruth, I. Baldin, D. Król, G. Juve, R. Mayani, R. F. D. Silva, E. Deelman, J. Meredith, J. Vetter, V. Lynch, B. Mayer, J. Wynne, M. Blanco, C. Carothers, J. Lapre, B. Tierney	Toward an End-to-End Framework for Modeling, Monitoring and Anomaly Detection for Scientific Workflows	2016		IEEE		In-/Exclusion Parameter	Excluded	Abstract	Concern	Performance monitoring	0								376
					R. P. Lippmann, D. J. Fried, I. Graf, J. W. Haines, K. R. Kendall, D. McClung, D. Weber, S. E. Webster, D. Wyschogrod, R. K. Cunningham, M. A. Zissman	Evaluating intrusion detection systems: the 1998 DARPA off-line intrusion detection evaluation	2000	LFGW+98	IEEE		In-/Exclusion Parameter	Excluded	Abstract	Concern	Focusses on evaluation of IDS	0								377
					A. Salman, I. H. Elhajj, A. Chehab, A. Kayssi	Mobile malware exposed	2014		IEEE		Insufficient Quality	Included	Abstract	Exclusive	Using Xposed framework to detect malware, integrates with IDS	0.5	No	No	International Conference on Computer Systems and Applications	C			Partly	378
					A. Callado, C. Kamienski, G. Szabo, B. P. Gero, J. Kelner, S. Fernandes, D. Sadok	A Survey on Internet Traffic Identification	2009		IEEE		In-/Exclusion Parameter	Excluded	Title	Form	Survey	0								379
					W. Chen, X. Luo, A. N. Zincir-Heywood	Exploring a service-based normal behaviour profiling system for botnet detection	2017		IEEE		In-/Exclusion Parameter	Excluded	Fulltext	Concern	Network based	0								380
Sciencedirect	Advanced Search - Expert Search: ("Intrusion Detection" OR "Anomaly Detection" OR "Application Intrusion Detection") AND ("Host-Based" OR "Application Based" OR "Application Specific" OR "Application Aware" OR "Application Sensitive") AND ("Program Behavior" OR "Application Behavior" OR "Software Behavior")	43185		108	Wael Khreich, Syed Shariyar Murtaza, Abdelwahab Hamou-Lhadj, Chamseddine Talhi	Combining heterogeneous anomaly detectors for improved software security	2018	KMHLT18	Elsevier	Yes		Included	Abstract	Exclusive	Introduces HIDS approach combining different detectors on system calls	2	Yes	Yes					Yes	381
					Mohamed Elsabagh, Daniel Barbará, Dan Fleck, Angelos Stavrou	On early detection of application-level resource exhaustion and starvation	2018	EBFS18	Elsevier	Yes		Included	Fulltext	Exclusive	Early detection of resource over consumption, builds application profiles using system calls	1.5	Yes	Yes					Partly	382
					Sen Chen, Minhui Xue, Lingling Fan, Shuang Hao, Lihua Xu, Haojin Zhu, Bo Li	Automated poisoning attacks and defenses in malware detection systems: An adversarial machine learning approach	2018	CXFH+18	Elsevier		In-/Exclusion Parameter	Excluded	Fulltext	Concern	No live monitoring but disassebling and static analysis of applications to find malware, However, interesting API call approach	1.5	Yes	Yes					Partly	383
					Nanda Kumar Thanigaivelan, Ethiopia Nigussie, Antti Hakkala, Seppo Virtanen, Jouni Isoaho	CoDRA: Context-based dynamically reconfigurable access control system for android	2018		Elsevier		In-/Exclusion Parameter	Excluded	Abstract	Concern	No IDS but adaptive access control	0								384
					Roberto Di Pietro, Flavio Lombardi, Matteo Signorini	CloRExPa: Cloud resilience via execution path analysis	2014		Elsevier		In-/Exclusion Parameter	Excluded	Fulltext	Concern	Distances itself from IDS, maybe interesting anyway?	0								385
						Index	2005		Elsevier		Timeframe: too old					0								386
						Appendix C - Architectural Risk Analysis Reference Tables	2011		Elsevier		Timeframe: too old					0								387
					Indraneel Sreeram, Venkata Praveen Kumar Vuppala	HTTP flood attack detection in application layer using machine learning metrics and bio inspired bat algorithm	2017		Elsevier		In-/Exclusion Parameter	Excluded	Abstract	Concern	Network level monitoring	0								388
					Krzysztof Cabaj, Marcin Gregorczyk, Wojciech Mazurczyk	Software-defined networking-based crypto ransomware detection using {HTTP} traffic characteristics	2018		Elsevier		In-/Exclusion Parameter	Excluded	Abstract	Concern	Countermeasures against ransomware, network based, no IDS	0								389
					Maria Chaudhry, Ali Hammad Akbar, Qanita Ahmad, Imran Sarwar	SOARware1: Treading through the crossroads of {RFID} middleware and {SOA} paradigm	2011		Elsevier		Timeframe: too old					0								390
					Michael A Gallo, William M Hancock	Chapter 16 - Network Security Issues	2002		Elsevier		Timeframe: too old					0								391
					Subharthi Paul, Jianli Pan, Raj Jain	Architectures for the future networks and the next generation Internet: A survey	2011		Elsevier		Timeframe: too old					0								392
					Michele Sama, David S. Rosenblum, Zhimin Wang, Sebastian Elbaum	Multi-layer faults in the architectures of mobile, context-aware adaptive applications	2010		Elsevier		Timeframe: too old					0								393
					Michal Szymaniak, David Presotto, Guillaume Pierre, Maarten van Steen	Practical large-scale latency estimation	2008		Elsevier		Timeframe: too old					0								394
					Anton A. Chuvakin, Branden R. Williams, Anton A. Chuvakin, Branden R. Williams	Chapter 8 â€“ Vulnerability Management	2010		Elsevier		Timeframe: too old					0								395
					Daniel Minoli, Daniel Minoli	Chapter 5 â€“ Issues with Current VoIP Technologies	2006		Elsevier		Timeframe: too old					0								396
					Riyad Alshammari, A. Nur Zincir-Heywood	Can encrypted traffic be identified without port numbers, IP addresses and payload inspection?	2011		Elsevier		Timeframe: too old					0								397
					Augusto Vega, Pradip Bose, Alper Buyuktosunoglu, A. Vega, P. Bose, A. Buyuktosunoglu, R.F. DeMara	Chapter 2 â€“ Reliable and power-aware architectures: Fundamentals and modeling	2017		Elsevier		In-/Exclusion Parameter	Excluded	Meta	Availability	Not currently available at UNiversity Library, book chapter	0								398
					Z. Cliffe Schreuders, Tanya McGill, Christian Payne	The state of the art of application restrictions and sandboxes: A survey of application-oriented access controls and their shortfalls	2013		Elsevier		In-/Exclusion Parameter	Excluded	Title	Form	Survey	0								399
					Ramaswamy Ramaswamy, Ning Weng, Tilman Wolf	Analysis of network processing workloads	2009		Elsevier		Timeframe: too old					0								400
					Guido Salvaneschi, Carlo Ghezzi, Matteo Pradella	Context-oriented programming: A software engineering perspective	2012		Elsevier		In-/Exclusion Parameter	Excluded	Fulltext	Concern	Only mentions IDS	0								401
					Ron Ben Natan, Ron Ben Natan	5 â€“ Application Security	2005		Elsevier		Timeframe: too old					0								402
					Jose-Miguel Horcas, Mónica Pinto, Lidia Fuentes, Wissam Mallouli, Edgardo Montes de Oca	An approach for deploying and monitoring dynamic security policies	2016		Elsevier		In-/Exclusion Parameter	Excluded	Fulltext	Concern	Security Policy monitoring	0								403
					Wei Li, Marco Canini, Andrew W. Moore, Raffaele Bolla	Efficient application identification and the temporal and spatial stability of classification schema	2009		Elsevier		Timeframe: too old					0								404
					Seongjin Lee, Jongwoo Song, Soohan Ahn, Youjip Won	Session-based classification of internet applications in 3G wireless networks	2011		Elsevier		Timeframe: too old					0								405
					Myungjin Lee, Mohammad Hajjat, Ramana Rao Kompella, Sanjay G. Rao	A flow measurement architecture to preserve application structure	2015		Elsevier		In-/Exclusion Parameter	Excluded	Abstract	Concern	NIDS only	0								406
					Eric Knapp, Eric Knapp	Chapter 6 â€“ Vulnerability and Risk Assessment	2011		Elsevier		Timeframe: too old					0								407
					Giuseppe Aceto, Antonio Pescapè	Internet Censorship detection: A survey	2015		Elsevier		In-/Exclusion Parameter	Excluded	Title	Form	Survey	0								408
					Heidar Pirzadeh, Sara Shanian, Abdelwahab Hamou-Lhadj, Luay Alawneh, Arya Shafiee	Stratified sampling of execution traces: Execution phases serving as strata	2013		Elsevier		In-/Exclusion Parameter	Excluded	Abstract	Concern	Focus on trace condensation, no IDS approach	0								409
					Rajjeet Phull, Ramiro Liscano, Alex Mihailidis	Comparative Analysis of Prominent Middleware Platforms in the Domain of Ambient Assisted Living (AAL) for an Older Adults with Dementia (OAwD) Scenario	2016		Elsevier		In-/Exclusion Parameter	Excluded	Abstract	Concern	Anomaly detection only mentioned in context of sensor monitoring	0								410
					Mamoona Rafique, Muhammad Naeem Ahmed Khan	Profiling software applications for forensic analysis	2015		Elsevier		In-/Exclusion Parameter	Excluded	Fulltext	Concern	Behavior profiling for applications, no focus on security or IDS approach	0								411
					Tilman Wolf, Russell Tessier, Gayatri Prabhu	Securing the data path of next-generation router systems	2011		Elsevier		Timeframe: too old					0								412
					Tony Kenyon, Tony Kenyon	5 â€“ Designing Secure Networks	2002		Elsevier		Timeframe: too old					0								413
					Bassem Mokhtar, Mohamed Eltoweissy	Big data and semantics management system for computer networks	2017		Elsevier		In-/Exclusion Parameter	Excluded	Fulltext	Concern	Focus not on IDS	0								414
					M. Avvenuti, P. Corsini, P. Masci, A. Vecchio	An application adaptation layer for wireless sensor networks	2007		Elsevier		Timeframe: too old					0								415
					Erez Metula, Erez Metula	Chapter 9 â€“ Defending against MCRs	2011		Elsevier		Timeframe: too old					0								416
					Moussa Ouedraogo, Djamel Khadraoui, Haralambos Mouratidis, Eric Dubois	Appraisal and reporting of security assurance at operational systems level	2012		Elsevier		In-/Exclusion Parameter	Excluded	Abstract	Concern	Not concerned with IDS but metrics for evaluating security of a system	0								417
					John W. Rittinghouse, William M. Hancock, John W. Rittinghouse, William M. Hancock	18 â€“ Future Trends in Security	2004		Elsevier		Timeframe: too old					0								418
					Guanling Chen, Ming Li, David Kotz	Data-centric middleware for context-aware pervasive computing	2008		Elsevier		Timeframe: too old					0								419
					Qi Liao, Andrew Blaich, Dirk VanBruggen, Aaron Striegel	Managing networks through context: Graph visualization and exploration	2010		Elsevier		Timeframe: too old					0								420
					Debanjan Ghosh, Raj Sharman, H. Raghav Rao, Shambhu Upadhyaya	Self-healing systems â€” survey and synthesis	2007		Elsevier		Timeframe: too old					0								421
					Yan Hu, Dah-Ming Chiu, John C.S. Lui	Profiling and identification of P2P traffic	2009		Elsevier		Timeframe: too old					0								422
					Paul Lothian, Peter Wenham	Database Security in a Web Environment	2001		Elsevier		Timeframe: too old					0								423
					Anton Chuvakin, Kevin Schmidt, Chris Phillips, Anton Chuvakin, Kevin Schmidt, Chris Phillips	Chapter 19 â€“ Logs and Compliance	2013		Elsevier		In-/Exclusion Parameter	Excluded	Meta	Availability	Not currently available at UNiversity Library, book chapter	0								424
					Izzat Alsmadi, Dianxiang Xu	Security of Software Defined Networks: AÂ survey	2015		Elsevier		In-/Exclusion Parameter	Excluded	Title	Form	Survey	0								425
					Victor Prokhorenko, Kim-Kwang Raymond Choo, Helen Ashman	Web application protection techniques: A taxonomy	2016		Elsevier		In-/Exclusion Parameter	Excluded	Title	Form	Survey character	0								426
					John R. Vacca, Scott R. Ellis, John R. Vacca, Scott R. Ellis	4 â€“ Choosing the Right Firewall	2005		Elsevier		Timeframe: too old					0								427
					Yi-Min Wang, Chad Verbowski, John Dunagan, Yu Chen, Helen J. Wang, Chun Yuan, Zheng Zhang	Strider: a black-box, state-based approach to change and configuration management and support	2004		Elsevier		In-/Exclusion Parameter	Excluded	Abstract	Concern	Does not focus on IDS	0								428
					Cobus Strauss	Appendix A â€“ The internet	2003		Elsevier		Timeframe: too old					0								429
					Ashvin Goel, Wu-chang Feng, Wu-chi Feng, David Maier	Automatic high-performance reconstruction and recovery	2007		Elsevier		Timeframe: too old					0								430
					Deon Reynders, Edwin Wright, Deon Reynders, Edwin Wright	14 â€“ Security considerations	2003		Elsevier		Timeframe: too old					0								431
					Malik Shahzad Kaleem Awan, Pete Burnap, Omer Rana	Identifying cyber risk hotspots: A framework for measuring temporal variance in computer network risk	2016		Elsevier		In-/Exclusion Parameter	Excluded	Fulltext	Concern	No IDS approach, uses IDS logs, network analysis	0								432
					Valentina Casola, Alessandra De Benedictis, Massimiliano Rak, Umberto Villano	Chapter 11 â€“ Monitoring Data Security in the Cloud: A Security SLA-Based Approach	2018		Elsevier		In-/Exclusion Parameter	Excluded	Meta	Availability	Not currently available at UNiversity Library, book chapter	0								433
					Seungwon Shin, Zhaoyan Xu, Guofei Gu	EFFORT: A new hostâ€“network cooperated framework for efficient and effective bot malware detection	2013		Elsevier		In-/Exclusion Parameter	Excluded	Fulltest	Concern	Bot detection using network and input events, but not really application behavior	0								434
					Xiaojun Zhai, Kofi Appiah, Shoaib Ehsan, Gareth Howells, Huosheng Hu, Dongbing Gu, Klaus McDonald-Maier	Exploring ICMetrics to detect abnormal program behaviour on embedded devices	2015	ZAEH+15	Elsevier		In-/Exclusion Parameter	Excluded	Fulltext	Concern	Uses PC and CPI to detect anomalous behavior, really application behavior? Also, requires connecting to debug port, geared towards external hardware	1.5	Yes	Yes					Partly	435
					James M. Aquilina, James M. Aquilina	Chapter 10 â€“ Analysis of a Suspect Program: Linux	2008		Elsevier		Timeframe: too old					0								436
					Hilmi Güneş Kayacık, A. Nur Zincir-Heywood, Malcolm I. Heywood	Can a good offense be a good defense? Vulnerability testing of anomaly detectors through an artificial arms race	2011		Elsevier		In-/Exclusion Parameter	Excluded	Abstract	Concern	Not concerned with a certain IDS technique, but testing an ADS using an automated vulnerability tester-	0								437
					Yuehui Chen, Ajith Abraham, Bo Yang	Feature selection and classification using flexible neural tree	2006		Elsevier		Timeframe: too old					0								438
					Mohammad Nauman, Nouman Azam, JingTao Yao	A three-way decision making approach to malware analysis using probabilistic rough sets	2016		Elsevier		In-/Exclusion Parameter	Excluded	Fulltext	Concern	Malware detection not intrusion detection, however quite similar - include??	0								439
					Fabrizio Baiardi, Dario Maggiari, Daniele Sgandurra, Francesco Tamberi	Transparent Process Monitoring in a Virtual Environment	2009		Elsevier		Timeframe: too old	Included	Abstract	Exclusive	Build a context free grammar of possible system call sequences, find anomalies that way	0								440
					Karina Sokolova, Charles Perez, Marc Lemercier	Android application classification and anomaly detection with graph-based permission patterns	2017		Elsevier		In-/Exclusion Parameter	Excluded	Fulltext	Concern	Not application behavior but app permissions analysis	0								441
					Walter Cerroni, Gianluca Moro, Roberto Pasolini, Marco Ramilli	Decentralized detection of network attacks through P2P data clustering of SNMP data	2015		Elsevier		In-/Exclusion Parameter	Excluded	Abstract	Concern	Network Based	0								442
					Paul D. Williams, Eugene H. Spafford	CuPIDS: An exploration of highly focused, co-processor-based information system protection	2007		Elsevier		Timeframe: too old	Included	Fulltext	Novel	Presents an architecture for a HIDS monitoring application behavior, evaluates multiproc performance.	0								443
					A. Shabtai, L. Tenenboim-Chekina, D. Mimran, L. Rokach, B. Shapira, Y. Elovici	Mobile malware detection through analysis of deviations in application network behavior	2014		Elsevier		In-/Exclusion Parameter	Excluded	Abstract	Network	Learns network traffic of specific applications	0								444
					Augusto Vega, Pradip Bose, Alper Buyuktosunoglu, J. Rosenberg	Chapter e6 â€“ Embedded security	2017		Elsevier		In-/Exclusion Parameter	Excluded	Meta	Availability	Not currently available at UNiversity Library, book chapter	0								445
					Tania Lorido-Botran, Sergio Huerta, Luis Tomás, Johan Tordsson, Borja Sanz	An unsupervised approach to online noisy-neighbor detection in cloud data centers	2017		Elsevier		In-/Exclusion Parameter	Excluded	Abstract	Concern	Resource monitoring, not security	0								446
					Wes Masri, Andy Podgurski	Application-based anomaly intrusion detection with dynamic information flow analysis	2008	MP8	Elsevier		Timeframe: too old	Included	Fulltext	Exclusive	Program executions are captured in the field and are replayed, profiled, and analyzed offline.	0								447
					Justin Clarke, Justin Clarke	Chapter 9 â€“ Platform-Level Defenses	2009		Elsevier		Timeframe: too old					0								448
					Zubair A. Baig	Multi-agent systems for protecting critical infrastructures: A survey	2012		Elsevier		In-/Exclusion Parameter	Excluded	Title	Form	Survey	0								449
					Tarik Guelzim	Chapter 29 â€“ Formal methods of attack modeling and detection	2015		Elsevier		In-/Exclusion Parameter	Excluded	Meta	Availability	Not currently available at uniiversity library, book chapter	0								450
					Kenneth L. Ingham, Anil Somayaji, John Burge, Stephanie Forrest	Learning DFA representations of HTTP for protecting web applications	2007		Elsevier		Timeframe: too old	Included	Abstract	Novel	Protecting Web Apps, HTTP requests application level	0								451
					Wes Masri, Rawad Abou Assi, Marwa El-Ghali	Generating profile-based signatures for online intrusion and failure detection	2014	MAEG14	Elsevier	Yes		Included	Abstract	Exclusive	This paper presents a pattern-matching approach implemented as an application-basedintrusion (and failure) detection system that operates on signatures generated from execution profiles.	1.5	Yes	Yes					Partly	452
					A.A. Abimbola, J.M. Munoz, W.J. Buchanan	NetHost-sensor: Monitoring a target host's application via system calls	2006		Elsevier		Timeframe: too old	Included	Abstract	Exclusive	Anomaly based IDS, monitors app behavior using system calls etc	0								453
					Shelly Xiaonan Wu, Wolfgang Banzhaf	The use of computational intelligence in intrusion detection systems: A review	2010		Elsevier		Timeframe: too old					0								454
					Hung-Jen Liao, Chun-Hung Richard Lin, Ying-Chih Lin, Kuang-Yuan Tung	Intrusion detection system: A comprehensive review	2013		Elsevier		In-/Exclusion Parameter	Excluded	Title	Form	Survey	0								455
					Chia-Mei Chen, Ya-Lin Chen, Hsiao-Chung Lin	An efficient network intrusion detection	2010		Elsevier		In-/Exclusion Parameter	Excluded	Abstract	Network		0								456
					Huwaida Tagelsir Elshoush, Izzeldin Mohamed Osman	Alert correlation in collaborative intelligent intrusion detection systemsâ€”A survey	2011		Elsevier		Timeframe: too old					0								457
					Natalia Stakhanova, Samik Basu, Johnny Wong	On the symbiosis of specification-based and anomaly-based detection	2010		Elsevier		Timeframe: too old	Included	Abstract	Exclusive	"The proposed technique allows automatic development of the normal and abnormal behavioral specifications in a form of variable-length patterns classified via anomaly-based approach."	0								458
					Wun-Hwa Chen, Sheng-Hsun Hsu, Hwang-Pin Shen	Application of SVM and ANN for intrusion detection	2005	CHS5	Elsevier		Timeframe: too old	Included	Fulltext	Exclusive	"Two data mining methodologies—Artificial Neural Networks (ANNs) and Support Vector Machine (SVM) and two encoding methods—simple frequency-based scheme and tf×idf scheme are used to detect potential system intrusions in this study"	0								459
					Sang-Jun Han, Sung-Bae Cho	Detecting intrusion with rule-based integration of multiple models	2003	HC3	Elsevier		Timeframe: too old	Included	Abstract	Exclusive	"We measure normal behavior by systems calls, resource usage and file access events and build up profiles for normal behavior with hidden Markov model, statistical method and rule-base method, which are integrated with a rule-based approach"	0								460
					Animesh Patcha, Jung-Min Park	An overview of anomaly detection techniques: Existing solutions and latest technological trends	2007		Elsevier		In-/Exclusion Parameter	Excluded	Title	Form	Survey	0								461
					Xin Xu	Sequential anomaly detection based on temporal-difference learning: Principles, models and case studies	2010		Elsevier		Timeframe: too old					0								462
					Srilatha Chebrolu, Ajith Abraham, Johnson P. Thomas	Feature deduction and ensemble design of intrusion detection systems	2005	CAT5	Elsevier		Timeframe: too old	Included	Fulltext	0	claims to be generic but only evaluated on network data	0								463
					Reza Azmi, Boshra Pishgoo	SHADuDT: Secure hypervisor-based anomaly detection using danger theory	2013	AP13	Elsevier	Yes		Included	Abstract	Exclusive	Architecture and approach for anomaly detection based on system calls, using hypervisor	1.5	Yes	Yes					Partly	464
					Tian Xinguang, Duan Miyi, Sun Chunlai, Li Wenfa	Intrusion detection based on system calls and homogeneous Markov chains	2008		Elsevier		Timeframe: too old					0								465
					Xin-guang TIAN, Li-zhi GAO, Chun-lai SUN, Mi-yi DUAN, Er-yang ZHANG	A Method for Anomaly Detection of User Behaviors Based on Machine Learning	2006		Elsevier		Timeframe: too old					0								466
					Suleyman Kondakci	Analysis of information security reliability: A tutorial	2015		Elsevier		In-/Exclusion Parameter	Excluded	Abstract	Concern	Network based, survey, tutorial	0								467
					Tomislav Janjusic, Krishna Kavi	Chapter Three â€“ Hardware and Application Profiling Tools	2014		Elsevier		In-/Exclusion Parameter	Excluded	Meta	Availability	Not currently available at uniiversity library, book chapter	0								468
					A. Tedeschi, F. Benedetto	A real-time automatic pavement crack and pothole recognition system for mobile Android-based devices	2017		Elsevier		In-/Exclusion Parameter	Excluded	Abstract	Domain	Road condition monitoring	0								469
					Paul Goransson, Chuck Black, Paul Goransson, Chuck Black	Chapter 4 â€“ How SDN Works	2014		Elsevier		In-/Exclusion Parameter	Excluded	Meta	Availability	Not currently available at uniiversity library, book chapter	0								470
					Anton Chuvakin, Anton Chuvakin	Chapter 9 â€“ Vulnerability Management	2012		Elsevier		In-/Exclusion Parameter	Excluded	Meta	Availability	Not currently available at uniiversity library, book chapter	0								471
					Ali Feizollah, Nor Badrul Anuar, Rosli Salleh, Ainuddin Wahid Abdul Wahab	A review on feature selection in mobile malware detection	2015		Elsevier		In-/Exclusion Parameter	Excluded	Abstracht	Form	Survey character	0								472
					Maryam Amiri, Leyli Mohammad-Khanli	Survey on prediction models of applications for resources provisioning in cloud	2017		Elsevier		In-/Exclusion Parameter	Excluded	Title	Form	Survey	0								473
						Innovative methods and algorithms for advanced data-intensive computing	2014		Elsevier		In-/Exclusion Parameter	Excluded	Fulltext	Form	Editorial	0								474
					K. Munivara Prasad, A. Rama Mohan Reddy, K. Venugopal Rao	BARTD: Bio-inspired anomaly based real time detection of under rated App-DDoS attack on web	2017		Elsevier		In-/Exclusion Parameter	Excluded	Fulltext	Concern	Monitors network metrics to defend against ddos	0								475
					Seyyed Mojtaba Bidoki, Saeed Jalili, Asghar Tajoddin	PbMMD: A novel policy based multi-process malware detection	2017	BJT17	Elsevier	Yes		Included	Abstract	Exclusive	Malware monitoring using system call sequences to form application behavior	1.5	Yes	Yes					Partly	476
					Tomasz Bujlow, Valentín Carela-Español, Pere Barlet-Ros	Independent comparison of popular DPI tools for traffic classification	2015		Elsevier		In-/Exclusion Parameter	Excluded	Abstract	Concern	Network based	0								477
					N. Clarke, F. Li, S. Furnell	A novel privacy preserving user identification approach for network traffic	2017		Elsevier		In-/Exclusion Parameter	Excluded	Abstract	Concern	Not concerned with intrusion detection but user identification, similar problems as with anomaly detection (profiling etc)	0								478
					B. Shravan Kumar, Vadlamani Ravi	A survey of the applications of text mining in financial domain	2016		Elsevier		In-/Exclusion Parameter	Excluded	Title	Form	Survey	0								479
					Saman Zonouz, Amir Houmansadr, Robin Berthier, Nikita Borisov, William Sanders	Secloud: A cloud-based comprehensive and lightweight security solution for smartphones	2013	ZHB+13	Elsevier	Yes		Included	Fulltext	Novel	Mirroring smartphone in cloud, detection in cloud, notify smartphone when compromised, system call monitoring	1.5	Yes	Yes					Partly	480
					Hossein Hadian Jazi, Hugo Gonzalez, Natalia Stakhanova, Ali A. Ghorbani	Detecting HTTP-based application layer DoS attacks on web servers in the presence of sampling	2017		Elsevier		In-/Exclusion Parameter	Excluded	Fulltext	Concern	Network Based	0								481
					Justin Clarke, Justin Clarke	Chapter 9 â€“ Platform level defenses	2012		Elsevier		In-/Exclusion Parameter	Excluded	Meta	Availability	Not currently available at uniiversity library, book chapter	0								482
					Preeti Mishra, Emmanuel S. Pilli, Vijay Varadharajan, Udaya Tupakula	Intrusion detection techniques in cloud environment: A survey	2017		Elsevier		In-/Exclusion Parameter	Excluded	Title	Form	Survey	0								483
					Shahaboddin Shamshirband, Nor Badrul Anuar, Miss Laiha Mat Kiah, Ahmed Patel	An appraisal and design of a multi-agent system based cooperative wireless intrusion detection computational intelligence technique	2013		Elsevier		In-/Exclusion Parameter	Excluded	Abstract	Form	Survey, interesting for our own survey?	0								484
					Jason Reeves, Ashwin Ramaswamy, Michael Locasto, Sergey Bratus, Sean Smith	Intrusion detection for resource-constrained embedded control systems in the power grid	2012	RRL+12	Elsevier	Yes		Included	Abstract	Exclusive	Host based IDS, syscall monitoring, constrained resources embedded devices	1.5	Yes	Yes					Partly	485
					Yulai Xie, Dan Feng, Zhipeng Tan, Junzhe Zhou	Unifying intrusion detection and forensic analysis via provenance awareness	2016	XFTZ16	Elsevier	Yes		Included	Abstract	Exclusive	Use object provenance (data and control flow) information to better pinpoint cause for intrusion alarm and reduce false positives	1.5	Yes	Yes					Partly	486
					Wael Khreich, Babak Khosravifar, Abdelwahab Hamou-Lhadj, Chamseddine Talhi	An anomaly detection system based on variable N-gram features and one-class SVM	2017	KKHLT17	Elsevier	Yes		Included	Abstract	Exclusive	Host Based system call monitoring, SVM and n grams	2	Yes	Yes					Yes	487
Springer Link	Advanced Search - Exclude Preview Content - ("Intrusion Detection" OR "Anomaly Detection" OR "Application Intrusion Detection") AND ("Host-Based" OR "Application Based" OR "Application Specific" OR "Application Aware" OR "Application Sensitive") AND ("Program Behavior" OR "Application Behavior" OR "Software Behavior")	43185		238	Aleksandar Lazarevic, Vipin Kumar, Jaideep Srivastava	Intrusion Detection: A Survey	2005		Springer		In-/Exclusion Parameter	Excluded	Title	Form	Survey	0								488
					Monirul Sharif, Kapil Singh, Jonathon Giffin, Wenke Lee	Understanding Precision in Host Based Intrusion Detection	2007		Springer		In-/Exclusion Parameter	Excluded	Abstract	Concern	We prove that for any system-call sequence model, under the same (static or dynamic) program analysis technique, there always exists a more precise control-flow sequence based mode	0								489
					Gaurav Tandon, Debasis Mitra, Philip K. Chan	Motif-Oriented Representation of Sequences for a Host-Based Intrusion Detection System	2004		Springer		Timeframe: too old					0								490
					Vit Bukac, Pavel Tucek, Martin Deutsch	Advances and Challenges in Standalone Host-Based Intrusion Detection Systems	2012		Springer		In-/Exclusion Parameter	Excluded	Abstract	Form	Survey	0								491
					Sanjay Rawat, V. P. Gulati, Arun K. Pujari	A Fast Host-Based Intrusion Detection System Using Rough Set Theory	2005	RGP5	Springer		Timeframe: too old	Included	Abstract	Exclusive	"It is established that very small subsequence of system call is sufficient to identify intrusive behavior with high accuracy"	0								492
					Anup K. Ghosh, Christoph Michael, Michael Schatz	A Real-Time Intrusion Detection System Based on Learning Program Behavior	2000	GMS	Springer		Timeframe: too old	Included	Abstract	Exclusive	"we describe three machine learning algorithms that learn the normal behavior of programs running on the Solaris platform in order to detect unusual uses or misuses"	0								493
					Gaurav Tandon, Philip Chan, Debasis Mitra	Data Cleaning and Enriched Representations for Anomaly Detection in System Calls	2006		Springer		In-/Exclusion Parameter	Excluded	Title/Meta	Form	Book Chapter	0								494
					Ali A. Ghorbani, Wei Lu, Mahbod Tavallaee	Data Collection	2010		Springer		Timeframe: too old					0								495
					Xinguang Tian, Xueqi Cheng, Miyi Duan, Rui Liao, Hong Chen, Xiaojuan Chen	Network intrusion detection based on system calls and data mining	2010		Springer		Timeframe: too old					0								496
					Robert Luh, Stefan Marschalek, Manfred Kaiser, Helge Janicke, Sebastian Schrittwieser	Semantics-aware detection of targeted attacks: a survey	2017		Springer		In-/Exclusion Parameter	Excluded	Title	Form	Survey	0								497
					Salvatore J. Stolfo, Shlomo Hershkop, Linh H. Bui, Ryan Ferster, Ke Wang	Anomaly Detection in Computer Security and an Application to File System Accesses	2005	SHBF+5	Springer		Timeframe: too old	Included	Abstract	Exclusive	"File Wrapper Anomaly Detector (FWRAP) has two parts, a sensor that audits file systems, and an unsupervised machine learning system that computes normal models of those accesses"	0								498
					Grandhi Jyostna, Pareek Himanshu, P. R. L. Eswari	Detecting Anomalous Application Behaviors Using a System Call Clustering Method over Critical Resources	2011		Springer		Timeframe: too old	Included	Abstract	Exclusive	Host based ADS using registry callback techniques to learn behavior and find deviations (Windows focused)	0								499
					Sufatrio, Roland H. C. Yap	Improving Host-Based IDS with Argument Abstraction to Prevent Mimicry Attacks	2006		Springer		Timeframe: too old					0								500
					Zhen Li, Junfeng Tian	A New Approach of Capturing System Call Context for Software Behavior Automaton Model	2011		Springer		Timeframe: too old					0								501
						Intrusion Detection and Reaction: an Integrated Ap	2008		Springer		Timeframe: too old					0								502
					Michael E. Locasto, Angelos Stavrou, Gabriela F. Cretu, Angelos D. Keromytis, Salvatore J. Stolfo	Return Value Predictability Profiles for Selfâ€“healing	2008		Springer		Timeframe: too old					0								503
					Byung, Rae Cha, Kyung, Woo Park, Jae, Hyun Seo	Neural Network Techniques for Host Anomaly Intrusion Detection Using Fixed Pattern Transformation	2005		Springer		Timeframe: too old	Included	Abstract	Exclusive	See Cha5	0								504
					Sung-Bae Cho, Sang-Jun Han	Two Sophisticated Techniques to Improve HMM-Based Intrusion Detection Systems	2003	CH3	Springer		Timeframe: too old	Included	Fulltext	Exclusive	Two improvements to HMM based anomaly detection	0								505
					Feng Qian, Zhiyun Qian, Z. Morley Mao, Atul Prakash	Ensemble: Community-Based Anomaly Detection for Popular Applications	2009		Springer		Timeframe: too old					0								506
					Philip K. Chan, Matthew V. Mahoney, Muhammad H. Arshad	Learning Rules and Clusters for Anomaly Detection in Network Traffic	2005		Springer		In-/Exclusion Parameter	Excluded	Abstract	Network		0								507
					Latifur Khan, Mamoun Awad, Bhavani Thuraisingham	A new intrusion detection system using support vector machines and hierarchical clustering	2007		Springer		In-/Exclusion Parameter	Excluded	Abstract	Network		0								508
					Kohei Tatara, Toshihiro Tabata, Kouichi Sakurai	A Probabilistic Method for Detecting Anomalous Program Behavior	2005		Springer		Timeframe: too old					0								509
					Carla Marceau, Matt Stillerman	Modular Behavior Profiles in Systems with Shared Libraries (Short Paper)	2006	MS6	Springer		Timeframe: too old	Included	Abstract	Exclusive	propose monitoring the calls between those libraries as a new source of data for host-based anomaly detection	0								510
					Ja-Min Koo, Sung-Bae Cho	Viterbi Algorithm for Intrusion Type Identification in Anomaly Detection System	2004		Springer		Timeframe: too old					0								511
						Formal Specification for Fast Automatic Profiling	2008		Springer		Timeframe: too old					0								512
					Sang-Jun Han, Kyung-Joong Kim, Sung-Bae Cho	Evolutionary Learning Programâ€™s Behavior in Neural Networks for Anomaly Detection	2004		Springer		Timeframe: too old					0								513
					Jonathon T. Giffin, David Dagon, Somesh Jha, Wenke Lee, Barton P. Miller	Environment-Sensitive Intrusion Detection	2006	GDJL+5	Springer		Timeframe: too old	Included	Abstract	Exclusive	"We improve the effectiveness of such model-based intrusion detection systems by incorporating into the model knowledge of the environment in which the program runs"	0								514
					Olivier Sarrouy, Eric Totel, Bernard Jouga	Application Data Consistency Checking for Anomaly Based Intrusion Detection	2009		Springer		Timeframe: too old	Included	Fulltext	Novel	Enhances behavior based intrusion detection by analyzing porcess state and ist data	0								515
					Ali A. Ghorbani, Wei Lu, Mahbod Tavallaee	Detection Approaches	2010		Springer		Timeframe: too old					0								516
					Samik Basu, Prem Uppuluri	Proxi-Annotated Control Flow Graphs: Deterministic Context-Sensitive Monitoring for Intrusion Detection	2005		Springer		Timeframe: too old					0								517
					Muhammad Fermi Pasha, Rahmat Budiarto, Mohammad Syukur, Masashi Yamada	EFIS: Evolvable-Neural-Based Fuzzy Inference System and Its Application for Adaptive Network Anomaly Detection	2006		Springer		In-/Exclusion Parameter	Excluded	Abstract	Network		0								518
					Manuel Egele, Martin Szydlowski, Engin Kirda, Christopher Kruegel	Using Static Program Analysis to Aid Intrusion Detection	2006		Springer		In-/Exclusion Parameter	Excluded	Fulltext	Concern	The static analysis offers information about parameters the application expects, but no real new intrusion detection approach is presented, just the static analysis.	0								519
					Debin Gao, Michael K. Reiter, Dawn Song	Behavioral Distance for Intrusion Detection	2006	GRS5	Springer		Timeframe: too old	Included	Abstract	Exclusive	"We explore behavioral distance as a means to detect an attack on one process that causes its behavior to deviate from that of another"	0								520
					Hongying Zheng, Lin Ni, Di Xiao	Intrusion Detection Based on MLP Neural Networks and K-Means Algorithm	2005		Springer		Timeframe: too old					0								521
					Alessandro Frossi, Federico Maggi, Gian Luigi Rizzo, Stefano Zanero	Selecting and Improving System Call Models for Anomaly Detection	2009		Springer		Timeframe: too old					0								522
					Thomas Barabosch, Sebastian Eschweiler, Elmar Gerhards-Padilla	Bee Master: Detecting Host-Based Code Injection Attacks	2014		Springer		Insufficient Quality	Included	Fulltext	Novel	Not clear what is monitored, also is a honeypot still just an IDS? Could monitor memory pages or threads, maybe also sys calls?	0.5	No	No	International Conference on Detection of Intrusions and Malware, and Vulnerability Assessment	C			Partly	523
					Gaurav Tandon, Philip K. Chan	Increasing coverage to improve detection of network and host anomalies	2010		Springer		Timeframe: too old					0								524
					Simon P. Chung, Aloysius K. Mok	On Random-Inspection-Based Intrusion Detection	2006		Springer		Timeframe: too old					0								525
					Xiaokui Shu, Danfeng (Daphne) Yao, Barbara G. Ryder	A Formal Framework for Program Anomaly Detection	2015		Springer		In-/Exclusion Parameter	Excluded	Fulltext	Concern	Does not introduce new approach but formal framework for evaluating anomaly detection - could be interesting!	0								526
					Aubrey-Derrick Schmidt, Frank Peters, Florian Lamour, Christian Scheel, Seyit Ahmet Çamtepe, Şahin Albayrak	Monitoring Smartphones for Anomaly Detection	2009		Springer		Timeframe: too old					0								527
					Daxin Tian, Yanheng Liu, Bin Li	A Distributed Hebb Neural Network for Network Anomaly Detection	2007		Springer		Timeframe: too old					0								528
					Lorenzo Cavallaro, R. Sekar	Taint-Enhanced Anomaly Detection	2011		Springer		Timeframe: too old					0								529
					Shambhu Upadhyaya, Ramkumar Chinchani, Kiran Mantha, Kevin Kwiat	Encapsulation of Userâ€™s Intent: A New Proactive Intrusion Assessment Paradigm	2005		Springer		Timeframe: too old					0								530
					Salvatore D’Antonio, Marcello Esposito, Francesco Oliviero, Simon Pietro Romano, Dario Salvi	Behavioral network engineering: making intrusion detection become autonomic	2006		Springer		Timeframe: too old					0								531
					Narcisa Andreea Milea, Siau Cheng Khoo, David Lo, Cristian Pop	NORT: Runtime Anomaly-Based Monitoring of Malicious Behavior for Windows	2012		Springer		Insufficient Quality	Included	Abstract	Exclusive	Host based ADS based on application behavior	0.5	No	No	International Conference on Runtime Verification	N/A			Partly	532
					Prem Uppuluri, R. Sekar	Experiences with Specification-Based Intrusion Detection	2001		Springer		Timeframe: too old					0								533
					Konrad Rieck, Pavel Laskov	Detecting Unknown Network Attacks Using Language Models	2006		Springer		In-/Exclusion Parameter	Excluded	Title/Meta	Network	Network IDS	0								534
					James P. Early, Carla E. Brodley	Behavioral Features for Network Anomaly Detection	2006		Springer		Timeframe: too old					0								535
					Federico Maggi, William Robertson, Christopher Kruegel, Giovanni Vigna	Protecting a Moving Target: Addressing Web Application Concept Drift	2009		Springer		Timeframe: too old					0								536
					Qingbo Yin, Liran Shen, Rubo Zhang, Xueyao Li	A Novel Anomaly Detection Using Small Training Sets	2005		Springer		Timeframe: too old					0								537
					Mahdi Mohammadi, Ahmad Akbari, Bijan Raahemi, Babak Nassersharif	A Real Time Anomaly Detection System Based on Probabilistic Artificial Immune Based Algorithm	2012		Springer		In-/Exclusion Parameter	Excluded	Fulltext	Concern	Network data only	0								538
					Marcello Esposito, Claudio Mazzariello, Francesco Oliviero, Simon Pietro Romano, Carlo Sansone	REAL TIME DETECTION OF NOVEL ATTACKS BY MEANS OF DATA MINING TECHNIQUES	2006		Springer		In-/Exclusion Parameter	Excluded	Fulltext	Network		0								539
					Jason Reeves, Ashwin Ramaswamy, Michael Locasto, Sergey Bratus, Sean Smith	Lightweight Intrusion Detection for Resource-Constrained Embedded Control Systems	2011		Springer		Timeframe: too old					0								540
					Olivier Sarrouy, Eric Totel, Bernard Jouga	Building an Application Data Behavior Model for Intrusion Detection	2009		Springer		Timeframe: too old					0								541
					Yi Hu, Brajendra Panda	Design and Analysis of Techniques for Detection of Malicious Activities in Database Systems	2005		Springer		Timeframe: too old					0								542
					Salvatore D’Antonio, Francesco Oliviero, Roberto Setola	High-Speed Intrusion Detection in Support of Critical Infrastructure Protection	2006		Springer		Timeframe: too old					0								543
					Sami Alsouri, Jan Sinschek, Andreas Sewe, Eric Bodden, Mira Mezini, Stefan Katzenbeisser	Dynamic Anomaly Detection for More Trustworthy Outsourced Computation	2012		Springer		Insufficient Quality	Included	Fulltext	Novel	Trust in public clouds by comparing application behavior in private and public cloud -	0.5	No	No	International Conference on Information Security	N/A			Partly	544
					Nong Ye, Toni Farley, Deepak Lakshminarasimhan	An attack-norm separation approach for detecting cyber attacks	2006		Springer		Timeframe: too old					0								545
					Shengfeng Tian, Chuanhuan Yin, Shaomin Mu	High-Order Markov Kernels for Network Intrusion Detection	2006		Springer		Timeframe: too old					0								546
					Mohamed Azab, Mohamed Eltoweissy	ChameleonSoft: Software Behavior Encryption for Moving Target Defense	2013		Springer		In-/Exclusion Parameter	Excluded	Fulltext	Concern	Not mainly concerned with IDS but encryption adaptation	0								547
					Malek Ben Salem, Shlomo Hershkop, Salvatore J. Stolfo	A Survey of Insider Attack Detection Research	2008		Springer		In-/Exclusion Parameter	Excluded	Title	Form	Survey	0								548
					Min Zhao, Fangbin Ge, Tao Zhang, Zhijian Yuan	AntiMalDroid: An Efficient SVM-Based Malware Detection Framework for Android	2011	ZGZY11	Springer		Timeframe: too old	Included	Abstract	Exclusive	AntiMalDroid, a software behavior signature based malware detection framework using SVM algorithm is proposed	0								549
					Antonio Durante, Roberto Di Pietro, Luigi V. Mancini	Formal Specification for Fast Automatic IDS Training	2003		Springer		Timeframe: too old					0								550
					Adam J. Oliner, Ashutosh V. Kulkarni, Alex Aiken	Community Epidemic Detection Using Time-Correlated Anomalies	2010		Springer		Timeframe: too old					0								551
					Patrick Duessel, Christian Gehl, Ulrich Flegel, Sven Dietrich, Michael Meier	Detecting zero-day attacks using context-aware anomaly detection at the application-layer	2017		Springer		In-/Exclusion Parameter	Excluded	Abstract	Concern	Network based	0								552
					Martin Rehák, Michal Pěchouček, David Medvigy, Magda Prokopová, Jan Tožička, Lukáš Foltýn	Agent Methods for Network Intrusion Detection and Response	2007		Springer		Timeframe: too old					0								553
					Koohong Kang	Anomaly Detection of Hostile Traffic Based on Network Traffic Distributions	2008		Springer		Timeframe: too old					0								554
					Marco Cova, Viktoria Felmetsger, Giovanni Vigna	Vulnerability Analysis of Web-based Applications	2007		Springer		Timeframe: too old					0								555
					Bob Gilbert, Richard Kemmerer, Christopher Kruegel, Giovanni Vigna	Dymo: Tracking Dynamic Code Identity	2011		Springer		Timeframe: too old	Included	Abstract	Novel	Coupes network packet information with process information that originated the packet therefore making it a host-based approache	0								556
					John S. Baras, Maben Rabi	Intrusion Detection with Support Vector Machines and Generative Models	2002		Springer		Timeframe: too old					0								557
					Patrick Düssel, Christian Gehl, Pavel Laskov, Konrad Rieck	Incorporation of Application Layer Protocol Syntax into Anomaly Detection	2008		Springer		Timeframe: too old					0								558
					Wei Xiong, Naixue Xiong, Laurence T. Yang, Jong Hyuk Park, Hanping Hu, Qian Wang	An anomaly-based detection in ubiquitous network using the equilibrium state of the catastrophe theory	2013		Springer		In-/Exclusion Parameter	Excluded	Abstract	Concern	Network Based IDS	0								559
					Suresh Reddy, Sukumar Nandi	Enhanced Network Traffic Anomaly Detector	2005		Springer		Timeframe: too old					0								560
					Khaled Labib, V. Rao Vemuri	An application of principal component analysis to the detection and visualization of computer network attacks	2006		Springer		In-/Exclusion Parameter	Excluded	Title/Meta	Network	Only NIDS	0								561
					Francesco Camastra, Angelo Ciaramella, Antonino Staiano	Machine learning and soft computing for ICT security: an overview of current trends	2013		Springer		In-/Exclusion Parameter	Excluded	Title	Form	Survey	0								562
					Saurabh Singh, Pradip Kumar Sharma, Seo Yeon Moon, Daesung Moon, Jong Hyuk Park	A comprehensive study on APT attacks and countermeasures for future networks and communications: challenges and solutions	2016		Springer		In-/Exclusion Parameter	Excluded	Fulltext	Form	Survey/Study on defense mechanisms against Advanced Persistent Threats	0								563
					Jingyu Hua, Mingchu Li, Kouichi Sakurai, Yizhi Ren	Efficient Intrusion Detection Based on Static Analysis and Stack Walks	2009		Springer		Timeframe: too old					0								564
					Denis Shaykhislamov, Vadim Voevodin	An Approach for Detecting Abnormal Parallel Applications Based on Time Series Analysis Methods	2018		Springer		In-/Exclusion Parameter	Excluded	Abstract	Concern	Monitoring for performance not for security	0								565
					Sheneela Naz, Sohail Asghar, Simon Fong, Amir Qayyum	Multi-way Association Clustering Analysis on Adaptive Real-Time Multicast Data	2011		Springer		Timeframe: too old					0								566
					Matthias Gander, Michael Felderer, Basel Katt, Ruth Breu	Monitoring Anomalies in IT-Landscapes Using Clustering Techniques and Complex Event Processing	2012	GFKB12	Springer		Insufficient Quality	Included	Fulltext	Exclusive	IT landscape model with workflows, which are tracked on running system, possible to identify anomalies	0	No	No					No	567
					Thomas Toth, Christopher Kruegel	Accurate Buffer Overflow Detection via Abstract Pay load Execution	2002		Springer		Timeframe: too old					0								568
					Olgierd Pieczul, Simon N. Foley	Runtime Detection of Zero-Day Vulnerability Exploits in Contemporary Software Systems	2016		Springer		Insufficient Quality	Included	Fulltext	Exclusive	Describes and evaluates approach for detecting application level anomalies in Java	0.5	No	No	Annual Conference on Data and Applications Security and Privacy	N/A			Partly	569
					Min Luo, Lina Wang, Huanguo Zhang, Jin Chen	A Research on Intrusion Detection Based on Unsupervised Clustering and Support Vector Machine	2003		Springer		In-/Exclusion Parameter	Excluded	Abstract	Network		0								570
					Marco Cova, Davide Balzarotti, Viktoria Felmetsger, Giovanni Vigna	Swaddler: An Approach for the Anomaly-Based Detection of State Violations in Web Applications	2007		Springer		Timeframe: too old					0								571
					Calvin Ko, Paul Brutch, Jeff Rowe, Guy Tsafnat, Karl Levitt	System Health and Intrusion Monitoring Using a Hierarchy of Constraints	2001		Springer		Timeframe: too old					0								572
					Debin Gao, Michael K. Reiter, Dawn Song	Behavioral Distance Measurement Using Hidden Markov Models	2006		Springer		Timeframe: too old					0								573
					Oleksiy Mazhelis, Seppo Puuronen	Characteristics and Measures for Mobile-Masquerader Detection	2006		Springer		Timeframe: too old					0								574
					Jonathon T. Giffin, Somesh Jha, Barton P. Miller	Automated Discovery of Mimicry Attacks	2006		Springer		Timeframe: too old					0								575
					Sanjay Rawat, Challa S. Sastry	Network Intrusion Detection Using Wavelet Analysis	2005		Springer		Timeframe: too old					0								576
					Le-Jun Fan, Yuan-Zhuo Wang, Jing-Yuan Li, Xue-Qi Cheng, Chuang Lin	Privacy Petri Net and Privacy Leak Software	2015		Springer		In-/Exclusion Parameter	Excluded	Fulltext	Concern	Malware Analysis, no IDS aaproach	0								577
					Zhang Fuyong, Qi Deyu	Run-time malware detection based on positive selection	2011		Springer		Timeframe: too old					0								578
					Hristo Koshutanski, Aliaksandr Lazouski, Fabio Martinelli, Paolo Mori	Enhancing grid security by fine-grained behavioral control and negotiation-based authorization	2009		Springer		In-/Exclusion Parameter	Excluded	Fulltext	Concern	Differentiates itself explicitly from IDS/ADS, presents access control solution that also monitors application behavior	0								579
					Peng Liu, Jiwu Jing, Pramote Luenam, Ying Wang, Lunquan Li, Supawadee Ingsriswang	The Design and Implementation of a Self-Healing Database System	2004		Springer		Timeframe: too old					0								580
					Vijay Anand Pandian, T. Gireesh Kumar	A Novel Cloud Based NIDPS for Smartphones	2014		Springer		In-/Exclusion Parameter	Excluded	Abstract	Concern	Network Based IDS	0								581
					Michael E. Locasto, Matthew Burnside, Angelos D. Keromytis	Online Network Forensics for Automatic Repair Validation	2008		Springer		In-/Exclusion Parameter	Excluded	Title	Network		0								582
					Haizhi Xu, Wenliang Du, Steve J. Chapin	Context Sensitive Anomaly Monitoring of Process Control Flow to Detect Mimicry Attacks and Impossible Paths	2004		Springer		Timeframe: too old					0								583
					Robert Luh, Gregor Schramm, Markus Wagner, Helge Janicke, Sebastian Schrittwieser	SEQUIN: a grammar inference framework for analyzing malicious system behavior	2018	LSWJ+18	Springer		In-/Exclusion Parameter	Excluded	Fulltext	Concern	Anomaly detection on system traces based on "Sequitur" algorithm, main goal seems to be visualization of grammar, only log analysis , monitoring only for logging, detects anomalies in log - no later behavior comparison	1.5	Yes	Yes					Partly	584
						Choosing the Right Firewall	2007		Springer		Timeframe: too old					0								585
					Lorenzo Cavallaro, R. Sekar	Anomalous Taint Detection	2008		Springer		Timeframe: too old					0								586
					P. D. Zegzhda, S. S. Kort, A. F. Suprun	Detection of anomalies in behavior of the software with usage of Markov chains	2015	ZKS15	Springer	Yes		Included	Fulltext	Exclusive	Using markov model to classify based on "operations" (groups of system calls)	1.5	Yes	Yes					Partly	587
					Jin Han, Qiang Yan, Robert H. Deng, Debin Gao	On Detection of Erratic Arguments	2012		Springer		Insufficient Quality	Included	Abstract	Exvlusive	Host based intrusion detection, relying on semantic information of programs	0.5	No	No	International Conference on Security and Privacy in Communication Systems	N/A			Partly	588
					Osama S. Faragallah, S. F. El-Zoghdy	Improved Hierarchical Key Management Scheme (IHKMS) with Three Phase Technique for Ad-Hoc Networks	2016		Springer		In-/Exclusion Parameter	Excluded	Abstract	Concern	Key Management not IDS, IDS mentioned frequently	0								589
					Alex Roichman, Ehud Gudes	DIWeDa - Detecting Intrusions in Web Databases	2008		Springer		Timeframe: too old					0								590
					Cynthia Wong, Stan Bielski, Ahren Studer, Chenxi Wang	Empirical Analysis of Rate Limiting Mechanisms	2006		Springer		Timeframe: too old					0								591
					Wuqi Wang, Zhimin Yang, Mingtao Zhang	Intrusion Detection Technology Based on Rough Set Attribute Reduction Theory	2016		Springer		In-/Exclusion Parameter	Excluded	Abstract	Concern	Network Based	0								592
					Darren Mutz, William Robertson, Giovanni Vigna, Richard Kemmerer	Exploiting Execution Context for the Detection of Anomalous System Calls	2007		Springer		Timeframe: too old	Included	Abstract	Novel	Enhances System Call based HIDS by file monitoring	0								593
					Toqeer Ali, Jawad Ali, Tamleek Ali, Mohammad Nauman, Shahrulniza Musa	Efficient, Scalable and Privacy Preserving Application Attestation in a Multi Stakeholder Scenario	2016	AAAN+16	Springer		Insufficient Quality	Included	Abstract	Exclusive	Design and implementation of a scalable dynamic remote attestation mechanism that can measure and report multiple applications	0.5	No	No	International Conference on Computational Science and its Applications	C			Partly	594
					Roberto Battistoni, Alessandro Di Biagio, Roberto Di Pietro, Matteo Formica, Luigi V. Mancini	A Live Digital Forensic system for Windows networks	2008		Springer		Timeframe: too old					0								595
					Abhinav Srivastava, Jonathon Giffin	Automatic Discovery of Parasitic Malware	2010		Springer		Timeframe: too old					0								596
					Sandro Bologna, Claudio Balducelli, Giovanni Dipoppa, Giordano Vicoli	Dependability and Survivability of Large Complex Critical Infrastructures	2003		Springer		Timeframe: too old					0								597
					Ãlvaro Herrero, Emilio Corchado, José Manuel Sáiz	Identification of Anomalous SNMP Situations Using a Cooperative Connectionist Exploratory Projection Pursuit Model	2005		Springer		Timeframe: too old					0								598
					William Enck	Defending Users against Smartphone Apps: Techniques and Future Directions	2011		Springer		In-/Exclusion Parameter	Excluded	Abstract	Form	Is a survey discussing several techniques for smartphone security	0								599
					Nai Xia, Bing Mao, Qingkai Zeng, Li Xie	Efficient and Practical Control Flow Monitoring for Program Security	2007	XMZX7	Springer		Timeframe: too old	Included	Abstract	Exclusive	"Based on the static analysis of a program, we apply very simple instrumentation of a program’s source code to encode its runtime function level control flow traces and check the correctness of the traces in the OS kernel"	0								600
					Hamed Saljooghinejad, Wilson Naik Rathore	Multi Application User Profiling for Masquerade Attack Detection	2011		Springer		Timeframe: too old					0								601
					Ahmet Salih Buyukkayhan, Alina Oprea, Zhou Li, William Robertson	Lens on the Endpoint: Hunting for Malicious Software Through Endpoint Data Analysis	2017		Springer		In-/Exclusion Parameter	Excluded	Fulltext	Concern	Not really IDS, but endpoint monitoring/analysis. Detail analysis of client installed ddls to categorize and find ddls similar to malware - no live analysis component - no IDS	0								602
					Peng Li, Debin Gao, Michael K. Reiter	Automatically Adapting a Trained Anomaly Detector to Software Patches	2009		Springer		Timeframe: too old					0								603
					Emily R. Jacobson, Andrew R. Bernat, William R. Williams, Barton P. Miller	Detecting Code Reuse Attacks with a Model of Conformant Program Execution	2014		Springer		Insufficient Quality	Included	Fulltext	Exclusive	New approach for monitoring program behavior to detect code reuse	0.5	No	No	International Symposium on Engineering Secure Software and Systems	N/A			Partly	604
					Ãlvaro Herrero, Emilio Corchado, JosÃ© Manuel SÃ¡iz	An Unsupervised Cooperative Pattern Recognition Model to Identify Anomalous Massive SNMP Data Sending	2005		Springer		Timeframe: too old					0								605
					Giorgio Giacinto	Moving Targets	2010		Springer		In-/Exclusion Parameter	Excluded	Fulltext	Form	Survey	0								606
					Marco Pistoia, Francesco Logozzo	Program Analysis for Security and Privacy	2007		Springer		Timeframe: too old					0								607
					Abhinav Srivastava, Andrea Lanzi, Jonathon Giffin, Davide Balzarotti	Operating System Interface Obfuscation and the Revealing of Hidden Operations	2011		Springer		Timeframe: too old					0								608
					Grégoire Jacob, Hervé Debar, Eric Filiol	Behavioral detection of malware: from a survey towards an established taxonomy	2008		Springer		Timeframe: too old					0								609
					Nancy R. Mead, Richard C. Linger, John McHugh, Howard F. Lipson	Managing Software Development for Survivable Systems	2001		Springer		Timeframe: too old					0								610
					Shree Garg, Sateesh K. Peddoju, Anil K. Sarje	Network-based detection of Android malicious apps	2017		Springer		In-/Exclusion Parameter	Excluded	Abstract	Concern	Network based	0								611
					Wanyu Zang, Meng Yu	A Dead-Lock Free Self-healing Algorithm for Distributed Transactional Processes	2006		Springer		Timeframe: too old					0								612
					Angelos D. Keromytis	Characterizing Software Self-healing Systems	2007		Springer		Timeframe: too old					0								613
					Wei-Jen Li, Salvatore Stolfo, Angelos Stavrou, Elli Androulaki, Angelos D. Keromytis	A Study of Malcode-Bearing Documents	2007		Springer		Timeframe: too old					0								614
					H. Gunes Kayacik, Malcolm Iain Heywood, A. Nur Zincir-Heywood	Evolving Buffer Overflow Attacks with Detector Feedback	2007		Springer		In-/Exclusion Parameter	Excluded	Abstract	Concern	Shows how to evolve mimicry attacks to evade a detection mechanism.	0								615
					Chang, Xiang Shen, Huang, Guo Zhang, Deng, Guo Feng, Zhen, Fu Cao, Ji, Wu Huang	Survey of information security	2007		Springer		Timeframe: too old					0								616
					Mariette Awad, Rahul Khanna	Machine Learning in Action: Examples	2015		Springer		In-/Exclusion Parameter	Excluded	Fulltext	Concern	No new approach, not peer reviewed, text book character	0								617
					Janak Parekh, Gail Kaiser, Philip Gross, Giuseppe Valetto	Retrofitting Autonomic Capabilities onto Legacy Systems	2006		Springer		Timeframe: too old					0								618
					Fairuz Amalina Narudin, Ali Feizollah, Nor Badrul Anuar, Abdullah Gani	Evaluation of machine learning classifiers for mobile malware detection	2016		Springer		In-/Exclusion Parameter	Excluded	Fulltext	Concern	Network based approach (TCP/IP traffic analysis=	0								619
					Matt Fredrikson, Mihai Christodorescu, Jonathon Giffin, Somesh Jhas	A Declarative Framework for Intrusion Analysis	2010	Fred1	Springer		Timeframe: too old	Included	Abstract	0	"SLog that presents a system administrator with all of the facilities required to analyze the event information present in system logs; also surveys existing techniques"	0								620
					Brian Witten, Carey Nachenberg	Malware Evolution: A Snapshot of Threats and Countermeasures in 2005	2007		Springer		Timeframe: too old					0								621
					Meng Zhang, Anand Raghunathan, Niraj K. Jha	A defense framework against malware and vulnerability exploits	2014	ZRJ14	Springer	Yes		Included	Fulltext	Exclusive	Introduces framework for behavioral intrusion detection, first analyze app, build behavior model, monitor on deployed system	1.5	Yes	Yes					Partly	622
					Yonglong Wei, Xiaojuan Zheng, Jinglei Ren, Xudong Zheng, Chen Sun, Zhenhao Li	Verification of Security-Relevant Behavior Model and Security Policy for Model-Carrying Code	2009		Springer		Timeframe: too old					0								623
					Fajiang Yu, Yue Yu	Static analysis-based behavior model building for trusted computing dynamic verification	2010		Springer		Timeframe: too old					0								624
					Ulf Larson, Emilie Lundin-Barse, Erland Jonsson	METAL â€“ A Tool for Extracting Attack Manifestations	2005		Springer		Timeframe: too old					0								625
					Xinyuan Wang, Xuxian Jiang	Artificial Malware Immunization Based on Dynamically Assigned Sense of Self	2011		Springer		Timeframe: too old					0								626
					Emilio CorchadoÃlvaro Herrero, JosÃ© Manuel SÃ¡iz	Detecting Compounded Anomalous SNMP Situations Using Cooperative Unsupervised Pattern Recognition	2005		Springer		Timeframe: too old					0								627
					Sri Parameswaran, Tilman Wolf	Embedded systems securityâ€”an overview	2008		Springer		Timeframe: too old					0								628
					Matthew Fredrikson, Mihai Christodorescu, Somesh Jha	Dynamic Behavior Matching: A Complexity Analysis and New Approximation Algorithms	2011		Springer		Timeframe: too old					0								629
					Min-Woo Park, Young-Hyun Choi, Jung-Ho Eom, Tai-Myoung Chung	The Permission-Based Malicious Behaviors Monitoring Model for the Android OS	2013		Springer		In-/Exclusion Parameter	Excluded	Fulltext	Concern	No A/IDS approach, AD only mentioned	0								630
					Zigang Cao, Gang Xiong, Yong Zhao, Zhenzhen Li, Li Guo	A Survey on Encrypted Traffic Classification	2014		Springer		In-/Exclusion Parameter	Excluded	Title	Form	Survey	0								631
					Seongje Cho, Chulyean Chang, Joonmo Kim, Jongmoo Choi	A Study on Monitoring and Protecting Computer System against Interception Threat	2003		Springer		Timeframe: too old					0								632
					Max Bhatia, Mritunjay Kumar Rai	Identifying P2P traffic: A survey	2017		Springer		In-/Exclusion Parameter	Excluded	Title	Form	Survey	0								633
					Hedi Benzina, Jean Goubault-Larrecq	Some Ideas on Virtualized System Security, and Monitors	2011		Springer		Timeframe: too old					0								634
					Abdelouahid Derhab, Kashif Saleem, Ahmed Youssef, Mohamed Guerroumi	Preventive Policy Enforcement with Minimum User Intervention Against SMS Malware in Android Devices	2016		Springer		In-/Exclusion Parameter	Excluded	Fulltext	Concern	Security policy engine, compared to IDS, no approach	0								635
					Ying Xia, Kevin Fairbanks, Henry Owen	Visual Analysis of Program Flow Data with Data Propagation	2008		Springer		Timeframe: too old					0								636
					Charu C. Aggarwal	Applications of Frequent Pattern Mining	2014		Springer		In-/Exclusion Parameter	Excluded	Fulltext	Concern	Frequent pattern mining general overview, no IDS approaches	0								637
					Danilo Bruschi, Lorenzo Cavallaro, Andrea Lanzi	Static Analysis on x86 Executables for Preventing Automatic Mimicry Attacks	2007		Springer		Timeframe: too old					0								638
					Muhammad Fermi Pasha, Rahmat Budiarto, Mohammad Syukur, Masashi Yamada	Adaptive Real-Time Network Monitoring System: Detecting Anomalous Activity with Evolving Connectionist System	2007		Springer		Timeframe: too old					0								639
					Cholmin Kim, Wonil Kim, Manpyo Hong	Effective Detector Set Generation and Evolution for Artificial Immune System	2004		Springer		Timeframe: too old					0								640
					Mihai Christodorescu Dr., Vinod Ganapathy Dr.	Dynamic Analysis	2011		Springer		Timeframe: too old					0								641
					Kwok Ho Law, Lam For Kwok	IDS False Alarm Filtering Using KNN Classifier	2005		Springer		Timeframe: too old					0								642
					Andrea Pugliese, Antonino Rullo, Antonio Piccolo	The AC-Index: Fast Online Detection ofÂ Correlated Alerts	2015		Springer		In-/Exclusion Parameter	Excluded	Fulltext	Concern	Concerned with alert correlation and attack modeling, post-processing for IDS alerts, no separate IDS approach	0								643
					Tianwei Zhang, Yinqian Zhang, Ruby B. Lee	CloudRadar: A Real-Time Side-Channel Attack Detection System in Clouds	2016		Springer		In-/Exclusion Parameter	Excluded	Fulltext	Concern	Not application behavior	0								644
					Stefan Katzenbeisser, Johannes Kinder, Helmut Veith	Malware Detection	2011		Springer		Timeframe: too old					0								645
					Sébastien Varrette, Benoît Bertholon, Pascal Bouvry	A Signature Scheme for Distributed Executions Based on Control Flow Analysis	2012		Springer		Insufficient Quality	Included	Abstract	Exclusive	Monitor control flow of program	0.5	No	No	Conference on Security and Intelligent Information Systems	N/A			Partly	646
					Lingguang Lei, Jianhua Sun, Kun Sun, Chris Shenefiel, Rui Ma, Yuewu Wang, Qi Li	SPEAKER: Split-Phase Execution of Application Containers	2017		Springer		Insufficient Quality	Included	Abstract	Novel	Monitor, reduce system calls available to docker containers (many syscalls only used during startup, dynamically remove when no longer needed), expansion of seccomp, not classical IDS,more like access control?	0.5	No	No	International Conference on Detection of Intrusions and Malware, and Vulnerability Assessment	C			Partly	647
					Peng Sun, Minlan Yu, Michael J. Freedman, Jennifer Rexford, David Walker	HONE: Joint Host-Network Traffic Management in Software-Defined Networks	2015		Springer		In-/Exclusion Parameter	Excluded	Abstract	Concern	Not intusion detection but network optimizatio	0								648
					Hyung Chan Kim, Wook Shin, R. S. Ramakrishna, Kouichi Sakurai	Design and Implementation of an Extended Reference Monitor for Trusted Operating Systems	2006		Springer		Timeframe: too old					0								649
					A. A. Grusho, M. I. Zabezhailo, A. A. Zatsarinnyi, V. O. Piskovskii, S. V. Borokhov	On the potential applications of data mining for information security provision of cloud-based environments	2015		Springer		In-/Exclusion Parameter	Excluded	Abstract	Form	Survey	0								650
					Anjum Iqbal, Mohd Aizani Maarof	Towards Danger Theory Based Artificial APC Model: Novel Metaphor for Danger Susceptible Data Codons	2004		Springer		Timeframe: too old					0								651
					Gerardo Canfora, Corrado Aaron Visaggio	A set of features to detect web security threats	2016		Springer		In-/Exclusion Parameter	Excluded	Abstract	Concern	Website analysis for malicious content - maybe this is application behavior also? Exclude in parameters	0								652
					T. H. Yu, B. W. Fuller, J. H. Bannick, L. M. Rossey, R. K. Cunningham	Integrated Environment Management for Information Operations Testbeds	2008		Springer		Timeframe: too old					0								653
					Matt Sargent, Ethan Blanton, Mark Allman	Modern Application Layer Transmission Patterns from a Transport Perspective	2014		Springer		In-/Exclusion Parameter	Excluded	Abstract	Concern	No IDS approach	0								654
					James E. Just, James C. Reynolds, Larry A. Clough, Melissa Danforth, Karl N. Levitt, Ryan Maglich, Jeff Rowe	Learning Unknown Attacks â€” A Start	2002		Springer		Timeframe: too old					0								655
					Dmitry Zegzhda, Ekaterina Rudina	Virtual Environment Security Modeling	2010		Springer		Timeframe: too old					0								656
					Ruiqi Hu, Aloysius K. Mok	Detecting Unknown Massive Mailing Viruses Using Proactive Methods	2004		Springer		Timeframe: too old					0								657
					Soila P. Kavulya, Kaustubh Joshi, Felicita Di Giandomenico, Priya Narasimhan	Failure Diagnosis of Complex Systems	2012		Springer		In-/Exclusion Parameter	Excluded	Abstract	Concern	Fault detection, not security	0								658
					Diego Rughetti, Pierangelo Di Sanzo, Alessandro Pellegrini, Bruno Ciciani, Francesco Quaglia	Tuning the Level of Concurrency in Software Transactional Memory: An Overview of Recent Analytical, Machine Learning and Mixed Approaches	2015		Springer		In-/Exclusion Parameter	Excluded	Abstract	Concern	No new IDS approach	0								659
					Seyed Morteza Babamir, Reyhane Nowrouzi, Hadi Naseri	Mining Bluetooth Attacks in Smart Phones	2010		Springer		Timeframe: too old					0								660
					Stelios Sidiroglou, Angelos D. Keromytis	Execution transactions for defending against software failures: use and evaluation	2006		Springer		Timeframe: too old					0								661
					Steven P. Reiss, Alexander Tarvo	What Is My Program Doing? Program Dynamics in Programmerâ€™s Terms	2012		Springer		In-/Exclusion Parameter	Excluded	Abstract	Concern	Program behavior visualization	0								662
					Lisane Brisolara, Paulo R. Ferreira Jr., Leandro Soares Indrusiak	Application modeling for performance evaluation on event-triggered wireless sensor networks	2016		Springer		In-/Exclusion Parameter	Excluded	Abstract	Concern	Topic is performance evaluation in wireless sensor networks	0								663
					Frank Werner, David Faragó	Correctness of Sensor Network Applications by Software Bounded Model Checking	2010		Springer		Timeframe: too old					0								664
					Jonas Pfoh, Christian Schneider, Claudia Eckert	Leveraging String Kernels for Malware Detection	2013		Springer		Insufficient Quality	Included	Abstract	Exclusive	System call classificationusing SVM	0.5	No	No	International Conference on Network and System Security	B			Partly	665
					Zhenxiang Chen, Lizhi Peng, Shupeng Zhao, Lei Zhang, Shan Jing	Feature Selection Toward Optimizing Internet Traffic Behavior Identification	2014		Springer		In-/Exclusion Parameter	Excluded	Abstract	Concern	Network monitoring, not security	0								666
					Bhargava Shastry, Markus Leutner, Tobias Fiebig, Kashyap Thimmaraju, Fabian Yamaguchi, Konrad Rieck, Stefan Schmid, Jean-Pierre Seifert, Anja Feldmann	Static Program Analysis as a Fuzzing Aid	2017		Springer		In-/Exclusion Parameter	Excluded	Abstract	Concern	No Ids approach,	0								667
					Tomohiro Shioya, Yoshihiro Oyama, Hideya Iwasaki	A Sandbox with a Dynamic Policy Based on Execution Contexts of Applications	2007		Springer		Timeframe: too old					0								668
					Zhifeng Yu, Chenjia Wang, Weisong Shi	Failure-aware workflow scheduling in cluster environments	2010		Springer		Timeframe: too old					0								669
					V. Skormin, O. Shiryayeva, A. Tokhtabayev, J. Moronski	Towards Fully Automatic Defense Mechanism for a Computer Network Emulating Active Immune Response	2007		Springer		Timeframe: too old					0								670
					Britton Wolfe, Karim O. Elish, Danfeng (Daphne) Yao	Comprehensive Behavior Profiling for Proactive Android Malware Detection	2014		Springer		In-/Exclusion Parameter	Excluded	Abstract	Concern	Not IDS but malware classification	0								671
					Christos Kloukinas, George Spanoudakis	A Pattern-Driven Framework for Monitoring Security and Dependability	2007		Springer		Timeframe: too old					0								672
					Rui Abreu, Alberto GonzÃ¡lez, Peter Zoeteweij, Arjan J. C. van Gemund	Using Fault Screeners for Software Error Detection	2010		Springer		Timeframe: too old					0								673
					Anatoliy Gorbenko, Vyacheslav Kharchenko, Olga Tarasyuk, Alexey Furmanov	F(I)MEA-Technique of Web Services Analysis and Dependability Ensuring	2006		Springer		Timeframe: too old					0								674
					Dario Rossi, Elisa Sottile, Paolo Veglia	Black-box analysis of Internet P2P applications	2011		Springer		Timeframe: too old					0								675
					Harshit Shah, R. K. Shyamasundar	On Run-Time Enforcement of Policies	2007		Springer		Timeframe: too old					0								676
					Weiqin Ma, Pu Duan, Sanmin Liu, Guofei Gu, Jyh-Charn Liu	Shadow attacks: automatically evading system-call-behavior based malware detection	2012		Springer		In-/Exclusion Parameter	Excluded	Abstract	Concern	Discusses Malware detection evasion, no IDS approach	0								677
					Mohamed Elsabagh, Daniel Barbará, Dan Fleck, Angelos Stavrou	Radmin: Early Detection of Application-Level Resource Exhaustion and Starvation Attacks	2015		Springer		Insufficient Quality	Included	Fulltext	Exclusive	Early detection of resource over consumption, builds application profiles using system calls, see other paper:" On early detection of application-level resource exhaustion and starvation"	0.5	No	No	International Symposium on Recent Advances in Intrusion Detection	A	No		Partly	678
					Konrad Rieck, Thorsten Holz, Carsten Willems, Patrick DÃ¼ssel, Pavel Laskov	Learning and Classification of Malware Behavior	2008		Springer		Timeframe: too old					0								679
					Jesse Sathre, Joseph Zambreno	Automated software attack recovery using rollback andÂ huddle	2008		Springer		Timeframe: too old					0								680
					Shabnam Mirshokraie, Ali Mesbah	JSART: JavaScript Assertion-Based Regression Testing	2012		Springer		In-/Exclusion Parameter	Excluded	Abstract	Concern	Not intrusion detection	0								681
					Julien DuchÃªne, Colas Le Guernic, Eric Alata, Vincent Nicomette, Mohamed KaÃ¢niche	State of the art of network protocol reverse engineering tools	2018		Springer		In-/Exclusion Parameter	Excluded	Abstract	Concern	Network tracing survey	0								682
					Andrea Adamoli, Dmitrijs Zaparanuks, Milan Jovic, Matthias Hauswirth	Automated GUI performance testing	2011		Springer		Timeframe: too old					0								683
					Dung-Feng Yu, Hewijin Christine Jiau	SeaDoc: a self-adaptive document link provision system for framework extension tasks	2014		Springer		In-/Exclusion Parameter	Excluded	Abstract	Concern	No IDS approach	0								684
					Toqeer Ali, Muhammad Nauman, Salman Jan	Trust in IoT: dynamic remote attestation through efficient behavior capture	2017	ANJ17	Springer	Yes		Included	Fulltext	Novel	Scalable method to verify application behavior based on system calls	1.5	Yes	Yes					Partly	685
					Danilo Ardagna, Giuliano Casale, Michele Ciavotta, Juan F Pérez, Weikun Wang	Quality-of-service in cloud computing: modeling techniques and their applications	2014		Springer		In-/Exclusion Parameter	Excluded	Abstract	Concern	Survey on Cloud QoS	0								686
					Tarek Abdelzaher, Jiawei Han	A Survey of Datamining Methods for Sensor Network Bug Diagnosis	2013		Springer		In-/Exclusion Parameter	Excluded	Title	Form	Survey	0								687
					Zhilin Zhu, Xiaojian Liu	A formal framework for software faults and permissions based on unified theory of programming	2018		Springer		In-/Exclusion Parameter	Excluded	Abstract	Concern	Not mainly concerned with detection, but introduces framework for safety/security modeling	0								688
					John Zinky, Joseph Loyall, Richard Shapiro	Runtime Performance Modeling and Measurement of Adaptive Distributed Object Applications	2002		Springer		Timeframe: too old					0								689
					Asit More, Shashikala Tapaswi	Virtual machine introspection: towards bridging the semantic gap	2014		Springer		In-/Exclusion Parameter	Excluded	Abstract	Concern	Paper on Virtual Machine Introspection, mentions IDS as potential VMI benefit, no approach	0								690
					Vanish Talwar, Sujoy Basu, Raj Kumar	Architecture and Environment for Enabling Interactive Grids	2003		Springer		Timeframe: too old					0								691
					Ryan Farley, Xinyuan Wang	CodeXt: Automatic Extraction of Obfuscated Attack Code from Memory Dump	2014		Springer		In-/Exclusion Parameter	Excluded	Fulltext	Concern	No real Ids approach, but extension to IDS for pinpointing attack source code	0								692
					André Rodrigues, Tiago Camilo, Jorge Sá Silva, Fernando Boavida	Diagnostic Tools for Wireless Sensor Networks: A Comparative Survey	2013		Springer		In-/Exclusion Parameter	Excluded	Title	Form	Survey, also topic is wireless sensor networks not IDS	0								693
					Yan Wen, Jinjing Zhao, Huaimin Wang	A Novel Approach for Untrusted Code Execution	2007		Springer		Timeframe: too old					0								694
					Anil Madhavapeddy	Combining Static Model Checking with Dynamic Enforcement Using the Statecall Policy Language	2009		Springer		Timeframe: too old					0								695
					Jaeyeon Jung, Rodolfo A. Milito, Vern Paxson	On the adaptive real-time detection of fast-propagating network worms	2008		Springer		Timeframe: too old					0								696
					Craig A Lee, Alan F Sill	A design space for dynamic service level agreements in OpenStack	2014		Springer		In-/Exclusion Parameter	Excluded	Fulltext	Concern	Not mainly concerned with IDS but SLA definition, mentions anomaly detection in passing	0								697
					Anita Choudhary, Mahesh Chandra Govil, Girdhari Singh, Lalit K. Awasthi, Emmanuel S. Pilli, Divya Kapil	A critical survey of live virtual machine migration techniques	2017		Springer		In-/Exclusion Parameter	Excluded	Abstract	Concern	Not mainly concerned with IDS, only mentions it. Main concern: VM migration	0								698
					Zhaohui Wang, Ryan Johnson, Rahul Murmuria, Angelos Stavrou	Exposing Security Risks for Commercial Mobile Devices	2012		Springer		In-/Exclusion Parameter	Excluded	Abstract	Concern	Threat exploration, survey character	0								699
					Rabih Zbib, Farooq Anjum, Abhrajit Ghosh, Amjad Umar	Intrusion Tolerance in Distributed Middleware	2004		Springer		Timeframe: too old					0								700
					Otavio Silva, Alessandro Garcia, Carlos Lucena	The Reflective Blackboard Pattern: Architecting Large Multi-agent Systems	2003		Springer		Timeframe: too old					0								701
					Ladislav Balik, Josef Horalek, Ondrej Hornig, Vladimir Sobeslav, Rafael Dolezal, Kamil Kuca	Endpoint Firewall for Local Security Hardening in Academic Research Environment	2015		Springer		In-/Exclusion Parameter	Excluded	Fulltext	Concern	Network Firewall	0								702
					Naoya Maruyama, Satoshi Matsuoka	Model-based Fault Localization: Finding Behavioral Outliers in Large-scale Computing Systems	2010		Springer		Timeframe: too old					0								703
					Rodrigo Gonzalez-Alberquilla, Karin Strauss, Luis Ceze, Luis PiÃ±uel	Accelerating Data Race Detection with Minimal Hardware Support	2011		Springer		Timeframe: too old					0								704
					Enrico Budianto, Yaoqi Jia, Xinshu Dong, Prateek Saxena, Zhenkai Liang	You Canâ€™t Be Me: Enabling Trusted Paths and User Sub-origins in Web Browsers	2014		Springer		In-/Exclusion Parameter	Excluded	Abstract	Concern	Trusted paths for web application users, no IDS approach	0								705
					Mohamed S. Mansour, Karsten Schwan, Sameh Abdelaziz	I-Queue: Smart Queues for Service Management	2006		Springer		Timeframe: too old					0								706
					Matthias Neugschwandtner, Collin Mulliner, William Robertson, Engin Kirda	Runtime Integrity Checking for Exploit Mitigation on Lightweight Embedded Devices	2016		Springer		In-/Exclusion Parameter	Excluded	Abstract	Concern	Integrity checking, no IDS approach	0								707
					A. Cuomo, M. Rak, S. Venticinque, U. Villano	Enhancing an Autonomic Cloud Architecture with Mobile Agents	2012		Springer		In-/Exclusion Parameter	Excluded	Abstract	Concern	IDS no concern, only mentioned	0								708
					Bojan Simic, James Walden	Eliminating SQL Injection and Cross Site Scripting Using Aspect Oriented Programming	2013		Springer		In-/Exclusion Parameter	Excluded	Abstract	Concern	SQL vulnerability detection; noIDS	0								709
					Jiawei Han, Hong Cheng, Dong Xin, Xifeng Yan	Frequent pattern mining: current status and future directions	2007		Springer		Timeframe: too old					0								710
					Sandra Taylor, Hanan Lutfiyya	Predicting Violations of QoS Requirements in Distributed Systems	2003		Springer		Timeframe: too old					0								711
					Abhishek Verma, Ludmila Cherkasova, Roy H. Campbell	Resource Provisioning Framework for MapReduce Jobs with Performance Goals	2011		Springer		Timeframe: too old					0								712
					Nir Nissim, Robert Moskovitch, Oren Bar, Ad, Lior Rokach, Yuval Elovici	ALDROID: efficient update of Android anti-virus software using designated active learning methods	2016		Springer		In-/Exclusion Parameter	Excluded	Fulltext	Concern	Not really application behavior, more meta information, labels applications no IDS component	0								713
					Guido Salvaneschi, Mira Mezini	Towards Reactive Programming for Object-Oriented Applications	2014		Springer		In-/Exclusion Parameter	Excluded	Abstract	Concern	Reactive Programming, no IDS approach	0								714
					Ursula Goltz, Ralf H. Reussner, Michael Goedicke, Wilhelm Hasselbring, Lukas Märtin, Birgit Vogel-Heuser	Design for future: managed software evolution	2015		Springer		In-/Exclusion Parameter	Excluded	Fulltext	Concern	No new anomaly detection approach	0								715
					Tudor Marian, Hakim Weatherspoon, Ki-Suh Lee, Abhishek Sagar	Fmeter: Extracting Indexable Low-Level System Signatures by Counting Kernel Function Calls	2012		Springer		In-/Exclusion Parameter	Excluded	Abstract	Concern	Indexing behavior, not focused on security	0								716
					Christoph von Praun	Race Detection Techniques	2011		Springer		Timeframe: too old					0								717
					Lars Strandén	Agents in Safety Related Systems Including Ubiquitous Networks	2007		Springer		Timeframe: too old					0								718
					Saber Zerdoumi, Aznul Qalid Md Sabri, Amirrudin Kamsin, Ibrahim Abaker Targio Hashem, Abdullah Gani, Saqib Hakak, Mohammed Ali Al-garadi, Victor Chang	Image pattern recognition in big data: taxonomy and open challenges: survey	2017		Springer		In-/Exclusion Parameter	Excluded	Title	Form	Survey, also image recognition not IDS	0								719
					Jonathan Stuart Ward, Adam Barker	Cloud cover: monitoring large-scale clouds with Varanus	2015		Springer		In-/Exclusion Parameter	Excluded	Abstract	Concern	General monitoring, not IDS	0								720
					Davidson R. Boccardo, Tiago M. Nascimento, Raphael C. Machado, Charles B. Prado, Luiz F. R. C. Carmo	Traceability of Executable Codes Using Neural Networks	2011		Springer		Timeframe: too old					0								721
					Sven Heiberg, Arnis Parsovs, Jan Willemson	Log Analysis of Estonian Internet Voting 2013-2014	2015		Springer		In-/Exclusion Parameter	Excluded	Abstract	Concern	Not security monitoring but voting anomaly detection	0								722
					Laurent Bernaille, Renata Teixeira	Implementation Issues of Early Application Identification	2007		Springer		Timeframe: too old					0								723
					Thomas Raffetseder, Christopher Kruegel, Engin Kirda	Detecting System Emulators	2007		Springer		Timeframe: too old					0								724
NDSS	Publish or Perish, Split phrase	43185		5 (without duplicates)	T Garfinkel	Traps and Pitfalls: Practical Problems in System Call Interposition Based Security Tools.	2003		isoc.org		In-/Exclusion Parameter	Excluded	Abstract	Concern	No new IDS approach / focusses implementation specifics	0								725
					JT Giffin, S Jha, BP Miller	Efficient Context-Sensitive Intrusion Detection.	2004	GJM4	isoc.org		Timeframe: too old	Included	Abstract	Exclusive	"the first efficient statically-constructed context-sensitive model"	0								726
					R Sekar	An Efficient Black-box Technique for Defeating Web Application Attacks.	2009		isoc.org		Timeframe: too old					0								727
					N Borisov, D Brumley, HJ Wang, J Dunagan, P Joshi, ...	Generic Application-Level Protocol Analyzer and its Language.	2007		academia.edu		Timeframe: too old					0								728
					A Saberi, Y Fu, Z Lin	HYBRID-BRIDGE: Efficiently bridging the semantic gap in virtual machine introspection via decoupled execution and training memoization	2014		NDSS		In-/Exclusion Parameter	Excluded	Abstract	Concern	No IDS approach, technique for vmi	0								729
Usenix	Google: ("Intrusion Detection" OR "Anomaly Detection" OR "Application Intrusion Detection") AND ("Host-Based" OR "Application Based" OR "Application Specific" OR "Application Aware" OR "Application Sensitive") AND ("Program Behavior" OR "Application Behavior" OR "Software Behavior") filetype:pdf site:usenix.org	43186		45 (without duplicates)	Xiaoning Ding, Hai Huang, Yaoping Ruan, Anees Shaikh, Xiaodong Zhang	Automatic software fault diagnosis by exploiting application signatures	2008		Usenix		Timeframe: too old					0								730
					Debin Gao, Michael K. Reiter, Dawn Song	On gray-box program tracking for anomaly detection	2004		Usenix		In-/Exclusion Parameter	Excluded	Abstract	Form	Survey	0								731
					Ludovico Cavedon, Giovanni Vigna	Toward Automated Detection of Logic Vulnerabilities in Web Applications	2010		Usenix		Timeframe: too old					0								732
					M.Y. Chen, Anthony Accardi, E. Kiciman, Jim Lloyd, Dave Patterson, Armando Fox, Eric Brewer	Path-based faliure and evolution management	2004		Usenix		Timeframe: too old					0								733
					The Magazine of Usenix	Focus Issue : Security inside : the case for network infrastructure security	2002		Usenix		Timeframe: too old					0								734
					Linda Briesemeister, Steven Dawson, Patrick Lincoln, Hassen Saïdi, Jim Thornton, Glenn Durfee, Peter C S Kwan, Elizabeth Stinson, Adam J Oliner, John C Mitchell	Homogeneity as an Advantage: It Takes a Community to Protect an Application.	2010	BDSL1	Usenix		Timeframe: too old	Included	Fulltext	0		0								735
					Various	USENIX ATCâ€™ 16 Conference Proceedings	2016		Usenix		In-/Exclusion Parameter	Excluded	Fulltext	Concern	No Ids approaches found, full conference proceedings	0								736
					R Smith, B Slater, M W Darlington	Conference reports	1989		Usenix		Timeframe: too old					0								737
						2014 USENIX Annual Technical Conference Thanks to Our USENIX ATC â€™ 14 Sponsors Gold Sponsors	2014		Usenix		In-/Exclusion Parameter	Excluded	Abstract	Concern	Conference proceedings, no paper with intrusion/anomaly detection approaches	0								738
						11th International Conference on Autonomic Computing, Proceedings	2014		Usenix		In-/Exclusion Parameter	Excluded	Abstract	Concern	Full conference proceedings, no contained papaer deals with anomaly/intrusion detection from a security standpoint	0								739
					Sean Barker, Yun Chi, Hakan Hacιgumuş, Prashant Shenoy, Emmanuel Cecchet	ShuttleDB: Database-Aware Elasticity in the Cloud	2014		Usenix		In-/Exclusion Parameter	Excluded	Abstract	Concern	Cloud Elasticity management, not IDS	0								740
					Anup K. Ghosh, Aaron Schwartzbard	A Study in Using Neural Networks for Anomaly and Misuse Detection	1999		Usenix		Timeframe: too old					0								741
					Xueyuan Han, Thomas Pasquier, Tanvi Ranjan, Mark Goldstein, Margo Seltzer	FRAPpuccino: Fault-detection through Runtime Analysis of Provenance	2017	HPRG+17	Usenix		Insufficient Quality	Included	Abstract	Exclusive	Provenance-based -> many instances of a system; legitimate behavior is inferred from majority	0.5	No	No	USENIX Workshop on Hot Topics in Cloud Computing	N/A			Partly	742
					Selvi Kadirvel, Jeffrey Ho, José A B Fortes	Fault Management in Map-Reduce Through Early Detection of Anomalous Nodes	2013		Usenix		In-/Exclusion Parameter	Excluded	Abstract	Concern	Fault detection in MapReduce, not security	0								743
					San Francisco, David Martin, Andrew Schulman	Proceedings of the 11 th USENIX Security Symposium	2002		Usenix		Timeframe: too old					0								744
					Rodrigo Fonseca, Michael J Freedman, George Porter	Experiences with tracing causality in networked services	2010		Usenix		Timeframe: too old					0								745
					San Jose	NSDI â€™ 10 : 7th USENIX Symposium on Networked Systems Design and Implementation	2010		Usenix		Timeframe: too old					0								746
					M. E. Locasta, A. Stavrou, G. F. Cretu, A. D. Keromytis	From STEM to SEAD: Speculative Execution for Automatic Defense	2007		Usenix		Timeframe: too old					0								747
					Rekha Bachwani, Olivier Crameri, Ricardo Bianchini, Willy Zwaenepoel	Mojave : A Recommendation System for Software Upgrades	2012		Usenix		In-/Exclusion Parameter	Excluded	Abstract	Concern	Automatically recommending fitting software updates, no IDS approach	0								748
					Xiao Ma, Peng Huang, Xinxin Jin, Pei Wang, Soyeon Park	eDoctor: automatically diagnosing abnormal battery drain issues on smartphones	2013		Usenix		In-/Exclusion Parameter	Excluded	Abstract	Concern	Not A/IDS, but battery drain issue detection	0								749
					Christopher Kruegel, Engin Kirda, Darren Mutz, William Robertson, Giovanni Vigna	Automating Mimicry Attacks Using Static Binary Analysis	2005		Usenix		In-/Exclusion Parameter	Excluded	Abstract	Focus	Focusses IDS Evasion via Mimicry Attacks	0								750
					Sponsored By	LISA â€™ 11 : 25th Large Installation System Administration Conference	2011		Usenix		Timeframe: too old					0								751
					San Francisco, Albert Greenberg	Proceedings of the First Symposium on Networked Systems Design and Implementation	2004		Usenix		Timeframe: too old					0								752
					Clemens Kolbitsch, Paolo Milani Comparetti, Christopher Kruegel, Engin Kirda, Xiaoyong Zhou, Xiaofeng Wang, U C Santa Barbara, Sophia Antipolis	Effective and Efficient Malware Detection at the End Host	2009		Usenix		Timeframe: too old					0								753
					H Inoue, D Jansens, A Hijazi, A Somayaji	NetADHICT: A Tool for Understanding Network Traffic.	2007		Usenix		Timeframe: too old					0								754
					Niels Provos	12th USENIX Security Symposium Improving Host Security with System Call Policies	2003		Usenix		Timeframe: too old					0								755
					All Rights Reserved	5th Symposium on Operating Systems Design and Implementation Defensive Programming : Using an Annotation Toolkit to Build	2002		Usenix		Timeframe: too old					0								756
					Swapnil Patil, Anand Kashyap, Gopalan Sivathanu, Erez Zadok	I3FS : An In-Kernel Integrity Checker and Intrusion Detection File System	2004		Usenix		Timeframe: too old					0								757
					Silas Boyd-wickizer, Austin T Clements, Yandong Mao, Aleksey Pesterev, M Frans Kaashoek, Robert Morriss, Brad Chen, Carl Waldspurger, Jay Wylie, Felipe Cabrera, George Candea, Bryan Ford, Ariel Feldman	p roceedi ngs 9th USENIX Symposium on Operating Systems Design and Implementation	2010		Usenix		Timeframe: too old					0								758
					Roberto Paleari, Lorenzo Martignoni, Emanuele Passerini, Drew Davidson, Matt Fredrikson, Jonathon T Giffin, Somesh Jha	Automatic Generation of Remediation Procedures for Malware Infections	2010		Usenix		Timeframe: too old					0								759
					Jason Flinn, Hank Levy, George Candea, Allen Clement, Landon Cox, Nick Feamster, Bryan Ford, Kathryn Mckinley, Ed Nightingale, Timothy Roscoe, Doug Terry, Willy Zwaenepoel, Hakim Weatherspoon, Matt Welsh, John Wilkes, Brad Chen, Casey Henderson	11th USENIX Symposium on Operating Systems Design and Implementation ( OSDI 14 ), Proceedings	2014		Usenix		In-/Exclusion Parameter	Excluded	Abstract	Concern	Conference proceedings, no paper dealing with detection of security intrusions/detection	0								760
					Fareha Shafique, Kenneth Po, Ashvin Goel	Correlating multi-session attacks via replay	2006		Usenix		Timeframe: too old					0								761
					All Rights Reserved	12th USENIX Security Symposium	2003		Usenix		Timeframe: too old					0								762
					Angelos Oikonomopoulos, Elias Athanasopoulos, Herbert Bos, Cristiano Giuffrida	Poking Holes in Information Hiding	2016		Usenix		In-/Exclusion Parameter	Excluded	Abstract	Concern	No IDS approach, discusses the security of ASLR	0								763
					Canada August	Proceedings of the 25th USENIX Security Symposium Thanks to Our USENIX Security â€™ 16 Sponsors Thanks to Our USENIX Supporters	2016		Usenix		In-/Exclusion Parameter	Excluded	Fulltext	Concern	No HIDS appl-aware approach, one IDS paper: Fingerprinting Electronic Control Units for Vehicle Intrusion Detection	0								764
						19th Usenix Security Symposium Advertisement	2010		Usenix		Timeframe: too old					0								765
					Ding Yuan, Yinglian Xie, Rina Panigrahy, Junfeng Yang, Chad Verbowski, Arunvijay Kumar	Context-based Online Configuration-Error Detection	2011		Usenix		Timeframe: too old					0								766
					Hayawardh Vijayakumar, Joshua Schiffman, Trent Jaeger	STING : Finding Name Resolution Vulnerabilities in Programs	2012		Usenix		In-/Exclusion Parameter	Excluded	Abstract	Concern	Tests for specific vulnerabilities	0								767
					Kapil Singh, Sumeer Bhola, Wenke Lee	xBook: redesigning privacy control in social networking platforms	2009		Usenix		Timeframe: too old					0								768
					San Diego, Yi-min Wang, Chad Verbowski, John Dunagan, Yu Chen, Helen J Wang, Chun Yuan	Proceedings of the 17 th Large Installation Systems Administration Conference STRIDER : A Black-box , State-based Approach to Change and Configuration Management and Support	2003		Usenix		Timeframe: too old					0								769
					Helen J Wang, John C Platt, Yu Chen, Ruyun Zhang, Yi-min Wang	Automatic Misconfiguration Troubleshooting with PeerPressure	2004		Usenix		Timeframe: too old					0								770
					F Sun, L Xu, Z Su	Static Detection of Access Control Vulnerabilities in Web Applications.	2011		Usenix		Timeframe: too old					0								771
					Kyriakos K. Ispoglou	malWASH: Washing malware to evade dynamic analysis	2016		Usenix		In-/Exclusion Parameter	Excluded	Abstract	Concern	Opposite of IDS: hiding malware execution	0								772
ACM	Advanced Search - Show Search Query: content.ftsec:(+("Application Intrusion Detection" "Intrusion Detection" "Anomaly Detection") +("Host-Based" "Application Based" "Application Specific" OR "Application Aware" OR "Application Sensitive") +("Program Behavior" "Application Behavior" "Software Behavior"))	43571	2018-2019	8	Arun Nagaraja, Shadi Aljawarneh, Prabhakara H. S	PAREEKSHA: A Machine Learning Approach for Intrusion and Anomaly Detection	2018		ACM		In-/Exclusion Parameter	Excluded	Abstract	Concern	Network based IDS (mentions KDD Cup Dataset)	0	No	No	International Conference on Data Science, E-learning and Information Systems	N/A				773
					Ming Liu, Zhi Xue, Xianghua Xu, Changmin Zhong, Jinjun Chen	Host-Based Intrusion Detection System with System Calls: Review and Future Trends	2018		ACM		In-/Exclusion Parameter	Excluded	Abstract	Form	Survey, presents and reviews current HIDS approaches and gives future trends	1	Yes	Yes						774
					Md Amran Siddiqui, Alan Fern, Thomas G. Dietterich, Ryan Wright, Alec Theriault, David W. Archer	Feedback-Guided Anomaly Discovery via Online Optimization	2018		ACM		Insufficient Quality	Included	Fulltext	Novel	Novel approach for human assisted anomaly deteciton, unclear on type of data used (system events)	1	No	No	International Conference on Knowledge Discovery & Data Mining	N/A			Yes	775
					Sixing Lu, Roman Lysecky	Data-driven Anomaly Detection with Timing Features for Embedded Systems	2019	LL19	ACM	Yes		Included	Abstract	Novel	Presents approach for anomaly detection in embedded systems, using timing information, cache misses	2	Yes	Yes					Yes	776
					Shachee Mishra, Michalis Polychronakis	Shredder: Breaking Exploits Through API Specialization	2018		ACM		Insufficient Quality	Included	Abstract	Novel	Static analysis and active response	0.5	No	No	Computer Security Applications Conference	National:USA			Partly	777
					Mohsin Junaid, Jiang Ming, David Kung	StateDroid: Stateful Detection of Stealthy Attacks in Android Apps via Horn-Clause Verification	2018		ACM		Insufficient Quality	Included?				0	No	No	Annual Computer Security Applications Conference	National:USA				778
					Ferdin, Brasser, Lucas Davi, Abhijitt Dhavlle, Tommaso Frassetto, Sai Manoj Pudukotai Dinakarrao, Setareh Rafatirad, Ahmad-Reza Sadeghi, Avesta Sasan, Hossein Sayadi, Shaza Zeitouni, Houman Homayoun	Advances and Throwbacks in Hardware-assisted Security: Special Session	2018		IEEE Press		Insufficient Quality	Included?				0	No	No	International Conference on Compilers, Architecture and Synthesis for Embedded Systems	A	No			779
					Vaibhavi Kalgutkar, Ratinder Kaur, Hugo Gonzalez, Natalia Stakhanova, Alina Matyukhina	Code Authorship Attribution: Methods and Challenges	2019		ACM		In-/Exclusion Parameter	Excluded	Fulltext	Concern	Not mainly concerned with intrusion detection, only as an aside	1	Yes	Yes						780
IEEE	Advanced Search - Command Search - Full Text & Metadata: ("Intrusion Detection" OR "Anomaly Detection" OR "Application Intrusion Detection") AND ("Host-Based" OR "Application Based" OR "Application Specific" OR "Application Aware" OR "Application Sensitive") AND ("Program Behavior" OR "Application Behavior" OR "Software Behavior")	43571	2018-2019	23	M. S. Gill, D. Lindsog, P. Zavarsky	Profiling Network Traffic Behavior for the Purpose of Anomaly-Based Intrusion Detection	2018		IEEE		In-/Exclusion Parameter	Excluded	Title	Concern	Network	0	No	No	International Conference On Trust, Security And Privacy In Computing And Communications	A	No			781
					G. Betarte, E. Gimenez, R. Martinez, A. Pardo	Improving Web Application Firewalls through Anomaly Detection	2018		IEEE		Insufficient Quality	Included?				0	No	No	International Conference on Machine Learning and Applications	C				782
					L. Cheng, K. Tian, D. Yao, L. Sha, R. A. Beyah	Checking is Believing: Event-Aware Program Anomaly Detection in Cyber-Physical Systems	2019		IEEE		In-/Exclusion Parameter	Excluded	Abstract	Form	[EarlyAccess Title] Novel anomaly detection focused on data driven attacks on CPS	1	Yes	Yes						783
					Y. Xie, D. Feng, Y. Hu, Y. Li, S. Sample, D. Long	Pagoda: A Hybrid Approach to Enable Efficient Real-time Provenance Based Intrusion Detection in Big Data Environments	2018		IEEE		In-/Exclusion Parameter	Excluded	Abstract	Form	[EarlyAccess Title] Intrusion detection based on provenance graphs	1	Yes	Yes						784
					H. H. Al-Maksousy, M. C. Weigle, C. Wang	NIDS: Neural Network based Intrusion Detection System	2018		IEEE		Insufficient Quality	Included?				0	No	No	International Symposium on Technologies for Homeland Security	N/A				785
					M. Levi, Y. Allouche, A. Kontorovich	Advanced Analytics for Connected Car Cybersecurity	2018		IEEE		Insufficient Quality	Included?				0	No	No	Vehicular Technology Conference	B				786
					R. Hofstede, A. Pras, A. Sperotto, G. D. Rodosek	Flow-Based Compromise Detection: Lessons Learned	2018		IEEE		In-/Exclusion Parameter	Excluded	Fulltext	Concern	Network based monitoring	1	Yes	Yes						787
					Solutions	A Survey on Security of Cloud Environment: Threats	2018		IEEE		In-/Exclusion Parameter	Excluded	Title	Form	Survey	0								788
					Z. Tian, Y. Cui, L. An, S. Su, X. Yin, L. Yin, X. Cui	A Real-Time Correlation of Host-Level Events in Cyber Range Service for Smart Campus	2018		IEEE		In-/Exclusion Parameter	Excluded	Fulltext	Concern	Mainly concerned with cyber security training and machine introspection - not intrusion detection	1	Yes	Yes						789
					A. Taherkordi, F. Zahid, Y. Verginadis, G. Horn	Future Cloud Systems Design: Challenges and Research Directions	2018		IEEE		In-/Exclusion Parameter	Excluded	Abstract	Concern	Not mainly IDS, but cloud computing and survey on research topics	1	Yes	Yes						790
					S. Arshad, M. A. Shah, A. Wahid, A. Mehmood, H. Song, H. Yu	SAMADroid: A Novel 3-Level Hybrid Malware Detection Model for Android Operating System	2018		IEEE		Insufficient Quality	Included	Fulltext	Novel	Describes multiple approaches, malware detection, detection is done on server and communicated to client, monitoring in background	0								791
					J. Payton, X. Du, X. He, J. Wu	Envisioning an Information Assurance and Performance Infrastructure for the Internet of Things	2018		IEEE		In-/Exclusion Parameter	Excluded	Abstract	Concern	IDS not main concern	0	No	No	International Conference on Collaboration and Internet Computing	N/A				792
					J. Ni, K. Zhang, X. Lin, X. S. Shen	Securing Fog Computing for Internet of Things Applications: Challenges and Solutions	2018		IEEE		In-/Exclusion Parameter	Excluded	Abstract	Concern	Not mainly IDS but fog computing and some security issues in fog computing	1	Yes	Yes						793
					G. Betarte, A. Pardo, R. Martinez	Web Application Attacks Detection Using Machine Learning Techniques	2018		IEEE		Insufficient Quality	Included?				0	No	No	IEEE International Conference on Machine Learning and Applications	C				794
					J. Garcia, A. Brunstrom	Clustering-based separation of media transfers in DPI-classified cellular video and VoIP traffic	2018		IEEE		In-/Exclusion Parameter	Excluded	Title	Concern	Image Processing, not IDS topic	0	No	No	Wireless Communications and Networking Conference	B				795
					H. Hu, J. Wu, Z. Wang, G. Cheng	Mimic defense: a designed-in cybersecurity defense framework	2018		IET		In-/Exclusion Parameter	Excluded	Fulltext	Concern	Not IDS, builds theoretical framework to model computer systems and their functions	1	Yes	Yes						796
					J. Wadden, T. Tracy, E. Sadredini, L. Wu, C. Bo, J. Du, Y. Wei, J. Udall, M. Wallace, M. Stan, K. Skadron	AutomataZoo: A Modern Automata Processing Benchmark Suite	2018		IEEE		In-/Exclusion Parameter	Excluded	Abstract	Concern	Benchmarking, not IDS	0	No	No	International Symposium on Workload Characterization	N/A				797
					A. Alshamrani, S. Myneni, A. Chowdhary, D. Huang	A Survey on Advanced Persistent Threats: Techniques, Solutions, Challenges, and Research Opportunities	2019		IEEE		In-/Exclusion Parameter	Excluded	Title	Form	Survey	1	Yes	Yes						798
					W. Lin, C. Krintz, R. Wolski, M. Zhang, X. Cai, T. Li, W. Xu	Tracking Causal Order in AWS Lambda Applications	2018		IEEE		Insufficient Quality	Included?				0	No	No	International Conference on Cloud Engineering	N/A				799
					C. Delimitrou, C. Kozyrakis	Uncovering the Security Implications of Cloud Multi-Tenancy with Bolt	2018		IEEE		In-/Exclusion Parameter	Excluded	Abstract	Concern	Not concerned with attack detection, but identifying multi tenant cloud workloads to enable novel attacks	1	Yes	Yes						800
					F. Brasser, L. Davi, A. Dhavlle, T. Frassetto, S. M. P. Dinakarrao, S. Rafatirad, A. Sadeghi, A. Sasan, H. Sayadi, S. Zeitouni, H. Homayoun	Special Session: Advances and Throwbacks in Hardware-Assisted Security	2018		IEEE		Insufficient Quality	Included?				0	No	No	International Conference on Compilers, Architectures and Synthesis for Embedded Systems	A	No			801
					M. T. Khan, D. Serpanos, H. Shrobe	ARMET: Behavior-Based Secure and Resilient Industrial Control Systems	2018		IEEE		In-/Exclusion Parameter	Excluded	Fulltext	Concern	Anomaly detection for Industrial Control Systems, using sensor data of control units to estimate state of system and correct/detect errors	0								802
					Z. Tian, W. Shi, Y. Wang, C. Zhu, X. Du, S. Su, Y. Sun, N. Guizani	Real Time Lateral Movement Detection based on Evidence Reasoning Network for Edge Computing Environment	2019		IEEE		In-/Exclusion Parameter	Excluded	Title	Form	[PrePrint - Exclude] Novel monitoring and event correlation to detect intrusions, system call monitoring	1	Yes	Yes						803
Sciencedirect	Split Search due to length limitation			20	Marwa Elsayed, Mohammad Zulkernine	Offering security diagnosis as a service for cloud SaaS applications	2019		Elsevier		In-/Exclusion Parameter	Excluded	Fulltext	Concern	Not intrusion detection, but introduces a central trusted entitity to ensure secure end to end information flow using static information flow analysis	1	Yes	Yes						804
	("Intrusion Detection" OR "Anomaly Detection" OR "Application Intrusion Detection") AND ("Host-Based" OR "Application Based" OR "Application Specific" OR "Application Aware" OR "Application Sensitive") AND ("Program Behavior")				Sen Chen, Minhui Xue, Lingling Fan, Shuang Hao, Lihua Xu, Haojin Zhu, Bo Li	Automated poisoning attacks and defenses in malware detection systems: An adversarial machine learning approach	2018		Elsevier		In-/Exclusion Parameter	Excluded	Fulltext	Concern	No live monitoring but disassebling and static analysis of applications to find malware, However, interesting API call approach	0								805
	("Intrusion Detection" OR "Anomaly Detection" OR "Application Intrusion Detection") AND ("Host-Based" OR "Application Based" OR "Application Specific" OR "Application Aware" OR "Application Sensitive") AND ("Application Behavior")				Indraneel Sreeram, Venkata Praveen Kumar Vuppala	HTTP flood attack detection in application layer using machine learning metrics and bio inspired bat algorithm	2019		Elsevier		In-/Exclusion Parameter	Excluded	Abstract	Concern	Network level monitoring	0								806
	("Intrusion Detection" OR "Anomaly Detection" OR "Application Intrusion Detection") AND ("Host-Based" OR "Application Based" OR "Application Specific" OR "Application Aware" OR "Application Sensitive") AND ("Software Behavior")				N N Srinidhi, S M Dilip Kumar, K R Venugopal	Network optimizations in the Internet of Things: A review	2019		Elsevier		In-/Exclusion Parameter	Excluded	Abstract	Concern	Main topic not intrusion detection, no new I/AD approach	1	Yes	Yes						807
					Nir Nissim, Yuval Lapidot, Aviad Cohen, Yuval Elovici	Trusted system-calls analysis methodology aimed at detection of compromised virtual machines using sequential mining	2018		Elsevier		In-/Exclusion Parameter	Excluded	Title	Availability	No access through uniiversity library library	1	Yes	Yes						808
					Federico Lombardi, Andrea Muti, Leonardo Aniello, Roberto Baldoni, Silvia Bonomi, Leonardo Querzoni	PASCAL: An architecture for proactive auto-scaling of distributed services	2019		Elsevier		In-/Exclusion Parameter	Excluded	Title	Availability	No access through uniiversity library library	1	Yes	Yes						809
					Nir Nissim, Yuval Lapidot, Aviad Cohen, Yuval Elovici	Trusted system-calls analysis methodology aimed at detection of compromised virtual machines using sequential mining	2018		Elsevier		In-/Exclusion Parameter	Excluded	Title	Availability	Duplicate; No access through uniiversity library library	0								810
					Denis Shaykhislamov, Vadim Voevodin	An approach for dynamic detection of inefficient supercomputer applications	2018		Elsevier		In-/Exclusion Parameter	Excluded	Abstract	Concern	Main concern efficiency, not security -> however suspicious behavior identified using anomaly detection method	1	Yes	Yes						811
					Upasana Sarmah, D K Bhattacharyya, J K Kalita	A survey of detection methods for XSS attacks	2018		Elsevier		In-/Exclusion Parameter	Excluded	Title	Form	Survey	1	Yes	Yes						812
					Piroska Haller, BÃ©la Genge, Adrian-Vasile Duka	On the practical integration of anomaly detection techniques in industrial control applications	2019		Elsevier		In-/Exclusion Parameter	Excluded	Abstract	Concern	Not strictly application aware, since only single task is monitored in order to detect system wide anomalies. Anomaly detection for ICS, outlines strategy and proposes simple, effective AD method	1	Yes	Yes						813
					Arpita Jadhav Bhatt, Chetna Gupta, Sangeeta Mittal	iABC-AL: Active learning-based privacy leaks threat detection for iOS applications	2018		Elsevier		In-/Exclusion Parameter	Excluded	Fulltext	Concern	No monitoring, but app malware classification using machine learning (static analysis?!)	1	Yes	Yes						814
					Jemal Abawajy, Shamsul Huda, Shaila Sharmeen, Mohammad Mehedi Hassan, Ahmad Almogren	Identifying cyber threats to mobile-IoT applications in edge computing paradigm	2018		Elsevier		In-/Exclusion Parameter	Excluded	Fulltext	Concern	Presents survey and methodology for classifying apps as benign or malicious - only short description of methodology - not monitoring but just static analysis (claims hybrid approach, but is not)	1	Yes	Yes						815
					Mohd Faizal Ab Razak, Nor Badrul Anuar, Rosli Salleh, Ahmad Firdaus, Muhammad Faiz, Hammoudeh S Alamri	"Less Give More": Evaluate and zoning Android applications	2019		Elsevier		In-/Exclusion Parameter	Excluded	Fulltext	Concern	No behavior monitorin, static classification of malware	1	Yes	Yes						816
					Luigi Coppolino, Salvatore Dâ€™Antonio, Giovanni Mazzeo, Luigi Romano	A comparative analysis of emerging approaches for securing java software with Intel SGX	2019		Elsevier		In-/Exclusion Parameter	Excluded	Title	Availability	No access through uniiversity library library	1	Yes	Yes						817
					Jelena Milosevic, Miroslaw Malek, Alberto Ferrante	Time, accuracy and power consumption tradeoff in mobile malware detection systems	2019		Elsevier		In-/Exclusion Parameter	Excluded	Title	Availability	No access through uniiversity library library	1	Yes	Yes						818
					Krzysztof Cabaj, Marcin Gregorczyk, Wojciech Mazurczyk	Software-defined networking-based crypto ransomware detection using {HTTP} traffic characteristics	2018		Elsevier		In-/Exclusion Parameter	Excluded	Abstract	Concern	Countermeasures against ransomware, network based, no IDS	0								819
					Mohamed Elsabagh, Daniel BarbarÃ¡, Dan Fleck, Angelos Stavrou	On early detection of application-level resource exhaustion and starvation	2018		Elsevier		Insufficient Quality	Included	Fulltext	Exclusive	Early detection of resource over consumption, builds application profiles using system calls	0								820
					Wael Khreich, Syed Shariyar Murtaza, Abdelwahab Hamou-Lhadj, Chamseddine Talhi	Combining heterogeneous anomaly detectors for improved software security	2018		Elsevier		Insufficient Quality	Included	Abstract	Exclusive	Introduces HIDS approach combining different detectors on system calls	0								821
					Nanda Kumar Thanigaivelan, Ethiopia Nigussie, Antti Hakkala, Seppo Virtanen, Jouni Isoaho	CoDRA: Context-based dynamically reconfigurable access control system for android	2018		Elsevier		In-/Exclusion Parameter	Excluded	Abstract	Concern	No IDS but adaptive access control	0								822
					Valentina Casola, Alessandra De Benedictis, Massimiliano Rak, Umberto Villano	Chapter 11 â€“ Monitoring Data Security in the Cloud: A Security SLA-Based Approach	2018		Elsevier		In-/Exclusion Parameter	Excluded	Meta	Availability	Not currently available at uniiversity library, book chapter	0								823
Springer	("Intrusion Detection" OR "Anomaly Detection" OR "Application Intrusion Detection") AND ("Host-Based" OR "Application Based" OR "Application Specific" OR "Application Aware" OR "Application Sensitive") AND ("Program Behavior" OR "Application Behavior" OR "Software Behavior")	43571	2018-2019	20	Gilberto Fernandes Jr.,Joel J. P. C. Rodrigues,Luiz Fernando Carvalho,Jalal F. Al-Muhtadi,Mario Lemes Proença Jr.	A comprehensive survey on network anomaly detection	2019		Springer		In-/Exclusion Parameter	Excluded	Title	Form	Survey	0								824
					Xue Li Hu,Lian Cheng Zhang,Zhen Xing Wang	An adaptive smartphone anomaly detection model based on data mining	2018		Springer		In-/Exclusion Parameter	Excluded	Abstract	Concern	Network	1	Yes	Yes						825
					Sanmeet Kaur,Maninder Singh	Hybrid intrusion detection and signature generation using Deep Recurrent Neural Networks	2019		Springer		In-/Exclusion Parameter	Excluded	Fulltext	Concern	Network based deep learning signature generation	1	Yes	Yes						826
					Denis Shaykhislamov,Vadim Voevodin	An Approach for Detecting Abnormal Parallel Applications Based on Time Series Analysis Methods	2018		Springer		In-/Exclusion Parameter	Excluded	Abstract	Concern	Monitoring for performance not for security	0								827
					Mingyi Zhu,Kejiang Ye,Cheng-Zhong Xu	Network Anomaly Detection and Identification Based on Deep Learning Methods	2018		Springer		In-/Exclusion Parameter	Excluded	Title	Network	Concerned with Network based IDS	0	No	No	International Conference on Cloud Computing.	N/A				828
					Pol Van Aubel,Kostas Papagiannopoulos,Åukasz Chmielewski,Christian Doerr	Side-Channel Based Intrusion Detection for Industrial Control Systems	2018		Springer		Insufficient Quality	Included?				0	No	No	International Conference on Critical Information Infrastructures Security	N/A				829
					Robert Luh,Gregor Schramm,Markus Wagner,Helge Janicke,Sebastian Schrittwieser	SEQUIN: a grammar inference framework for analyzing malicious system behavior	2018		Springer		In-/Exclusion Parameter	Excluded	Fulltext	Concern	Anomaly detection on system traces based on "Sequitur" algorithm, main goal seems to be visualization of grammar, only log analysis , monitoring only for logging, detects anomalies in log - no later behavior comparison	0								830
					Max Grossman,Howard Pritchard,Tony Curtis,Vivek Sarkar	HOOVER: Distributed, Flexible, and Scalable Streaming Graph Processing on OPENSHMEM	2019		Springer			Excluded	Abstract	Concern	Paper on graph processing targeting different applications, not just Intrusion Detection.	0	No	No						831
					Muhammed O. Sayin,Hossein Hosseini,Radha Poovendran,Tamer Başar	A Game Theoretical Framework for Inter-process Adversarial Intervention Detection	2018		Springer		Insufficient Quality	Included?				0	No	No	International Conference on Decision and Game Theory for Security	N/A				832
					Christopher Mansour,Danai Chasaki	Adaptive security monitoring for next-generation routers	2019	MC19	Springer	Yes		Included	Fulltext	Novel	Intrusion detection/monitoring approach tailored to network switches	1.5	Yes	Yes					Partly	833
					Asghar Tajoddin,Mahdi Abadi	RAMD: registry-based anomaly malware detection using one-class ensemble classifiers	2019	TA19	Springer	Yes		Included	Abstract	Novel	Monitoring registry behavior and using it to detect malicious registry behavior	1.5	Yes	Yes					Partly	834
					Bo Yu,Ying Fang,Qiang Yang,Yong Tang,Liu Liu	A survey of malware behavior description and analysis	2018		Springer		In-/Exclusion Parameter	Excluded	Title	Form	Survey	0								835
					Kejiang Ye,Yangyang Liu,Guoyao Xu,Cheng-Zhong Xu	Fault Injection and Detection for Artificial Intelligence Applications in Container-Based Clouds	2018		Springer		Insufficient Quality	Included?				0	No	No	International Conference on Cloud Computing	N/A				836
					Julien Duchene,Colas Le Guernic,Eric Alata,Vincent Nicomette,Mohamed Kaâniche	State of the art of network protocol reverse engineering tools	2018		Springer		In-/Exclusion Parameter	Excluded	Abstract	Concern	Network tracing survey	0								837
					Zhilin Zhu,Xiaojian Liu	A formal framework for software faults and permissions based on unified theory of programming	2018		Springer		In-/Exclusion Parameter	Excluded	Abstract	Concern	Not mainly concerned with detection, but introduces framework for safety/security modeling	0								838
					Toqeer Ali,Muhammad Nauman,Salman Jan	Trust in IoT: dynamic remote attestation through efficient behavior capture	2018		Springer		Insufficient Quality	Included	Fulltext	Novel	Scalable method to verify application behavior based on system calls	0								839
					Jaouad Benabbou,Khalid Elbaamrani,Noureddine Idboufker	Security in OpenFlow-based SDN; opportunities and challenges	2019		Springer		In-/Exclusion Parameter	Excluded	Fulltext	Concern	No new monitoring approach, of software behavior, network focused security discussion and proposal	1	Yes	Yes						840
					Stefano Cristalli,Edoardo Vignati,Danilo Bruschi,Andrea Lanzi	Trusted Execution Path for Protecting Java Applications Against Deserialization of Untrusted Data	2018		Springer		Insufficient Quality	Included?				0	No	No	International Symposium on Research in Attacks, Intrusions, and Defenses	N/A				841
					Mariano Ceccato,Paolo Tonella,Cataldo Basile,Paolo Falcarin,Marco Torchiano,Bart Coppens,Bjorn De Sutter	Understanding the behaviour of hackers while performing attack tasks in a professional setting and in a public challenge	2019		Springer		In-/Exclusion Parameter	Excluded	Abstract	Concern	No new approach, deals with building behavior models of hackers	1	Yes	Yes						842
					Saber Zerdoumi,Aznul Qalid Md Sabri,Amirrudin Kamsin,Ibrahim Abaker Targio Hashem,Abdullah Gani,Saqib Hakak,Mohammed Ali Al-Garadi,Victor Chang	Image pattern recognition in big data: taxonomy and open challenges: survey	2018		Springer		In-/Exclusion Parameter	Excluded	Title	Form	Survey, also image recognition not IDS	0								843
USENIX	Google: ("Intrusion Detection" OR "Anomaly Detection" OR "Application Intrusion Detection") AND ("Host-Based" OR "Application Based" OR "Application Specific" OR "Application Aware" OR "Application Sensitive") AND ("Program Behavior" OR "Application Behavior" OR "Software Behavior") filetype:pdf site:usenix.org	43571	2018-2019	1	Md Nahid Hossain, Junao Wang, R Sekar, Scott D Stoller	Dependence-Preserving Data Compaction for Scalable Forensic Analysis	2018		USENIX		Insufficient Quality	Excluded	Fulltext	Concern	The publication introduces a data compaction approach in the context of forensic analysis.	0	No	No	USENIX Security Symposium	A*	Yes			844
